# Supplementary material for: Mapping the preclinical to clinical evidence and development trajectory of the oncolytic virus talimogene laherparepvec (T-VEC): a systematic review
Source: PubMed Central journal article supplement — BMJ Open. 2019 Dec 2;9(12):e029475. doi: 10.1136/bmjopen-2019-029475 (PMC7003485; doi:10.1136/bmjopen-2019-029475), 2019-12-02
Supplement: bmjopen-2019-029475.draft_revisions.pdf [file bmjopen-2019-029475.draft_revisions.pdf]

# BMJ Open

BMJ Open is committed to open peer review. As part of this commitment we make the peer review history of every article we publish publicly available.

When an article is published we post the peer reviewers' comments and the authors' responses online. We also post the versions of the paper that were used during peer review. These are the versions that the peer review comments apply to.

The versions of the paper that follow are the versions that were submitted during the peer review process. They are not the versions of record or the final published versions. They should not be cited or distributed as the published version of this manuscript.

BMJ Open is an open access journal and the full, final, typeset and author-corrected version of record of the manuscript is available on our site with no access controls, subscription charges or pay-per-view fees (<http://bmjopen.bmj.com>).

If you have any questions on BMJ Open's open peer review process please email [info.bmjopen@bmj.com](mailto:info.bmjopen@bmj.com)

# BMJ Open

## Diminishing returns along the road to translation: a systematic review T-VEC's preclinical to clinical development trajectory

|                               |                                                                                                                                                                                                                                                                                                                                                                                                                                                                                                                                        |
|-------------------------------|----------------------------------------------------------------------------------------------------------------------------------------------------------------------------------------------------------------------------------------------------------------------------------------------------------------------------------------------------------------------------------------------------------------------------------------------------------------------------------------------------------------------------------------|
| Journal:                      | <i>BMJ Open</i>                                                                                                                                                                                                                                                                                                                                                                                                                                                                                                                        |
| Manuscript ID                 | bmjopen-2019-029475                                                                                                                                                                                                                                                                                                                                                                                                                                                                                                                    |
| Article Type:                 | Research                                                                                                                                                                                                                                                                                                                                                                                                                                                                                                                               |
| Date Submitted by the Author: | 30-Jan-2019                                                                                                                                                                                                                                                                                                                                                                                                                                                                                                                            |
| Complete List of Authors:     | Lalu, Manoj; Ottawa Hospital Research Institute, Clinical Epidemiology<br>Leung, Garvin; Ottawa Hospital Research Institute, Clinical Epidemiology<br>Dong, Yuan Yi; Ottawa Hospital Research Institute, Clinical Epidemiology<br>Montroy, Joshua; Ottawa Hospital Research Institute, Clinical Epidemiology<br>Butler, Claire; Ottawa Hospital Research Institute, Clinical Epidemiology<br>Auer, Rebecca; Ottawa Hospital Research Institute, Clinical Epidemiology<br>Fergusson, Dean; Ottawa Hospital Research Institute, Medicine |
| Keywords:                     | TVEC, oncolytic virus, cancer, translation, review                                                                                                                                                                                                                                                                                                                                                                                                                                                                                     |
|                               |                                                                                                                                                                                                                                                                                                                                                                                                                                                                                                                                        |

SCHOLARONE™  
Manuscripts

1  
2  
3 **Diminishing returns along the road to translation: a systematic review T-VEC's preclinical**  
4 **to clinical development trajectory**  
5  
6  
7

8 **Manoj M. Lalu† MD, PhD, FRCPC<sup>1,2,3,4</sup>, Garvin J. Leung† MPH<sup>2,5</sup>, Yuan Yi Dong<sup>2,5</sup>,**  
9 **Joshua Montroy MSc,<sup>2</sup> Claire Butler<sup>2</sup>, Rebecca C. Auer MD, MSc, FRCSC<sup>7,8</sup>,**  
10 **Dean A. Fergusson PhD, MHA<sup>\*2,6,7</sup>**  
11  
12  
13

14 <sup>1</sup>Department of Anesthesiology and Pain Medicine, The Ottawa Hospital, University of Ottawa,  
15 Ottawa, ON, Canada

16 <sup>2</sup>Blueprint Translational Research Group, Clinical Epidemiology Program, Ottawa Hospital  
17 Research Institute, Ottawa, ON, Canada

18 <sup>3</sup> Regenerative Medicine Program, Ottawa Hospital Research Institute, Ottawa, ON, Canada

19 <sup>4</sup>Department of Cellular and Molecular Medicine, University of Ottawa , Ottawa, ON, Canada

20 <sup>5</sup>Faculty of Medicine, University of Ottawa, Ottawa, ON, Canada

21 <sup>6</sup>School of Epidemiology and Public Health, University of Ottawa, Ottawa, ON, Canada

22 <sup>7</sup>Department of Surgery, The Ottawa Hospital, University of Ottawa, Ottawa, ON, Canada

23 <sup>8</sup>Cancer Therapeutics Program, Ottawa Hospital Research Institute, Ottawa, ON, Canada

24 † These authors contributed equally to this work  
25  
26  
27

28 Emails: MML: [mlalu@toh.ca](mailto:mlalu@toh.ca); GJL: [garvin.leung@uottawa.ca](mailto:garvin.leung@uottawa.ca); YYD: [ydong044@uottawa.ca](mailto:ydong044@uottawa.ca);  
29 JM: [jmontroy@ohri.ca](mailto:jmontroy@ohri.ca); CB: [clbutler@toh.ca](mailto:clbutler@toh.ca); RCA: [rauer@toh.ca](mailto:rauer@toh.ca); DAF: [dafergusson@ohri.ca](mailto:dafergusson@ohri.ca)  
30  
31

32 \*Corresponding author:

33 Dean A. Fergusson email: [dafergusson@ohri.ca](mailto:dafergusson@ohri.ca)

34 Centre for Practice-Changing Research,

35 Office L1298a

36 501 Smyth Road, Box 201B

37 Ottawa, Ontario, Canada K1H 8L6

38 Tel. 1-613-737-8480

39 Fax. 1-613-739-6938  
40  
41  
42  
43  
44

45 Running Head: The efficacy of T-VEC: A systematic review  
46  
47

48 Word count: 2631  
49  
50  
51  
52  
53  
54  
55  
56  
57  
58  
59  
60

## ABSTRACT

**Objective:** This study aimed to conduct a systematic review of preclinical and clinical evidence to map the successful trajectory of Talimogene laherparepvec (T-VEC), from the bench to the clinic.

**Design:** This study was a systematic review. The primary outcome of interest was the efficacy of treatment, determined by complete response. Abstract and full-text selection as well as data extraction was done by two independent reviewers. The Cochrane risk of bias tool was used to assess the risk of bias in studies.

**Setting:** Embase, Embase Classic, and OvidMedline were searched from inception until May 2016 to assess its development trajectory to approval in 2015.

**Participants:** Preclinical and clinical controlled comparison studies, as well as observational studies.

**Interventions:** T-VEC for treatment of any malignancy.

**Results:** 8,852 records were screened and five preclinical (n=150 animals) and seven clinical studies (n=589 patients) were included. We saw large decreases in T-VEC's efficacy as studies moved from the laboratory to patients, and as studies became more methodologically rigorous. Preclinical studies reported complete regression rates up to 100% for injected tumors and 80% for contralateral tumors, while the highest degree of efficacy seen in the clinical setting was a 24% complete response rate, with one study experiencing a complete response rate of 0%. We were unable to reliably assess safety due to the lack of reporting, as well as the heterogeneity seen in adverse event definitions. All preclinical studies had high or unclear risk of bias, and all clinical studies were at a high risk of bias in at least one domain.

1  
2  
3 **Conclusions:** Our findings illustrate that even successful biotherapeutics may not demonstrate a  
4 clear translational road map. This emphasizes the need to consider increasing rigour along the  
5 translational pathway.  
6  
7  
8  
9

10 **PROSPERO Registration Number:** CRD42016043541  
11  
12

13 **Keywords:** TVEC, oncolytic virus, cancer, translation, review  
14  
15

### 16 17 18 19 **Strengths and limitations of this study** 20

- 21 • Comprehensive, up-to-date review of the efficacy and safety of TVEC
- 22 • Threats to both internal validity and construct validity were performed
- 23 • Reporting of methods and findings was incomplete in most of the studies included
- 24 • Poor reporting and study design are major contributors to the ongoing reproducibility crisis  
25  
26  
27  
28  
29  
30  
31  
32 in preclinical research  
33  
34  
35  
36  
37  
38  
39  
40  
41  
42  
43  
44  
45  
46  
47  
48  
49  
50  
51  
52  
53  
54  
55  
56  
57  
58  
59  
60

## BACKGROUND

Preclinical research receives approximately half of the world's biomedical research funding, yet very few of its findings translate clinically. This represents an enormous waste of resources with an estimated 28 billion dollars per year in the US alone being spent on biomedical research which is not reproducible and therefore not translatable.(1) One study found that only 5% of highly efficacious preclinical therapeutics were clinically translated.(2) These successes often take almost twenty years to become successfully translated. (2, 3) Given the high failure rate in translating therapies and significant time-lags, it is crucial we evaluate and learn from the few agents that have successfully crossed the preclinical-to-clinical bridge in order to learn from and replicate their success.

Thus, we conducted a comprehensive evaluation of available evidence supporting the successful translation of Talimogene laherparepvec (T-VEC). T-VEC is a modified HSV-1 virus produced by *Amgen* and it is the first, and only, FDA approved oncolytic virus therapy; it is currently approved to treat advanced melanoma.(4) Oncolytic viruses are an emerging cancer therapy that work by preferentially targeting and infecting cancer cells.(4) Upon infection, oncolytic viruses can induce an anti-tumor immune response that reduces tumor burden.

Through a careful evaluation of T-VEC development we hoped to identify factors that may contribute to bench-to-bedside success. This may serve an exemplar for other therapies as they move along the translational continuum. Thus, the purpose of this systematic review was to map the successful preclinical to clinical trajectory of T-VEC to inform the development paths of new biotherapeutics.

## METHODS

Our review was registered in full on PROSPERO, the international prospective register of systematic reviews (no. CRD42016043541). The review is reported in accordance to the PRISMA guidelines.<sup>(5)</sup>

### Eligibility Criteria

We included all clinical and preclinical *in vivo* controlled comparison studies of TVEC for treatment of any malignancy (randomized, pseudo-randomized, and non-randomized studies), as well as observational studies such as case-control, case-series and case reports. Studies reporting only *ex vivo* or *in vitro* experiments were excluded. For both preclinical and clinical studies, we included studies that administered TVEC as a monotherapy or in combination with other therapies for treatment of malignancy. We had no exclusions on comparison treatments, which include standard line therapy or no treatment.

### Outcomes

The primary outcome of interest was the efficacy of treatment. Our primary indicator of efficacy was complete response. Other measures of efficacy such as survival, response rates (durable, partial, objective), time to treatment failure, and disease stability were also collected. Such measures were based on the Response Evaluation Criteria in Solid Tumors (RECIST) Guidelines.<sup>(6)</sup> In preclinical studies, additional measures of efficacy such as changes in mean tumor volume and number of lesions were collected. The secondary outcome of interest was safety, for which we collected data on all adverse events in preclinical and clinical studies.

### Literature Search

1  
2  
3 In collaboration with a medical information specialist (Risa Shorr, Learning Services, The Ottawa  
4 Hospital) a search strategy was designed to identify all relevant preclinical and clinical studies.  
5  
6 Searches were conducted in the following databases: Embase, Embase Classic, and OvidMedline  
7  
8 from inception until May 2016. This time frame was chosen to ensure all published studies that  
9  
10 contributed T-VECs FDA approval in 2015 were included. Search terms included: Talimogen  
11  
12 laherparepvec, Tvec, OncoVEX and Imlygic. Additional terms pertaining to preclinical studies  
13  
14 (e.g. animal experiment/model) and oncology (e.g. cancer, neoplasm, oncolytic virus) were also  
15  
16 included. Studies were also screened for inclusion based on reference tracking, by scanning the  
17  
18 bibliography of included primary studies and relevant review articles. We did not impose any  
19  
20 restrictions on language or publication type. The finalized search strategy can be found in  
21  
22 Appendix 1.  
23  
24  
25  
26  
27  
28

### 29 **Study Selection Process**

30  
31  
32 Studies identified by our literature search were collated and duplicates were removed. Titles and  
33  
34 abstracts were independently screened for inclusion by two reviewers using DistillerSR (Evidence  
35  
36 Partners, Ottawa, ON). Those deemed potentially relevant were recorded, and full-text articles  
37  
38 were obtained. The same reviewers screened full articles for final eligibility. Disagreements at  
39  
40 any stage were resolved by discussion or by consultation with a senior team member when  
41  
42 necessary. The study selection process was documented using a PRISMA flow diagram (Figure  
43  
44  
45  
46 1).  
47  
48

### 49 **Data Extraction**

50  
51  
52 All data extraction was completed independently and in duplicate, using a standardized and piloted  
53  
54 data extraction form, with disagreements resolved as mentioned above. Data pertaining to general  
55  
56  
57  
58  
59  
60



1  
2  
3 and intervention characteristics of the included studies were extracted (e.g. study design, country,  
4 type of malignancy, dosing of intervention and comparator treatments). For clinical studies, data  
5 was collected on patient characteristics (e.g. age, sex, cancer staging, HSV status). For preclinical  
6 studies, characteristics on the animal model were extracted (e.g. type of species, cell line used,  
7 disease induction method, age, sex, weight).  
8  
9  
10  
11  
12  
13

### 14 15 **Risk of bias – assessment to risk of internal validity**

16  
17  
18 Clinical studies that met inclusion criteria were assessed for risk of bias in duplicate, according to  
19 the recommended methodology of the Cochrane Collaboration. Five types of biases (selection,  
20 performance, detection, attrition, reporting biases) were assessed using six domains:  
21 randomization, allocation concealment, blinding of participants/personnel, outcome assessment  
22 blinding, incomplete outcome reporting, and selective outcome reporting. Additional domains  
23 assessed for risk of bias were: i) reported conflicts of interest, ii.) sample size calculation, and iii.)  
24 funding. Each domain was given a score of “high”, “unclear”, or “low” risk of bias for each study.  
25  
26 Risk of bias assessment for preclinical studies were assessed using a modified Cochrane Risk of  
27 Bias tool and assessed the same domains as indicated for clinical studies.  
28  
29  
30  
31  
32  
33  
34  
35  
36  
37  
38  
39

### 40 **Assessment of threats to construct validity**

41  
42 Construct validity is the concept in how much a preclinical experiment (i.e. animal studies)  
43 corresponds to the clinical entity it is intended to model. There are various threats to construct  
44 validity that can be introduced from the preclinical study design. The items evaluated in duplicate  
45 for each preclinical study include: i.) use of adult animals, ii.) use of animals with advanced stage  
46 disease (defined as the presence of multiple visceral lesions and/or clinical/histological signs of  
47 malignant progression), iii.) immune status of animals to HSV, iv.) whether a xenograft model was  
48  
49  
50  
51  
52  
53  
54  
55  
56  
57  
58  
59  
60

1  
2  
3 used, and v.) the use of a humanized immune system model. Each of these items was given a score  
4  
5 of “yes”, “no”, or “unclear” for every preclinical study.  
6  
7

### 8 **Statistical Analysis**

9  
10  
11 Efficacy was expressed as simple proportions. To assess the continuity between preclinical and  
12  
13 clinical studies, the efficacy of studies was plotted as percentage response.  
14  
15

### 16 **Deviations from Protocol**

17  
18  
19 We were unable to assess safety as we could not acquire patient-level safety data. Furthermore,  
20  
21 our primary efficacy outcome stated in protocol was durable response rate. However, this was  
22  
23 changed to complete response as most clinical studies did not report durable response. Subgroup  
24  
25 analyses, meta-analyses, Egger’s test, and pooling of data could not be conducted due to the limited  
26  
27 available data.  
28  
29  
30

### 31 **Patient and Public Involvement**

32  
33  
34 Patients and the public were not involved in this research.  
35  
36

## 37 **RESULTS**

38  
39  
40 Upon removal of duplicates, a total of 8,852 references were identified by the electronic search.  
41  
42 During the review of titles and abstracts, 7,890 references were excluded. Following full text  
43  
44 screening, a total of seven clinical studies,(7-13) and five preclinical studies(14-18) were  
45  
46 included in our review (Figure 1).  
47  
48

### 49 ***Characteristics of Included Trials***

50  
51  
52 Characteristics of included studies are shown in Table 1. Preclinical studies were published  
53  
54 between 2003 and 2016 and sample sizes ranged from 20 to 90. Of the five preclinical studies,  
55  
56  
57  
58  
59

1  
2  
3 three used a lymphoma model, one used a colorectal model, and one used a melanoma model. All  
4 studies were performed in mice. The duration of follow-up was reported by two studies and ranged  
5 from 10 days to 35 days. The dose of TVEC used ranged from  $3 \times 10^4$  plaque forming units (PFU)  
6 to  $5 \times 10^6$  PFU. One frequency of TVEC administration varied from, every three days for one week,  
7 every three days for nine days, a single dose given only once, and every other day for five days.  
8 Specific details of study and intervention characteristics for each preclinical study can be found in  
9 Appendix 2.  
10  
11  
12  
13  
14  
15  
16  
17  
18  
19

20 Clinical studies were published between 2006 and 2016 and took place in seven countries. Sample  
21 sizes ranged from 17 to 295. Of the seven clinical studies, four were in melanoma patients, one  
22 was in pancreatic cancer patients, one in head and neck cancer patients and one studied breast,  
23 colorectal, melanoma and head and neck cancer patients. Six were either Phase I or II, and one  
24 trial was a Phase III evaluation. The primary outcome was efficacy in two studies, safety in three  
25 studies and a combination of efficacy and safety in the other two studies. The duration of follow-  
26 up ranged from six weeks to 44 months.  
27  
28  
29  
30  
31  
32  
33  
34  
35  
36

37 TVEC was administered alone in four studies, while it was administered adjuvant to chemotherapy  
38 in 3 studies. The dose of TVEC administered ranged from  $10^4$  PFU/mL to  $10^8$  PFU/mL. In the  
39 large, Phase III study, TVEC was administered at  $\leq 4 \text{ mL} \times 10^6$  PFU/mL once, and then three weeks  
40 later,  $\leq 4 \text{ mL} \times 10^8$  PFU/mL was administered every two weeks for a median of 23 weeks. A similar  
41 dosing regimen was used in three other trials. The other three trials were dose-finding in nature  
42 and had multiple trial arms receiving increasing doses of TVEC. In-depth study details, as well as  
43 participant and intervention details for each study can be found in Appendix 2.  
44  
45  
46  
47  
48  
49  
50  
51  
52

### 53 ***Efficacy of Treatment***

54  
55  
56  
57  
58  
59  
60

1  
2  
3 Treatment efficacy for each study is summarized in Table 1 and Figure 2. Preclinical studies  
4 reported complete regression rates up to 100% for injected tumors and 80% for contralateral  
5 tumors. In comparison, the first published Phase I T-VEC clinical trial reported a complete  
6 response of 0% for cutaneous lesions caused by malignancies of head and neck, breast, colorectal,  
7 and melanoma<sup>4</sup>. Of the multiple malignancies treated, melanoma had the best response in this  
8 trial. Subsequent Phase I/II melanoma trials were then conducted and demonstrated complete  
9 response rates of 20-22%. This was followed by the Phase III OPTIM melanoma trial, which had  
10 a complete response rate of 10.8%.<sup>5-7</sup> Studies involving non-melanoma cancers varied with  
11 efficacies between 0-24%.<sup>8,9</sup>

### 24 ***Safety of treatment***

25  
26  
27 We attempted to assess safety, however we were unable to obtain patient level data from any of  
28 the studies. The definitions of adverse events, and the manner in which they were classified, was  
29 found to be highly heterogenous across studies, therefore we were unable to pool adverse events  
30 or interpret findings reliably.

### 37 ***Validity Assessments***

38  
39  
40 Construct validity, the concept of how well an animal model represents the clinical entity it is  
41 intended to mimic, was first assessed through the following domains: the use of appropriately-  
42 aged mice, advanced stage of disease, HSV-immunity, and types of mouse models. None of the  
43 preclinical studies fully reported or used methodologies to reduce threats to construct validity  
44 domains (Table 2). No studies declared using adult animal models, no studies used animals with  
45 late stage disease, only one study used animals immune to HSV, no studies used a xenograft model,  
46 and no studies reported using an animal model with a humanized immune system.

1  
2  
3 We also assessed internal validity (i.e. risk of bias) and found that all preclinical studies had high  
4 or unclear risk of bias across the assessed domains: randomization sequence, allocation  
5 concealment, blinding, incomplete reporting, sample size calculation, and funding source (Table  
6 3). For clinical studies, early phase trials had high or unclear risk of bias across at least six of nine  
7 domains whereas the more robust Phase III OPTIM trial had the lowest risk of bias and also the  
8 lowest efficacy of any of the published melanoma clinical trials (Table 4). Reporting of key  
9 methodological elements was lacking.  
10  
11  
12  
13  
14  
15  
16  
17  
18  
19

## 20 **DISCUSSION**

21  
22 We hoped to synthesize a clear road map of T-VEC's translation in the published literature to  
23 follow the journey a successful biotherapeutic travels. Yet, we were unable to paint a clear picture  
24 of how the evidence was utilized in proceeding to melanoma clinical trials. Rather, our assessment  
25 uncovered a clear disconnect between *in vivo* preclinical and clinical findings. Furthermore, the  
26 road map was plagued with poor reporting, high risk of bias, and insufficient data along the  
27 translational path. Overall, we were surprised by the pace and magnitude of diminishing efficacy  
28 as T-VEC moved from bench to bedside and then towards later phase clinical trials (i.e. Phase I to  
29 III).  
30  
31  
32  
33  
34  
35  
36  
37  
38  
39  
40  
41

42 While many novel therapeutics are under intellectual property rights, details of study design and  
43 results should be transparently reported for scientists, clinicians, and patients to evaluate findings.  
44 The fact that the only FDA approved oncolytic virus therapy is not clearly reported illustrates the  
45 issues plaguing the success of cancer therapeutics. Nonetheless, T-VEC has shown some efficacy  
46 in treating refractory melanoma and numerous clinical trials are underway to assess its use in  
47 combination with other cancer regimens and in treating other malignancies. While we recognize  
48 that translation is not a linear process, we should observe consistent and coherent patterns. Moving  
49  
50  
51  
52  
53  
54  
55  
56  
57  
58  
59  
60

1  
2  
3 forward, we suggest that preclinical and clinical studies for emerging therapies should be fully  
4 reported and attention should be given to validities in order to develop more precise estimates of  
5 effect early in development. We believe these steps will provide unbiased and valuable  
6 information that will ultimately provide patients with potentially more efficacious cancer therapies  
7 and protect them against needless evaluation.  
8  
9  
10  
11  
12  
13

14  
15 Perhaps the largest discrepancy noted was that only a single preclinical study used a melanoma  
16 model, whereas 5/7 clinical studies administered T-VEC to melanoma patients. Conversely,  
17 lymphoma, which was used in three preclinical studies, was not assessed in clinical studies.  
18 Interestingly, our subsequent searches found that Amgen's FDA filing (STN# 125518.000) for T-  
19 VEC did not appear to report on any *in vivo* melanoma models, whereas the EMA report did  
20 (EMA/734400/2015). Thus, the majority of animal models were off-target from the malignancies  
21 studied in clinical trials and may have poorly represented melanoma in the clinical setting.  
22 Coupled with these findings was the fact that the majority of our studies were found to be at a high  
23 risk of bias.  
24  
25  
26  
27  
28  
29  
30  
31  
32  
33  
34  
35

36 Such threats to internal validity can bias results and may help explain T-VEC's superior preclinical  
37 efficacy compared to later phase clinical trials. A lack of randomization and blinding in preclinical  
38 studies has been associated with inflated effect sizes,(19, 20) thus this may partially explain the  
39 preclinical to clinical discrepancy of T-VEC.  
40  
41  
42  
43  
44  
45

46 Reporting of methods and findings was incomplete in most of the studies included. Only one full  
47 preclinical article on T-VEC was published, and solely aggregate patient data for later phase trials  
48 was available. Poor reporting and study design are major contributors to the ongoing  
49 reproducibility crisis in preclinical research.(21) Thus, in hopes of presenting a clearer picture of  
50 T-VEC's successful translation, we contacted *Amgen* to obtain preclinical *in vivo* melanoma data,  
51  
52  
53  
54  
55  
56  
57  
58  
59  
60

1  
2  
3 patient-level safety data, and any additional efficacy data. Patient-level data would afford the  
4  
5 ability to combine data across T-VEC's clinical development and also provide clarification into  
6  
7 the categorization of adverse events. Recently, release of individual patient data to third parties  
8  
9 has been advocated by the Institute of Medicine, journal editors, and others as it enhances  
10  
11 transparency, enables re-analyses of data, and helps address reproducibility.(22) However, *Amgen*  
12  
13 was unwilling to enter a data sharing agreement, as they stated that there was little value to compel  
14  
15 a transparent data release for our proposed analyses. This lack of transparency and incomplete  
16  
17 reporting is disappointing, especially considering that it was *Amgen* that previously fingered poor  
18  
19 reporting as contributing to its own failure to reproduce 47 of 53 high-impact preclinical cancer  
20  
21 studies.(23) Their findings fuelled a call by the NIH and other stakeholders to enhance the  
22  
23 reproducibility and transparency of preclinical research.(24)  
24  
25  
26  
27  
28

## 29 **CONCLUSIONS**

30  
31  
32 The findings from our systematic review demonstrate that even successful biotherapeutics may  
33  
34 not demonstrate a clear translational road map. The magnitude of efficacy of T-VEC demonstrated  
35  
36 in preclinical studies was considerably larger when T-VEC was moved to the clinic, and the most  
37  
38 methodologically rigorous trial included in our review demonstrated the smallest degree of  
39  
40 efficacy. Methodologically rigorous studies should be performed earlier on in the translational  
41  
42 pathway, which may help to get a realistic estimate of treatment efficacy prior to clinical  
43  
44 translation.  
45  
46  
47  
48  
49  
50  
51  
52  
53  
54  
55  
56  
57  
58  
59  
60

## DECLARATIONS

*Ethics approval:* Not applicable.

*Consent for publication:* Not applicable.

*Availability of data:* The datasets used and/or analysed during the current study are available from the corresponding author on reasonable request.

*Competing interests:* The authors declare that they have no competing interests.

*Funding:* Biotherapeutics for Cancer Treatment (BioCanRx) supported the conduct of this study by a Catalyst grant. BioCanRx is a Government of Canada funded Networks of Centres of Excellence and was not involved in any other aspect of the project, such as the design of the project's protocol and analysis plan, the collection of data and analyses. CB was also supported by a BioCanRx studentship. ML is supported by The Ottawa Hospital Anesthesia Alternate Funds Association and the Scholarship Protected Time Program, Department of Anesthesiology and Pain Medicine, uOttawa.

*Author contributions:* MML and DAF conceptualized the study. MML, RA, DAF, and GJL contributed to the study design. GJL, YYD, and CB conducted data extraction. All authors analysed and interpreted the data. MML and GJL were responsible for drafting the manuscript. All authors critically reviewed the manuscript and provided intellectual content. All authors approve the final version of the manuscript.

*Acknowledgments:* We thank Risa Shorr (Ottawa Hospital Research Institute librarian) for systematic search assistance. MML is supported by The Ottawa Hospital Anesthesia Alternate Funds Association and the Scholarship Protected Time Program, Department of Anesthesiology and Pain Medicine, uOttawa.



## REFERENCES

1. Freedman LP, Cockburn IM, Simcoe TS. The Economics of Reproducibility in Preclinical Research. *PLoS biology*. 2015;13(6):e1002165.
2. Contopoulos-Ioannidis DG, Ntzani E, Ioannidis JP. Translation of highly promising basic science research into clinical applications. *The American journal of medicine*. 2003;114(6):477-84.
3. Morris ZS, Wooding S, Grant J. The answer is 17 years, what is the question: understanding time lags in translational research. *Journal of the Royal Society of Medicine*. 2011;104(12):510-20.
4. Rehman H, Silk AW, Kane MP, Kaufman HL. Into the clinic: Talimogene laherparepvec (T-VEC), a first-in-class intratumoral oncolytic viral therapy. *J Immunother Cancer*. 2016;4:53.
5. Moher D, Liberati A, Tetzlaff J, Altman DG, Group P. Preferred reporting items for systematic reviews and meta-analyses: the PRISMA statement. *J Clin Epidemiol*. 2009;62(10):1006-12.
6. Eisenhauer EA, Therasse P, Bogaerts J, Schwartz LH, Sargent D, Ford R, et al. New response evaluation criteria in solid tumours: revised RECIST guideline (version 1.1). *Eur J Cancer*. 2009;45(2):228-47.
7. Hu JC, Coffin RS, Davis CJ, Graham NJ, Groves N, Guest PJ, et al. A phase I study of OncoVEXGM-CSF, a second-generation oncolytic herpes simplex virus expressing granulocyte macrophage colony-stimulating factor. *Clinical cancer research : an official journal of the American Association for Cancer Research*. 2006;12(22):6737-47.
8. Senzer NN, Kaufman HL, Amatruda T, Nemunaitis M, Reid T, Daniels G, et al. Phase II clinical trial of a granulocyte-macrophage colony-stimulating factor-encoding, second-generation oncolytic herpesvirus in patients with unresectable metastatic melanoma. *J Clin Oncol*. 2009;27(34):5763-71.
9. Andtbacka RHI, Kaufman HL, Collichio F, Amatruda T, Senzer N, Chesney J, et al. Talimogene Laherparepvec Improves Durable Response Rate in Patients With Advanced Melanoma. *Journal of Clinical Oncology*. 2015;33(25):2780-8.
10. Long GV, Dummer R, Ribas A, Puzanov I, Michielin O, Vanderwalde A, et al. 24LBA Safety data from the phase 1b part of the MASTERKEY-265 study combining talimogene laherparepvec (T-VEC) and pembrolizumab for unresectable stage IIIB-IV melanoma. *European Journal of Cancer*. 2015;51:S722.
11. Puzanov I, Milhem MM, Minor D, Hamid O, Li A, Chen L, et al. Talimogene Laherparepvec in Combination With Ipilimumab in Previously Untreated, Unresectable Stage IIIB-IV Melanoma. *J Clin Oncol*. 2016;34(22):2619-26.
12. Harrington KJ, Hingorani M, Tanay MA, Hickey J, Bhide SA, Clarke PM, et al. Phase I/II study of oncolytic HSV GM-CSF in combination with radiotherapy and cisplatin in untreated stage III/IV squamous cell cancer of the head and neck. *Clinical cancer research : an official journal of the American Association for Cancer Research*. 2010;16(15):4005-15.
13. Chang KJ, Senzer NN, Binmoeller K, Goldsweig H, Coffin R. Phase I dose-escalation study of talimogene laherparepvec (T-VEC) for advanced pancreatic cancer (ca). *Journal of Clinical Oncology*. 2012;30(15\_suppl):e14546-e.
14. Liu BL, Robinson M, Han ZQ, Branston RH, English C, Reay P, et al. ICP34.5 deleted herpes simplex virus with enhanced oncolytic, immune stimulating, and anti-tumour properties. *Gene Ther*. 2003;10(4):292-303.
15. Piasecki J, Tiep L, Zhou J, Beers C. Talimogene laherparepvec generates systemic T-cell-mediated anti-tumor immunity. *Journal for ImmunoTherapy of Cancer*. 2013;1(1):P198.
16. Cooke K, Rottman J, Zhan J, Mitchell P, Ikotun O, Yerby B, et al. Oncovex MGM-CSF –mediated regression of contralateral (non-injected) tumors in the A20 murine lymphoma model does not involve direct viral oncolysis. *Journal for Immunotherapy of Cancer*. 2015;3(Suppl 2):P336-P.

17. Piasecki J, le T, Ponce R, Beers C. Abstract 258: Talimogene laherparepvec increases the anti-tumor efficacy of the anti-PD-1 immune checkpoint blockade. *Cancer Research*. 2015;75(15 Supplement):258-.
18. Cooke K, Estrada J, Zhan J, Mitchell P, Bulliard Y, Beltran PJ. Abstract 2351: Development of a B16F10 cell line expressing mNectin1 to study the activity of OncoVEXmGM-CSF in murine syngeneic melanoma models. *Cancer Research*. 2016;76(14 Supplement):2351-.
19. Hirst JA, Howick J, Aronson JK, Roberts N, Perera R, Koshiaris C, et al. The need for randomization in animal trials: an overview of systematic reviews. *PLoS One*. 2014;9(6):e98856.
20. Macleod MR, van der Worp HB, Sena ES, Howells DW, Dirnagl U, Donnan GA. Evidence for the efficacy of NXY-059 in experimental focal cerebral ischaemia is confounded by study quality. *Stroke*. 2008;39(10):2824-9.
21. Landis SC, Amara SG, Asadullah K, Austin CP, Blumenstein R, Bradley EW, et al. A call for transparent reporting to optimize the predictive value of preclinical research. *Nature*. 2012;490(7419):187-91.
22. Zarin DA, Tse T. Sharing Individual Participant Data (IPD) within the Context of the Trial Reporting System (TRS). *PLoS Med*. 2016;13(1):e1001946.
23. Begley CG, Ellis LM. Drug development: Raise standards for preclinical cancer research. *Nature*. 2012;483(7391):531-3.
24. Collins FS, Tabak LA. Policy: NIH plans to enhance reproducibility. *Nature*. 2014;505(7485):612-3.

## Figure Legends

### Figure 1. Study selection flow diagram

**Figure 2. Preclinical and clinical efficacy of T-VEC.** Four preclinical studies using mice demonstrated efficacy rates of 20-100% and clinical studies (3 melanoma and 2 mixed malignancy studies) demonstrated efficacy rates from 0-23.5%. Non-melanoma/mixed studies are represented by blue bars whereas melanoma studies are represented by orange bars. Where possible, complete regression rates of contralateral tumors for mice were used in preclinical studies and complete response was used for clinical studies. Efficacy rates decrease in the preclinical to clinical translation and upon more rigorous study design in later phase clinical trials. If possible, error bars are plotted and represent 95% confidence intervals. Some studies were not included in this analysis due to no reporting of outcome for CR.

**Table 1A.** Study characteristics of included preclinical studies of T-VEC.

| Preclinical Study            | Treatment                         | Total Number of Animals Used | Type of Cancer/Model                           | Efficacy Measures*                                                                         | Risk of Bias (/9**) |
|------------------------------|-----------------------------------|------------------------------|------------------------------------------------|--------------------------------------------------------------------------------------------|---------------------|
| Liu, 2003 <sup>14</sup>      | T-VEC; HSV1 wildtype immunization | 90                           | Lymphoma (A20 murine lymphoma mouse model)     | CR: 100% (n=10) (injected)                                                                 | 9                   |
| Piasecki, 2013 <sup>15</sup> | T-VEC                             | NR                           | Lymphoma (A20 murine lymphoma mouse model)     | CR: 70-100% of injected, 50-60% of contralateral                                           | 9                   |
| Piasecki, 2015 <sup>17</sup> | T-VEC + Anti-PD-1                 | NR                           | Colorectal (MC-38 colon carcinoma mouse model) | CR: 80.0% (44.2-96.5%) (injected)<br>n=10<br>CR: 20.0% (3.5-55.8%) (contralateral)<br>n=10 | 9                   |
| Cooke, 2015 <sup>16</sup>    | T-VEC                             | 40                           | Lymphoma (A20 murine lymphoma mouse model)     | CR: 100% (65.5-100%) (injected)<br>n=10<br>CR: 50% (23.7-76.3%) (contralateral)            | 9                   |
| Cooke, 2016 <sup>18</sup>    | T-VEC                             | 20                           | Melanoma (B16F10 melanoma model)               | NR – statistically significant tumor reduction and survival noted.                         | 9                   |

**Table 2B.** Study characteristics of included clinical studies of T-VEC.

| Clinical Study                                              | Treatment         | Total N         | Type of Cancer                              | Efficacy Measures*                                                                                  | Risk of Bias (/9**) |
|-------------------------------------------------------------|-------------------|-----------------|---------------------------------------------|-----------------------------------------------------------------------------------------------------|---------------------|
| Hu, 2006 <sup>7</sup><br><i>Non-controlled Phase I</i>      | T-VEC             | 30 (9 melanoma) | Breast, colorectal, melanoma, head and neck | CR: 0% (0-14.1%)<br>PR: 0% (0-14.1%)                                                                | 7                   |
| Senzer, 2009 <sup>8</sup><br><i>Non-controlled Phase II</i> | T-VEC             | 50              | Melanoma                                    | OR: 26.0% (15.1-40.6%)<br>CR: 20.0% (10.5-34.1%)<br>PR: 10.0% (3.7-22.6%)                           | 7                   |
| Harrington, 2010 <sup>12</sup><br><i>Phase I/II</i>         | T-VEC + cisplatin | 17              | Head and neck                               | CR: 23.5% (7.8-50.2%)<br>PR: 58.8% (33.5-80.6%)<br>OR: 82.4% (55.8-95.3%)                           | 6                   |
| Chang, 2012 <sup>13</sup><br><i>Phase I</i>                 | T-VEC             | 17              | Pancreatic                                  | OR: 0% (0-22.9%)                                                                                    | 6                   |
| Andtbacka, 2015 <sup>9</sup><br><i>Phase III</i>            | T-VEC             | 295             | Melanoma                                    | DR: 16.3% (12.1-20.5%)<br>OR: 26.4% (21.4-31.5%)<br>PR: 15.6% (11.7-20.3%)<br>CR: 10.8% (7.6-15.1%) | 3                   |

|                                                |                          |     |          |                        |   |
|------------------------------------------------|--------------------------|-----|----------|------------------------|---|
|                                                | GM-CSF (control)         | 141 |          | DR: 2.1% (0-4.5%)      |   |
|                                                |                          |     |          | OR: 5.7% (1.9-9.5%)    |   |
|                                                |                          |     |          | PR: 5.0% (1.3-8.5%)    |   |
|                                                |                          |     |          | CR: < 1%               |   |
| Long, 2015 <sup>10</sup><br><i>Phase Ib</i>    | T-VEC +<br>pembrolizumab | 21  | Melanoma | -                      | 6 |
| Puzanov, 2016 <sup>11</sup><br><i>Phase Ib</i> | T-VEC + IPI              | 18  | Melanoma | DR: 44.4% (22.4-68.7%) | 6 |
|                                                |                          |     |          | OR: 50.0% (29.0-70.9%) |   |
|                                                |                          |     |          | CR: 22.2% (7.4-48.1%)  |   |
|                                                |                          |     |          | PR: 27.8% (10.7-53.6%) |   |

\* DR – durable response; OR – objective response; CR – complete response/complete regression; PR – partial response; DR/OR/CR/PR definitions were based on RECIST guidelines for clinical studies. \*\*Total number of domains that were assessed a score of high risk or unclear (maximum = 9).

Table 3. Construct validity assessment for preclinical studies

| Author, Year   | Adult Used | Animals with Advanced Stage Disease | Animals Immune to HSV | Xenograft Model Used | Used Model with a Humanized Immune System |
|----------------|------------|-------------------------------------|-----------------------|----------------------|-------------------------------------------|
| Cooke, 2016    | Unclear    | No                                  | Unclear               | No                   | Unclear                                   |
| Cooke, 2015    | Unclear    | No                                  | Unclear               | No                   | Unclear                                   |
| Piasecki, 2015 | Unclear    | Unclear                             | Unclear               | No                   | Unclear                                   |
| Piasecki, 2013 | Unclear    | Unclear                             | Unclear               | No                   | Unclear                                   |
| Liu, 2003      | Unclear    | No                                  | Yes                   | No                   | Unclear                                   |

Table 4. Risk of bias assessment for preclinical studies

| Author, Year   | Random Sequence Generation | Allocation Concealment | Blinding of Personnel | Blinded Outcome Assessment | Incomplete Outcomes Addressed | Selective Outcome Reporting | Conflicts of Interest | A Priori Sample Size Calculation | Funding   |
|----------------|----------------------------|------------------------|-----------------------|----------------------------|-------------------------------|-----------------------------|-----------------------|----------------------------------|-----------|
| Cooke, 2016    | High Risk                  | High Risk              | Unclear               | Unclear                    | High Risk                     | High Risk                   | Unclear               | Unclear                          | High Risk |
| Cooke, 2015    | High Risk                  | High Risk              | Unclear               | Unclear                    | High Risk                     | High Risk                   | Unclear               | Unclear                          | High Risk |
| Piasecki, 2015 | Unclear                    | Unclear                | Unclear               | Unclear                    | High Risk                     | High Risk                   | Unclear               | Unclear                          | High Risk |
| Piasecki, 2013 | Unclear                    | Unclear                | Unclear               | Unclear                    | High Risk                     | High Risk                   | Unclear               | Unclear                          | High Risk |

|           |         |         |         |         |           |         |         |         |           |
|-----------|---------|---------|---------|---------|-----------|---------|---------|---------|-----------|
| Liu, 2003 | Unclear | Unclear | Unclear | Unclear | High Risk | Unclear | Unclear | Unclear | High Risk |
|-----------|---------|---------|---------|---------|-----------|---------|---------|---------|-----------|

**Table 5.** Risk of bias assessment for clinical studies

| Author, Year     | Random Sequence Generation | Allocation Concealment | Blinding of Participants and Personnel | Blinding of Outcome Assessors | Incomplete Outcome Data Addressed | Selective Reporting | Conflicts of Interest | Funding   | Sample Size Calculation |
|------------------|----------------------------|------------------------|----------------------------------------|-------------------------------|-----------------------------------|---------------------|-----------------------|-----------|-------------------------|
| Andtbacka, 2015  | Low Risk                   | Low Risk               | High Risk                              | Low Risk                      | Low Risk                          | Low Risk            | High Risk             | High Risk | Low Risk                |
| Long, 2015       | High Risk                  | N/A                    | High Risk                              | Unclear                       | Low Risk                          | Low Risk            | High Risk             | High Risk | Unclear                 |
| Puzanov, 2016    | High Risk                  | N/A                    | High Risk                              | Unclear                       | Low Risk                          | Low Risk            | High Risk             | High Risk | Unclear                 |
| Chang, 2012      | High Risk                  | N/A                    | High Risk                              | Unclear                       | Low Risk                          | Low Risk            | High Risk             | High Risk | Unclear                 |
| Harrington, 2010 | High Risk                  | N/A                    | Unclear                                | High Risk                     | Low Risk                          | Low Risk            | High Risk             | High Risk | Unclear                 |
| Senzer, 2009     | High Risk                  | N/A                    | High Risk                              | Unclear                       | Low Risk                          | High Risk           | High Risk             | High Risk | Unclear                 |
| Hu, 2006         | High Risk                  | N/A                    | Unclear                                | Unclear                       | Low Risk                          | Unclear             | High Risk             | High Risk | Unclear                 |



1  
2  
3  
4  
5  
6  
7  
8  
9  
10  
11  
12  
13  
14  
15  
16  
17  
18  
19  
20  
21  
22  
23  
24  
25  
26  
27  
28  
29  
30  
31  
32  
33  
34  
35  
36  
37  
38  
39  
40  
41  
42  
43  
44  
45  
46  
47  
48  
49  
50  
51  
52  
53  
54  
55  
56  
57  
58  
59  
60

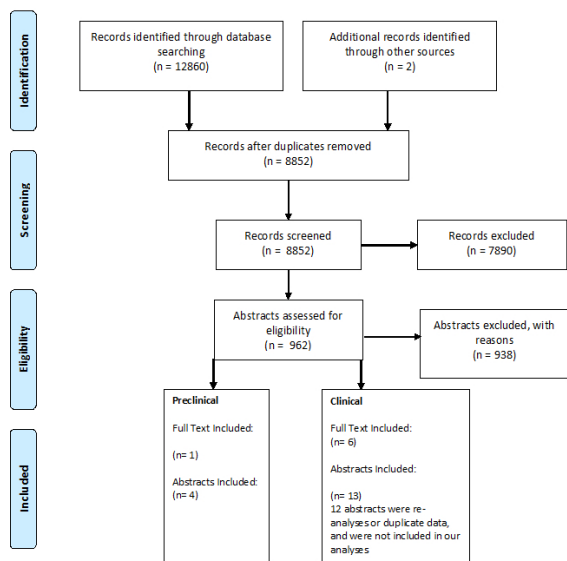

Figure 1. Study selection flow diagram

304x209mm (96 x 96 DPI)

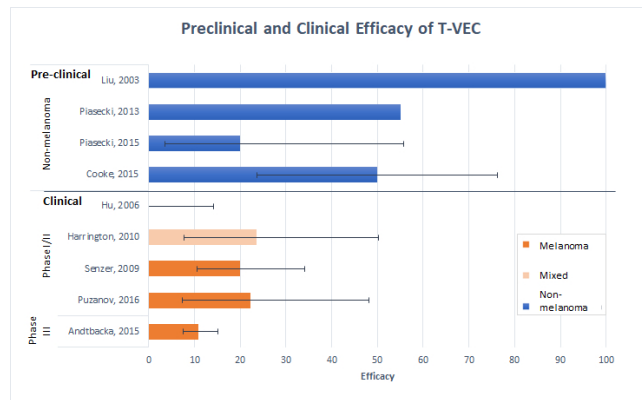

Figure 2. Preclinical and clinical efficacy of T-VEC. Four preclinical studies using mice demonstrated efficacy rates of 20-100% and clinical studies (3 melanoma and 2 mixed malignancy studies) demonstrated efficacy rates from 0-23.5%. Non-melanoma/mixed studies are represented by blue bars whereas melanoma studies are represented by orange bars. Where possible, complete regression rates of contralateral tumors for mice were used in preclinical studies and complete response was used for clinical studies. Efficacy rates decrease in the preclinical to clinical translation and upon more rigorous study design in later phase clinical trials. If possible, error bars are plotted and represent 95% confidence intervals. Some studies were not included in this analysis due to no reporting of outcome for CR.

304x209mm (96 x 96 DPI)

## S1 Appendix: Search Strategy

Database: Ovid MEDLINE(R) In-Process & Other Non-Indexed Citations and Ovid MEDLINE(R) <1946 to Present>

Search Strategy:

- 
- 1 Talimogen\* laherparepvec.mp. (28)
  - 2 t vec.mp. (24)
  - 3 OncoVEX\*.mp. (15)
  - 4 Imlygic.mp. (2)
  - 5 JS1 34\*.tw. (5)
  - 6 or/1-5 (51)
  - 7 Oncolytic Virotherapy/ or Oncolytic Viruses/ or cancer vaccines/tu (7016)
  - 8 (cancer adj2 (vaccine\* or virus\* or virotherap\* or viral therap\*)).tw. (5206)
  - 9 exp neoplasms/ or cancer.tw. (3097511)
  - 10 or/7-9 (3097684)
  - 11 simplexvirus/ or herpesvirus 1, human/ or Herpes Simplex/ (32955)
  - 12 (hsv1 or hsv or herpesvirus or Herpes).tw. (72684)
  - 13 11 or 12 (77360)
  - 14 10 and 13 (12929)
  - 15 ((oncolyt\* or cancer or tumor or tumour) adj3 (hsv1 or hsv or hsv or herpesvirus or Herpes)).tw. (846)
  - 16 (oncolyt\* adj3 (virotherap\* or virus\* or viral therap\*)).tw. (2183)
  - 17 or/14-16 (14671)
  - 18 exp animal experimentation/ or exp models, animal/ or animals/ or mammals/ or vertebrates/ or exp fishes/ or exp amphibia/ or exp reptiles/ or exp birds/ or exp hyraxes/ or exp marsupialia/ or exp monotremata/ or exp scandentia/ or exp chiroptera/ or exp carnivora/ or exp cetacea/ or exp Xenarthra/ or exp elephants/ or exp insectivora/ or exp lagomorpha/ or exp rodentia/ or exp sirenia/ or exp Perissodactyla/ or primates/ or exp strepsirhini/ or haplorhini/ or exp tarsii/ or exp platyrrhini/ or catarrhini/ or exp cercopithecidae/ or gorilla gorilla/ or pan paniscus/ or pan troglodytes/ or exp pongo/ or exp hylobatidae/ or hominidae/ (5893175)

1  
2  
3 19 (animal\$1 or chordata or vertebrate\* or fish\$2 or amphibian\* or amphibium\* or reptile\$1 or bird\$1  
4 or mammal\* or dog or dogs or canine\$1 or cat or cats or hyrax\* or marsupial\* or monotrem\* or  
5 scandentia or bat or bats or carnivor\* or cetacea or edentata\* or elephant\* or insect or insects or  
6 insectivore or lagomorph\* or rodent\$2 or mouse or mice or murine or murinae or muridae or rat or rats or  
7 pig or pigs or piglet\$1 or swine or rabbit\$1 or sheep\$1 or goat\$1 or horse\$1 or equus or cow or cows or  
8 cattle or calf or calves or bovine or sirenia or ungulate\$1 or primate\$1 or prosimian\* or haplorhini\* or  
9 tarsiiiform\* or simian\* or platyrrhini or catarrhini or cercopithecidae or ape or apes or hylobatidae or  
10 hominid\* or chimpanzee\* or gorilla\* or orangutan\* or monkey or monkeys or ape or apes).tw. (4149175)  
11  
12

13  
14 20 (preclinic\$ or pre clinic\$).tw. (72274)  
15

16 21 or/18-20 (6474971)  
17

18 22 17 and 21 (6511)  
19

20 23 6 or 22 (6545)  
21  
22  
23  
24  
25  
26  
27  
28  
29  
30  
31  
32  
33  
34  
35  
36  
37  
38  
39  
40  
41  
42  
43  
44  
45  
46  
47  
48  
49  
50  
51  
52  
53  
54  
55  
56  
57  
58  
59  
60

1  
2  
3  
4  
5  
6  
7  
8  
9  
10  
11  
12  
13  
14  
15  
16  
17  
18  
19  
20  
21  
22  
23  
24  
25  
26  
27  
28  
29  
30  
31  
32  
33  
34  
35  
36  
37  
38  
39  
40  
41  
42  
43  
44  
45  
46  
47

**Supplemental Table 1. Clinical Study Characteristics**

| Author, Year     | Country                            | Year Study Conducted | Study Type                                       | Type of Cancer                              | Primary Outcomes                                                                                   | Secondary Outcomes                                                                                           |
|------------------|------------------------------------|----------------------|--------------------------------------------------|---------------------------------------------|----------------------------------------------------------------------------------------------------|--------------------------------------------------------------------------------------------------------------|
| Andtbacka, 2015  | USA, UK, Canada and South Africa   | 2009-2014            | Interventional; Randomized (OPTiM Trial)         | Melanoma                                    | Efficacy: DRR                                                                                      | Efficacy: ORR<br>OS<br>Best Overall Response<br>Onset and duration of response<br>Time to treatment failure  |
| Long 2015        | USA, Australia, Switzerland, Spain | 2014-2022            | Interventional: Non-randomized, No control       | Melanoma                                    | Safety: Dose Limiting Toxicities                                                                   | Efficacy: DRR<br>OS<br>Progression Free Survival<br>Safety: AEs                                              |
| Puzanov, 2015    | USA                                | 2013-2014            | Interventional: Non-Randomized                   | Melanoma                                    | Safety: Dose Limiting Toxicities                                                                   | Efficacy: ORR<br>Safety: Grade ≥3 AEs                                                                        |
| Chang, 2012      | USA                                | 2006-2008            | Interventional: Non-randomized, No control       | Pancreatic Cancer                           | Efficacy: Detection of T-VEC in blood and urine<br>Presence of Anti-HSV1 Antibodies<br>Safety: AEs | Efficacy: ORR<br>Change in sum of longest tumor diameter<br>Change in pain intensity                         |
| Harrington, 2010 | UK                                 | 2005-2010            | Interventional: Non-randomized, No control       | Squamous Cell Carcinoma                     | Safety: AEs                                                                                        | Efficacy: Antitumor Activity<br>OS*<br>Complete Response*<br>Partial Response*<br>Progression Free Survival* |
| Senzer 2009      | USA                                | 2005-2008            | Interventional; (non-controlled, non randomized) | Melanoma                                    | Efficacy: ORR                                                                                      | Efficacy: OS<br>Safety: AEs                                                                                  |
| Hu, 2006         | USA, UK                            | ---                  | Interventional: Non-randomized, No control       | Breast, Colorectal, Melanoma, Head and Neck | Efficacy: Biodistribution<br>Safety: AEs                                                           | Efficacy: GM-CSF expression<br>HSV antigen associated necrosis<br>Viral Replication<br>Local Reactions       |

---: Not Reported  
\*: not reported a priori  
AEs - adverse events; CHN- cutaneous head and neck; DRR – durable response rate; ECOG – Eastern Cooperative Oncology Group; ORR- objective response rate; OS – overall survival

**Supplemental Table 2. Clinical Patient Characteristics**

| Author, Year     | Group                        | Patients (N) | Median Age (range) | Sex (n; F) | Metastasis Stage (n; Stage IVM1b/c) | Line of Therapy (n; first line) | HSV Serostatus (n; Seropositive, n; unknown) |
|------------------|------------------------------|--------------|--------------------|------------|-------------------------------------|---------------------------------|----------------------------------------------|
| Andtbacka, 2015  | T-VEC                        | 295          | 63 (22-94)         | 122        | 131                                 | 138                             | 175, 23                                      |
| Long, 2015       | T-VEC + Pembrolizumab        | 21           | 58                 | 13         | 11                                  | ---                             | ---                                          |
| Puzanov, 2015    | T-VEC + Ipilimumab           | 18           | ---                | ---        | ---                                 | 18                              | ---                                          |
| Chang, 2012      | T-VEC                        | 17           | 54                 | 6          | ---                                 | ---                             | ---                                          |
| Harrington, 2010 | T-VEC and Chemo radiotherapy | 17           | 58 (41-74)         | 2          | 3                                   | ---                             | ---                                          |
| Senzer, 2009     | T-VEC                        | 50           | 62 (34-88)         | 28         | 24                                  | 0                               | 36, 1                                        |
| Hu, 2006         | T-VEC                        | 30           | 55 (30-80)         | 23         | ---                                 | 0                               | 19                                           |

--- : Not Reported

**Supplemental Table 3. Clinical Intervention and Comparator Characteristics**

| Author, Year     | Arm                | Dose 1                              | Time of Dose 1 | Frequency of Dose 1         | Dose 2                              | Time of Dose 2 | Frequency of Dose 2 | Dose 3             | Time of Dose 3 | Frequency of Dose 3 | Intervention Window                        | Follow Up Duration       |
|------------------|--------------------|-------------------------------------|----------------|-----------------------------|-------------------------------------|----------------|---------------------|--------------------|----------------|---------------------|--------------------------------------------|--------------------------|
| Andtbacka, 2015  | T-VEC              | 10 <sup>6</sup> PFU/ml (≤4ml)       | Week 1         | single                      | 10 <sup>8</sup> PFU/ml (≤4ml)       | Week 4         | Q2W                 | N/A                | N/A            | N/A                 | Median: 23 wks (0.1-79 wks)                | Median: 44 mo (32-58 mo) |
|                  | GM-CSF             | 125 µg/m <sup>2</sup>               | Week 1         | Once daily 14/28 day cycles | N/A                                 | N/A            | N/A                 | N/A                | N/A            | N/A                 | Median: 10 wks (0.6 to 72 wks)             | ---                      |
| Long, 2015       | T-VEC + Pemb.      | TVEC: 10 <sup>6</sup> PFU/ml        | Day 1          | single                      | T-VEC: 10 <sup>8</sup> PFU/ml       | Day 22         | Q2W                 | Pemb: 200 mg       | Day 36         | Q2W                 | Median TVEC: 13 wks<br>Median Pemb: 10 wks | ---                      |
| Puzanov, 2015    | T-VEC + Ipilimumab | TVEC: 10 <sup>6</sup> PFU/ml (≤4ml) | Week 1         | single                      | TVEC: 10 <sup>8</sup> PFU/ml (≤4ml) | Week 4         | Q2W                 | Ipilimumab: 3mg/kg | Week 6         | Q3W                 | TVEC: until DLT<br>Ipi: 12 wks             | 17 mo minimum            |
| Chang, 2012      | Cohort 1           | 10 <sup>4</sup> PFU/ml              | Week 1*        | single                      | 10 <sup>5</sup> PFU/ml              | Week 4*        | Q3W*                | N/A                | N/A            | N/A                 | up to 15 wks                               | ---                      |
|                  | Cohort 2           | 10 <sup>5</sup> PFU/ml              | Week 1         | single                      | 10 <sup>6</sup> PFU/ml              | Week 4         | Q3W                 | N/A                | N/A            | N/A                 | up to 15 wks                               | ---                      |
|                  | Cohort 3           | 10 <sup>6</sup> PFU/ml              | Week 1         | single                      | 10 <sup>7</sup> PFU/ml              | Week 4         | Q3W                 | N/A                | N/A            | N/A                 | up to 15 wks                               | ---                      |
| Harrington, 2010 | Cohort 1           | T-VEC: 10 <sup>6</sup> PFU/ml       | Day 1          | Q3W                         | Cisplatin: 100mg/m <sup>2</sup>     | Day 1          | Q3W                 | N/A                | N/A            | N/A                 | Up to 9 weeks                              | Median:                  |

|              |                     |                               |        |        |                               |        |       |                                 |       |     |                               |                            |
|--------------|---------------------|-------------------------------|--------|--------|-------------------------------|--------|-------|---------------------------------|-------|-----|-------------------------------|----------------------------|
|              |                     |                               |        |        |                               |        |       |                                 |       |     |                               | 29mo (19-40mo)             |
|              | Cohort 2            | T-VEC: 10 <sup>6</sup> PFU/ml | Day 1  | single | T-VEC: 10 <sup>7</sup> PFU/ml | Day 22 | Q3W   | Cisplatin: 100mg/m <sup>2</sup> | Day 1 | Q3W | Up to 9 weeks                 | Median: 29mo (19-40mo)     |
|              | Cohort 3            | T-VEC: 10 <sup>6</sup> PFU/ml | Day 1  | single | T-VEC: 10 <sup>8</sup> PFU/ml | Day 22 | Q3W   | Cisplatin: 100mg/m <sup>2</sup> | Day 1 | Q3W | Up to 9 weeks                 | Median: 29mo (19-40mo)     |
|              | Cohort 4            | T-VEC: 10 <sup>6</sup> PFU/ml | Day 1  | single | T-VEC: 10 <sup>8</sup> PFU/ml | Day 22 | Q3W   | Cisplatin: 100mg/m <sup>2</sup> | Day 1 | Q3W | Up to 9 weeks                 | Median: 29mo (19-40mo)     |
| Senzer, 2009 | T-VEC               | 10 <sup>6</sup> PFU/ml (≤4ml) | Week 1 | Single | 10 <sup>8</sup> PFU/ml (≤4ml) | Week 4 | Q2W   | N/A                             | N/A   | N/A | Max: 48 wks<br>Median: 11 wks | Median: 18 mo (11-36 mo)   |
| Hu, 2006     | Single Dose Group 1 | 10 <sup>6</sup> PFU/ml        | ---    | single | N/A                           | N/A    | N/A   | N/A                             | N/A   | N/A | Single dose                   | 6 wks                      |
|              | Single Dose Group 2 | 10 <sup>7</sup> PFU/ml        | ---    | single | N/A                           | N/A    | N/A   | N/A                             | N/A   | N/A | Single dose                   | 6 wks                      |
|              | Single Dose Group 3 | 10 <sup>8</sup> PFU/ml        | ---    | single | N/A                           | N/A    | N/A   | N/A                             | N/A   | N/A | Single dose                   | 6 wks                      |
|              | Multi-dose Group 1  | 10 <sup>6</sup> PFU/ml        | ---    | single | 10 <sup>7</sup> PFU/ml        | ---    | Q1-3W | N/A                             | N/A   | N/A | 3-9 wks*                      | 6 wks post final injection |
|              | Multi-dose Group 2  | 10 <sup>6</sup> PFU/ml        | ---    | single | 10 <sup>8</sup> PFU/ml        | ---    | Q1-3W | N/A                             | N/A   | N/A | 3-9 wks*                      | 6 wks post final injection |
|              | Multi-dose Group 3  | 10 <sup>8</sup> PFU/ml        | ---    | Q1-3W  | N/A                           | N/A    | N/A   | N/A                             | N/A   | N/A | 3-9 wks*                      | 6wks post final injection  |

DLT: Dose Limiting Toxicity; Pemb: Pembrolizumab; Q2W: every two weeks Q3W: every three weeks; Q1-3W: every 1-3 weeks; Q6W every 6 weeks  
 --- : not reported  
 T-VEC was given by intra-tumoral injection in all studies

Supplemental Table 4. Preclinical Study Characteristics

| Author, Year   | Year Study Conducted | Country | Study Design                   | Species | Strain  | Model               | Type of Cancer | Baseline Tumor Size | Gender | Mean Age | Mean Weight | Co-Interventions | Duration of Follow Up |
|----------------|----------------------|---------|--------------------------------|---------|---------|---------------------|----------------|---------------------|--------|----------|-------------|------------------|-----------------------|
| Cooke, 2015    | ---                  | USA     | Interventional; Non-Controlled | Mouse   | Balb/c  | A20 Murine Lymphoma | Lymphoma       | 150 mm <sup>3</sup> | Female | ---      | ---         | N/A              | ---                   |
| Piasecki, 2015 | ---                  | ---     | Controlled Comparison          | Mouse   | C57Bl/6 | Syngeneic MC-38     | Colon Cancer   | ---                 | ---    | ---      | ---         | Anti-PD-1        | ---                   |

|                |      |     |                       |       |        |                                   |          |                 |     |     |     |                             |         |
|----------------|------|-----|-----------------------|-------|--------|-----------------------------------|----------|-----------------|-----|-----|-----|-----------------------------|---------|
|                |      |     |                       |       |        | Colon Carcinoma                   |          |                 |     |     |     |                             |         |
| Piasecki, 2013 | ---  | --- | Controlled Comparison | Mouse | ---    | A20 Syngeneic Contralateral Model | Lymphoma | ---             | --- | --- | --- | N/A                         | 10 days |
| Liu, 2003      | 2002 | UK  | Controlled Comparison | Mouse | Balb/c | Syngeneic A20 Lymphoma            | Lymphoma | 0.5 cm diameter | --- | --- | --- | Immunization wild type HSV1 | 35 days |

---: not reported

N/A: not applicable

Cooke, 2016 did not provide any relevant information

**Supplemental Table 5. Preclinical Intervention and Comparator Characteristics**

| Author, Year   | Experiment | Group                           | N   | Dose 1                        | Frequency Dose 1 | Duration Dose 1  | Dose 2         | Frequency Dose 2 | Duration Dose 2 | Dose 3 | Frequency Dose 3 | Duration Dose 3 |
|----------------|------------|---------------------------------|-----|-------------------------------|------------------|------------------|----------------|------------------|-----------------|--------|------------------|-----------------|
| Cooke, 2015    | 1          | Cohort 1: TVEC                  | 10  | 3x10 <sup>4</sup> PFU         | ---              | ---              | N/A            | N/A              | N/A             | N/A    | N/A              | N/A             |
|                |            | Cohort 2:                       | 10  | ---                           | ---              | ---              | N/A            | N/A              | N/A             | N/A    | N/A              | N/A             |
|                |            | Cohort 3: TVEC                  | 10  | 3x10 <sup>6</sup> PFU         | Every 3 days     | 1 week           | N/A            | N/A              | N/A             | N/A    | N/A              | N/A             |
|                |            | Cohort 4:                       | 10  | ---                           | ---              | ---              | N/A            | N/A              | N/A             | N/A    | N/A              | N/A             |
| Piasecki, 2015 | 1          | Int: OncoVEXmuGM-CSF + Anti-PD1 | --- | T-VEC: ---                    | Every 3 days     | 3 doses          | Anti-PD-1: --- | Twice per wk     | ---             | N/A    | N/A              | N/A             |
|                |            | Int: OncoVEXmuGM-CSF            | --- | T-VEC: ---                    | ---              | ---              | ---            | ---              | ---             | ---    | ---              | ---             |
|                |            | Con: Anti-PD-1                  | --- | Anti-PD-1: ---                | ---              | ---              | ---            | ---              | ---             | ---    | ---              | ---             |
| Piasecki, 2013 | 1          | Int: T-VEC                      | --- | 5x10 <sup>6</sup> PFU         | single           | single           | N/A            | N/A              | N/A             | N/A    | N/A              | N/A             |
|                |            | Con: Vehicle                    | --- | ---                           | single           | single           | N/A            | N/A              | N/A             | N/A    | N/A              | N/A             |
| Liu, 2003      | 1          | Int: JS1/34.5-/47-/mGM-CSF      | 10  | 10 <sup>6</sup> PFU/ml (50µl) | Every other day  | 3 doses – 5 days | N/A            | N/A              | N/A             | N/A    | N/A              | N/A             |
|                |            |                                 | 10  | 10 <sup>7</sup> PFU/ml (50µl) | Every other day  | 3 doses – 5 days | N/A            | N/A              | N/A             | N/A    | N/A              | N/A             |
|                |            |                                 | 10  | 10 <sup>8</sup> PFU/ml (50µl) | Every other day  | 3 doses – 5 days | N/A            | N/A              | N/A             | N/A    | N/A              | N/A             |



1  
2  
3  
4  
5  
6  
7  
8  
9  
10  
11  
12  
13  
14  
15  
16  
17  
18  
19  
20  
21  
22  
23  
24  
25  
26  
27  
28  
29  
30  
31  
32  
33  
34  
35  
36  
37  
38  
39  
40  
41  
42  
43  
44  
45  
46  
47

|   |                            |    |                               |                 |                  |     |     |     |     |     |     |
|---|----------------------------|----|-------------------------------|-----------------|------------------|-----|-----|-----|-----|-----|-----|
|   | Int: JS1/34.5-/47-         | 10 | 10 <sup>6</sup> PFU/ml (50µl) | Every other day | 3 doses – 5 days | N/A | N/A | N/A | N/A | N/A | N/A |
|   |                            | 10 | 10 <sup>7</sup> PFU/ml (50µl) | Every other day | 3 doses – 5 days | N/A | N/A | N/A | N/A | N/A | N/A |
|   |                            | 10 | 10 <sup>8</sup> PFU/ml (50µl) | Every other day | 3 doses – 5 days | N/A | N/A | N/A | N/A | N/A | N/A |
|   | Con: vehicle               | 10 | 50µl                          | Every other day | 3 doses – 5 days | N/A | N/A | N/A | N/A | N/A | N/A |
| 2 | Int: JS1/34.5-/47-/mGM-CSF | 10 | 10 <sup>8</sup> PFU/ml (50µl) | Every other day | 3 doses – 5 days | N/A | N/A | N/A | N/A | N/A | N/A |
|   | Con: Vehicle               | 10 | 50µl                          | Every other day | 3 doses – 5 days | N/A | N/A | N/A | N/A | N/A | N/A |

All doses of T-VEC were given by injection intratumorally  
 ---: not reported  
 Int: intervention; Con: control; wk: week; PFU: plaque forming units  
 Cooke, 2016 did not provide any relevant information

**Supplemental Table 6. Preclinical Efficacy Data**

| Author, Year   | Experiment | Group                            | N – Animals Studied | N – Lesions Studied | Baseline Mean Tumor Measure (Standard Error of Mean) | Final Mean Tumor Measure (Standard Error of Mean) | CR - Injected | CR - Contralateral | Duration of Follow Up |
|----------------|------------|----------------------------------|---------------------|---------------------|------------------------------------------------------|---------------------------------------------------|---------------|--------------------|-----------------------|
| Cooke, 2015    | 1          | INT: TVEC 3x10 <sup>4</sup> PFU  | 10                  | ---                 | ---                                                  | ---                                               | ---           | ---                | ---                   |
|                |            | INT: TVEC 3x10 <sup>6</sup> PFU  | 10                  | 10                  | ~150mm <sup>3</sup>                                  | ---                                               | 10/10         | 5/10               | ---                   |
|                |            | ---                              | 10                  | ---                 | ---                                                  | ---                                               | ---           | ---                | ---                   |
|                |            | ---                              | 10                  | ---                 | ---                                                  | ---                                               | ---           | ---                | ---                   |
| Piasecki, 2015 | 1          | INT: OncoVexmuGM-CSF             | ---                 | ---                 | ---                                                  | ---                                               | ---           | ---                | ---                   |
|                |            | INT: OncoVexmuGM-CSF + Anti-PD-1 | ---                 | 20                  | ---                                                  | ---                                               | 8/10          | 2/10               | ---                   |
|                |            | CON: Anti Pd-1                   | ---                 | ---                 | ---                                                  | ---                                               | ---           | ---                | ---                   |
| Piasecki, 2013 | 1          | INT: T-VEC                       | ---                 | ---                 | ---                                                  | ---                                               | 70-100%       | 50-60%             | 10 days               |
|                |            | CON: Vehicle                     | ---                 | ---                 | ---                                                  | ---                                               | ---           | ---                | ---                   |

|           |   |                                                  |                             |     |              |                |     |     |         |
|-----------|---|--------------------------------------------------|-----------------------------|-----|--------------|----------------|-----|-----|---------|
| Liu, 2003 | 1 | INT:<br>JS1/34.5-/47-<br>/mGM-CSF;<br>injected   | 10                          | N/A | 5.2mm (0.34) | 0.004mm (0.31) | N/A | N/A | 22 days |
|           |   | INT:<br>JS1/34.5-/47-<br>/mGM-CSF;<br>uninjected | 10<br>(same as<br>injected) | N/A | 5.7mm (0.29) | 1.1 mm (0.73)  | N/A | N/A | 22 days |
|           |   | INT:<br>JS1/34.5-/47-;<br>injected               | 10                          | N/A | 5.4mm (0.37) | 1.4 mm (1.36)  | N/A | N/A | 22 days |
|           |   | INT:<br>JS1/34.5-/47-;<br>uninjected             | 10<br>(same as<br>injected) | N/A | 6.2mm (0.29) | 5.4mm (2.01)   | N/A | N/A | 22 days |
|           |   | CON:<br>Vehicle; injected                        | 10                          | N/A | 5.4mm (0.40) | 11.9mm (2.69)  | N/A | N/A | 22 days |
|           |   | CON:<br>Vehicle;<br>uninjected                   | 10<br>(same as<br>injected) | N/A | 5.6mm (0.46) | 13.2mm (2.76)  | N/A | N/A | 22 days |
|           | 2 | INT:<br>JS1/34.5-/47-<br>/mGM-CSF                | 10                          | N/A | 5.5mm (0.34) | 2.2mm (1.6)    | N/A | N/A | 21 days |
|           |   | CON: Vehicle                                     | 10                          | N/A | 5.6mm (0.23) | 13.8mm (1.2)   | N/A | N/A | 21 days |

--- : not reported

INT: intervention

CON: control

Liu 2003 data from experiment 1 taken from 10<sup>8</sup> dose

Cooke, 2016 did not provide any relevant information

## S3. PRISMA Checklist

| Section/topic             | #  | Checklist item                                                                                                                                                                                                                                                                                              | Reported on page # |
|---------------------------|----|-------------------------------------------------------------------------------------------------------------------------------------------------------------------------------------------------------------------------------------------------------------------------------------------------------------|--------------------|
| <b>TITLE</b>              |    |                                                                                                                                                                                                                                                                                                             |                    |
| Title                     | 1  | Identify the report as a systematic review, meta-analysis, or both.                                                                                                                                                                                                                                         | 1                  |
| <b>ABSTRACT</b>           |    |                                                                                                                                                                                                                                                                                                             |                    |
| Structured summary        | 2  | Provide a structured summary including, as applicable: background; objectives; data sources; study eligibility criteria, participants, and interventions; study appraisal and synthesis methods; results; limitations; conclusions and implications of key findings; systematic review registration number. | 2                  |
| <b>INTRODUCTION</b>       |    |                                                                                                                                                                                                                                                                                                             |                    |
| Rationale                 | 3  | Describe the rationale for the review in the context of what is already known.                                                                                                                                                                                                                              | 4                  |
| Objectives                | 4  | Provide an explicit statement of questions being addressed with reference to participants, interventions, comparisons, outcomes, and study design (PICOS).                                                                                                                                                  | 4                  |
| <b>METHODS</b>            |    |                                                                                                                                                                                                                                                                                                             |                    |
| Protocol and registration | 5  | Indicate if a review protocol exists, if and where it can be accessed (e.g., Web address), and, if available, provide registration information including registration number.                                                                                                                               | 5                  |
| Eligibility criteria      | 6  | Specify study characteristics (e.g., PICOS, length of follow-up) and report characteristics (e.g., years considered, language, publication status) used as criteria for eligibility, giving rationale.                                                                                                      | 5                  |
| Information sources       | 7  | Describe all information sources (e.g., databases with dates of coverage, contact with study authors to identify additional studies) in the search and date last searched.                                                                                                                                  | 6                  |
| Search                    | 8  | Present full electronic search strategy for at least one database, including any limits used, such that it could be repeated.                                                                                                                                                                               | 6                  |
| Study selection           | 9  | State the process for selecting studies (i.e., screening, eligibility, included in systematic review, and, if applicable, included in the meta-analysis).                                                                                                                                                   | 6                  |
| Data collection process   | 10 | Describe method of data extraction from reports (e.g., piloted forms, independently, in duplicate) and any processes for obtaining and confirming data from investigators.                                                                                                                                  | 7                  |
| Data items                | 11 | List and define all variables for which data were sought (e.g., PICOS, funding sources) and any assumptions and simplifications made.                                                                                                                                                                       | 7                  |

|                                    |    |                                                                                                                                                                                                                        |     |
|------------------------------------|----|------------------------------------------------------------------------------------------------------------------------------------------------------------------------------------------------------------------------|-----|
| Risk of bias in individual studies | 12 | Describe methods used for assessing risk of bias of individual studies (including specification of whether this was done at the study or outcome level), and how this information is to be used in any data synthesis. | 7-8 |
| Summary measures                   | 13 | State the principal summary measures (e.g., risk ratio, difference in means).                                                                                                                                          | 8   |
| Synthesis of results               | 14 | Describe the methods of handling data and combining results of studies, if done, including measures of consistency (e.g., $I^2$ ) for each meta-analysis.                                                              | N/A |

| Section/topic                 | #  | Checklist item                                                                                                                                                                                           | Reported on page # |
|-------------------------------|----|----------------------------------------------------------------------------------------------------------------------------------------------------------------------------------------------------------|--------------------|
| Risk of bias across studies   | 15 | Specify any assessment of risk of bias that may affect the cumulative evidence (e.g., publication bias, selective reporting within studies).                                                             | 7                  |
| Additional analyses           | 16 | Describe methods of additional analyses (e.g., sensitivity or subgroup analyses, meta-regression), if done, indicating which were pre-specified.                                                         | N/A                |
| <b>RESULTS</b>                |    |                                                                                                                                                                                                          |                    |
| Study selection               | 17 | Give numbers of studies screened, assessed for eligibility, and included in the review, with reasons for exclusions at each stage, ideally with a flow diagram.                                          | 8                  |
| Study characteristics         | 18 | For each study, present characteristics for which data were extracted (e.g., study size, PICOS, follow-up period) and provide the citations.                                                             | 8-9                |
| Risk of bias within studies   | 19 | Present data on risk of bias of each study and, if available, any outcome level assessment (see item 12).                                                                                                | 14-15              |
| Results of individual studies | 20 | For all outcomes considered (benefits or harms), present, for each study: (a) simple summary data for each intervention group (b) effect estimates and confidence intervals, ideally with a forest plot. | 13-14              |
| Synthesis of results          | 21 | Present results of each meta-analysis done, including confidence intervals and measures of consistency.                                                                                                  | N/A                |
| Risk of bias across studies   | 22 | Present results of any assessment of risk of bias across studies (see Item 15).                                                                                                                          | 14-15              |
| Additional analysis           | 23 | Give results of additional analyses, if done (e.g., sensitivity or subgroup analyses, meta-regression [see Item 16]).                                                                                    | N/A                |
| <b>DISCUSSION</b>             |    |                                                                                                                                                                                                          |                    |
| Summary of evidence           | 24 | Summarize the main findings including the strength of evidence for each main outcome; consider their relevance to key groups (e.g., healthcare providers, users, and policy makers).                     | 17-18              |
| Limitations                   | 25 | Discuss limitations at study and outcome level (e.g., risk of bias), and at review-level (e.g., incomplete retrieval of identified research, reporting bias).                                            | 18                 |

1  
2  
3  
4  
5  
6  
7  
8  
9  
10  
11  
12  
13  
14  
15  
16  
17  
18  
19  
20  
21  
22  
23  
24  
25  
26  
27  
28  
29  
30  
31  
32  
33  
34  
35  
36  
37  
38  
39  
40  
41  
42  
43  
44  
45  
46  
47

|                |    |                                                                                                                                            |              |
|----------------|----|--------------------------------------------------------------------------------------------------------------------------------------------|--------------|
| Conclusions    | 26 | Provide a general interpretation of the results in the context of other evidence, and implications for future research.                    | 19           |
| <b>FUNDING</b> |    |                                                                                                                                            |              |
| Funding        | 27 | Describe sources of funding for the systematic review and other support (e.g., supply of data); role of funders for the systematic review. | Given online |

For peer review only

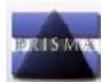

# PRISMA 2009 Checklist

| Section/topic                      | #  | Checklist item                                                                                                                                                                                                                                                                                              | Reported on page # |
|------------------------------------|----|-------------------------------------------------------------------------------------------------------------------------------------------------------------------------------------------------------------------------------------------------------------------------------------------------------------|--------------------|
| <b>TITLE</b>                       |    |                                                                                                                                                                                                                                                                                                             |                    |
| Title                              | 1  | Identify the report as a systematic review, meta-analysis, or both.                                                                                                                                                                                                                                         | 1                  |
| <b>ABSTRACT</b>                    |    |                                                                                                                                                                                                                                                                                                             |                    |
| Structured summary                 | 2  | Provide a structured summary including, as applicable: background; objectives; data sources; study eligibility criteria, participants, and interventions; study appraisal and synthesis methods; results; limitations; conclusions and implications of key findings; systematic review registration number. | 2-3                |
| <b>INTRODUCTION</b>                |    |                                                                                                                                                                                                                                                                                                             |                    |
| Rationale                          | 3  | Describe the rationale for the review in the context of what is already known.                                                                                                                                                                                                                              | 3                  |
| Objectives                         | 4  | Provide an explicit statement of questions being addressed with reference to participants, interventions, comparisons, outcomes, and study design (PICOS).                                                                                                                                                  | 3                  |
| <b>METHODS</b>                     |    |                                                                                                                                                                                                                                                                                                             |                    |
| Protocol and registration          | 5  | Indicate if a review protocol exists, if and where it can be accessed (e.g., Web address), and, if available, provide registration information including registration number.                                                                                                                               | 4                  |
| Eligibility criteria               | 6  | Specify study characteristics (e.g., PICOS, length of follow-up) and report characteristics (e.g., years considered, language, publication status) used as criteria for eligibility, giving rationale.                                                                                                      | 4                  |
| Information sources                | 7  | Describe all information sources (e.g., databases with dates of coverage, contact with study authors to identify additional studies) in the search and date last searched.                                                                                                                                  | 5                  |
| Search                             | 8  | Present full electronic search strategy for at least one database, including any limits used, such that it could be repeated.                                                                                                                                                                               | 5                  |
| Study selection                    | 9  | State the process for selecting studies (i.e., screening, eligibility, included in systematic review, and, if applicable, included in the meta-analysis).                                                                                                                                                   | 5                  |
| Data collection process            | 10 | Describe method of data extraction from reports (e.g., piloted forms, independently, in duplicate) and any processes for obtaining and confirming data from investigators.                                                                                                                                  | 5-6                |
| Data items                         | 11 | List and define all variables for which data were sought (e.g., PICOS, funding sources) and any assumptions and simplifications made.                                                                                                                                                                       | 5-6                |
| Risk of bias in individual studies | 12 | Describe methods used for assessing risk of bias of individual studies (including specification of whether this was done at the study or outcome level), and how this information is to be used in any data synthesis.                                                                                      | 6                  |
| Summary measures                   | 13 | State the principal summary measures (e.g., risk ratio, difference in means).                                                                                                                                                                                                                               | 7                  |
| Synthesis of results               | 14 | Describe the methods of handling data and combining results of studies, if done, including measures of consistency (e.g., I <sup>2</sup> ) for each meta-analysis.                                                                                                                                          | 7                  |

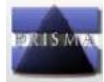

# PRISMA 2009 Checklist

Page 1 of 2

| Section/topic                 | #  | Checklist item                                                                                                                                                                                           | Reported on page # |
|-------------------------------|----|----------------------------------------------------------------------------------------------------------------------------------------------------------------------------------------------------------|--------------------|
| Risk of bias across studies   | 15 | Specify any assessment of risk of bias that may affect the cumulative evidence (e.g., publication bias, selective reporting within studies).                                                             | 6                  |
| Additional analyses           | 16 | Describe methods of additional analyses (e.g., sensitivity or subgroup analyses, meta-regression), if done, indicating which were pre-specified.                                                         | N/A                |
| <b>RESULTS</b>                |    |                                                                                                                                                                                                          |                    |
| Study selection               | 17 | Give numbers of studies screened, assessed for eligibility, and included in the review, with reasons for exclusions at each stage, ideally with a flow diagram.                                          | 7                  |
| Study characteristics         | 18 | For each study, present characteristics for which data were extracted (e.g., study size, PICOS, follow-up period) and provide the citations.                                                             | 7-8                |
| Risk of bias within studies   | 19 | Present data on risk of bias of each study and, if available, any outcome level assessment (see item 12).                                                                                                | 9-10               |
| Results of individual studies | 20 | For all outcomes considered (benefits or harms), present, for each study: (a) simple summary data for each intervention group (b) effect estimates and confidence intervals, ideally with a forest plot. | 8-9                |
| Synthesis of results          | 21 | Present results of each meta-analysis done, including confidence intervals and measures of consistency.                                                                                                  | 8-9                |
| Risk of bias across studies   | 22 | Present results of any assessment of risk of bias across studies (see Item 15).                                                                                                                          | 9-10               |
| Additional analysis           | 23 | Give results of additional analyses, if done (e.g., sensitivity or subgroup analyses, meta-regression [see Item 16]).                                                                                    | N/A                |
| <b>DISCUSSION</b>             |    |                                                                                                                                                                                                          |                    |
| Summary of evidence           | 24 | Summarize the main findings including the strength of evidence for each main outcome; consider their relevance to key groups (e.g., healthcare providers, users, and policy makers).                     | 11-12              |
| Limitations                   | 25 | Discuss limitations at study and outcome level (e.g., risk of bias), and at review-level (e.g., incomplete retrieval of identified research, reporting bias).                                            | 12-13              |
| Conclusions                   | 26 | Provide a general interpretation of the results in the context of other evidence, and implications for future research.                                                                                  | 13                 |
| <b>FUNDING</b>                |    |                                                                                                                                                                                                          |                    |
| Funding                       | 27 | Describe sources of funding for the systematic review and other support (e.g., supply of data); role of funders for the systematic review.                                                               | 14                 |

From: Moher D, Liberati A, Tetzlaff J, Altman DG, The PRISMA Group (2009). Preferred Reporting Items for Systematic Reviews and Meta-Analyses: The PRISMA Statement. PLoS Med 6(7): e1000097. doi:10.1371/journal.pmed1000097

For more information, visit: [www.prisma-statement.org](http://www.prisma-statement.org).

Page 2 of 2

For peer review only - <http://bmjopen.bmj.com/site/about/guidelines.xhtml>

# BMJ Open

## Mapping the preclinical to clinical evidence and development trajectory of the oncolytic virus talimogene laherparepvec (T-VEC): a systematic review

|                                 |                                                                                                                                                                                                                                                                                                                                                                                                                                                                                                                                        |
|---------------------------------|----------------------------------------------------------------------------------------------------------------------------------------------------------------------------------------------------------------------------------------------------------------------------------------------------------------------------------------------------------------------------------------------------------------------------------------------------------------------------------------------------------------------------------------|
| Journal:                        | <i>BMJ Open</i>                                                                                                                                                                                                                                                                                                                                                                                                                                                                                                                        |
| Manuscript ID                   | bmjopen-2019-029475.R1                                                                                                                                                                                                                                                                                                                                                                                                                                                                                                                 |
| Article Type:                   | Original research                                                                                                                                                                                                                                                                                                                                                                                                                                                                                                                      |
| Date Submitted by the Author:   | 20-Sep-2019                                                                                                                                                                                                                                                                                                                                                                                                                                                                                                                            |
| Complete List of Authors:       | Lalu, Manoj; Ottawa Hospital Research Institute, Clinical Epidemiology<br>Leung, Garvin; Ottawa Hospital Research Institute, Clinical Epidemiology<br>Dong, Yuan Yi; Ottawa Hospital Research Institute, Clinical Epidemiology<br>Montroy, Joshua; Ottawa Hospital Research Institute, Clinical Epidemiology<br>Butler, Claire; Ottawa Hospital Research Institute, Clinical Epidemiology<br>Auer, Rebecca; Ottawa Hospital Research Institute, Clinical Epidemiology<br>Fergusson, Dean; Ottawa Hospital Research Institute, Medicine |
| <b>Primary Subject Heading</b>: | Epidemiology                                                                                                                                                                                                                                                                                                                                                                                                                                                                                                                           |
| Secondary Subject Heading:      | Oncology                                                                                                                                                                                                                                                                                                                                                                                                                                                                                                                               |
| Keywords:                       | TVEC, oncolytic virus, cancer, translation, review                                                                                                                                                                                                                                                                                                                                                                                                                                                                                     |
|                                 |                                                                                                                                                                                                                                                                                                                                                                                                                                                                                                                                        |

SCHOLARONE™  
Manuscripts



1  
2  
3 **Mapping the preclinical to clinical evidence and development trajectory of the oncolytic**  
4 **virus talimogene laherparepvec (T-VEC): a systematic review**  
5  
6  
7

8 **Manoj M. Lalu† MD, PhD, FRCPC<sup>1,2,3,4</sup>, Garvin J. Leung† MPH<sup>2,5</sup>, Yuan Yi Dong<sup>2,5</sup>,**  
9 **Joshua Montroy MSc,<sup>2</sup> Claire Butler<sup>2</sup>, Rebecca C. Auer MD, MSc, FRCSC<sup>7,8</sup>,**  
10 **Dean A. Fergusson PhD, MHA<sup>\*2,6,7</sup>**  
11  
12  
13

14 <sup>1</sup>Department of Anesthesiology and Pain Medicine, The Ottawa Hospital, University of Ottawa,  
15 Ottawa, ON, Canada

16 <sup>2</sup>Blueprint Translational Research Group, Clinical Epidemiology Program, Ottawa Hospital  
17 Research Institute, Ottawa, ON, Canada

18 <sup>3</sup> Regenerative Medicine Program, Ottawa Hospital Research Institute, Ottawa, ON, Canada

19 <sup>4</sup>Department of Cellular and Molecular Medicine, University of Ottawa , Ottawa, ON, Canada

20 <sup>5</sup>Faculty of Medicine, University of Ottawa, Ottawa, ON, Canada

21 <sup>6</sup>School of Epidemiology and Public Health, University of Ottawa, Ottawa, ON, Canada

22 <sup>7</sup>Department of Surgery, The Ottawa Hospital, University of Ottawa, Ottawa, ON, Canada

23 <sup>8</sup>Cancer Therapeutics Program, Ottawa Hospital Research Institute, Ottawa, ON, Canada

24 † These authors contributed equally to this work  
25  
26  
27

28 Emails: MML: [mlalu@toh.ca](mailto:mlalu@toh.ca); GJL: [garvin.leung@uottawa.ca](mailto:garvin.leung@uottawa.ca); YYD: [ydong044@uottawa.ca](mailto:ydong044@uottawa.ca);  
29 JM: [jmontroy@ohri.ca](mailto:jmontroy@ohri.ca); CB: [clbutler@toh.ca](mailto:clbutler@toh.ca); RCA: [rauer@toh.ca](mailto:rauer@toh.ca); DAF: [dafergusson@ohri.ca](mailto:dafergusson@ohri.ca)  
30  
31

32 \*Corresponding author:

33 Dean A. Fergusson email: [dafergusson@ohri.ca](mailto:dafergusson@ohri.ca)

34 Centre for Practice-Changing Research,

35 Office L1298a

36 501 Smyth Road, Box 201B

37 Ottawa, Ontario, Canada K1H 8L6

38 Tel. 1-613-737-8480

39 Fax. 1-613-739-6938  
40  
41  
42  
43  
44

45 Running Head: The efficacy of T-VEC: A systematic review  
46  
47

48 Word count: 2631  
49  
50  
51  
52  
53  
54  
55  
56  
57  
58  
59  
60

## ABSTRACT

**Objective:** This study aimed to conduct a systematic review of preclinical and clinical evidence to chart the successful trajectory of Talimogene laherparepvec (T-VEC), from the bench to the clinic.

**Design:** This study was a systematic review. The primary outcome of interest was the efficacy of treatment, determined by complete response. Abstract and full-text selection as well as data extraction was done by two independent reviewers. The Cochrane risk of bias tool was used to assess the risk of bias in studies.

**Setting:** Embase, Embase Classic, and OvidMedline were searched from inception until May 2016 to assess its development trajectory to approval in 2015.

**Participants:** Preclinical and clinical controlled comparison studies, as well as observational studies.

**Interventions:** T-VEC for treatment of any malignancy.

**Results:** 8,852 records were screened and five preclinical (n=150 animals) and seven clinical studies (n=589 patients) were included. We saw large decreases in T-VEC's efficacy as studies moved from the laboratory to patients, and as studies became more methodologically rigorous. Preclinical studies reported complete regression rates up to 100% for injected tumors and 80% for contralateral tumors, while the highest degree of efficacy seen in the clinical setting was a 24% complete response rate, with one study experiencing a complete response rate of 0%. We were unable to reliably assess safety due to the lack of reporting, as well as the heterogeneity seen in adverse event definitions. All preclinical studies had high or unclear risk of bias, and all clinical studies were at a high risk of bias in at least one domain.

1  
2  
3 **Conclusions:** Our findings illustrate that even successful biotherapeutics may not demonstrate a  
4 clear translational road map. This emphasizes the need to consider increasing rigour and  
5  
6  
7  
8 transparency along the translational pathway.  
9

10 **PROSPERO Registration Number:** CRD42016043541  
11

12  
13 **Keywords:** T-VEC, oncolytic virus, cancer, translation, review  
14  
15

### 16 17 18 19 **Strengths and limitations of this study** 20

- 21 • Comprehensive, up-to-date review of the efficacy and safety of T-VEC
- 22 • Threats to both internal validity and construct validity were performed
- 23 • Reporting of methods and findings was incomplete in most of the studies included
- 24 • Poor reporting and study design are major contributors to the ongoing reproducibility crisis
- 25  
26  
27  
28  
29  
30  
31  
32 in preclinical research  
33  
34  
35  
36  
37  
38  
39  
40  
41  
42  
43  
44  
45  
46  
47  
48  
49  
50  
51  
52  
53  
54  
55  
56  
57  
58  
59  
60

## BACKGROUND

Preclinical research receives approximately half of the world's biomedical research funding, yet very few of its findings translate clinically. This represents an enormous waste of resources with an estimated 28 billion dollars per year in the US alone being spent on biomedical research which is not reproducible and therefore not translatable.(1) One study found that only 5% of highly efficacious preclinical therapeutics were clinically translated.(2) These successes often take almost twenty years to become successfully translated across the research spectrum. (2, 3)

Although the process of clinical translation is complicated, the transition from bench-to-bedside often starts with preclinical research. These investigations (usually on animals or cells), are aimed at studying efficacy, pharmacokinetics and dynamics, as well as detailing safety.(4) Next, a drug is tested in a phase I clinical trial, which usually contains a small number of participants and is aimed at studying the safety of the drug. If a drug is safe, it may proceed to phase II which are larger than phase I studies and are designed to test safety, pharmacokinetics, pharmacodynamics, and optimal dosing regimens. They may also offer preliminary evidence of drug efficacy. Finally, a methodologically rigorous phase III study is performed. These studies are designed and powered to test efficacy in the patient population of interest (usually against a comparator such as placebo), as well as identify rarer adverse events which may have gone unnoticed in a smaller phase I or II study.(5)

Given the high failure rate in translating therapies across this spectrum, as well as significant time-lags associated with translation, it is important that we examine the few agents that have successfully crossed the preclinical-to-clinical bridge in order to learn from and replicate their success. Thus, we conducted a comprehensive evaluation of available evidence supporting the successful translation of Talimogene laherparepvec (T-VEC). T-VEC is a modified HSV-1 virus

1  
2  
3 produced by *Amgen* and it is the first, and only, FDA approved oncolytic virus therapy; it is  
4 currently approved to treat advanced melanoma.(6) Oncolytic viruses are an emerging cancer  
5 therapy that work by preferentially targeting and infecting cancer cells.(6) Upon infection,  
6 oncolytic viruses can induce an anti-tumor immune response that reduces tumor burden.  
7  
8  
9  
10  
11

12  
13 Through a careful evaluation of T-VEC development we hoped to identify factors that may  
14 contribute to bench-to-bedside success. This may serve an exemplar for other therapies as they  
15 move along the translational continuum. Thus, the purpose of this systematic review was to map  
16 the successful preclinical to clinical trajectory of T-VEC to inform the development paths of future  
17 biotherapeutics.  
18  
19  
20  
21  
22  
23  
24  
25  
26  
27  
28  
29  
30  
31  
32  
33  
34  
35  
36  
37  
38  
39  
40  
41  
42  
43  
44  
45  
46  
47  
48  
49  
50  
51  
52  
53  
54  
55  
56  
57  
58  
59  
60

## METHODS

Our review was registered in full on PROSPERO, the international prospective register of systematic reviews (no. CRD42016043541). The review is reported in accordance to the PRISMA guidelines.(7)

### Eligibility Criteria

We included all clinical and preclinical *in vivo* controlled comparison studies of T-VEC for treatment of any malignancy (randomized, pseudo-randomized, and non-randomized studies), as well as observational studies such as case-control, case-series and case reports. Studies reporting only *ex vivo* or *in vitro* experiments were excluded. For both preclinical and clinical studies, we included studies that administered T-VEC as a monotherapy or in combination with other therapies for treatment of malignancy. We had no exclusions on comparison treatments, which include standard line therapy or no treatment.

### Outcomes

The primary outcome of interest was the efficacy of treatment. Our primary indicator of efficacy was complete response. Other measures of efficacy such as survival, response rates (durable, partial, objective), time to treatment failure, and disease stability were also collected. Such measures were based on the Response Evaluation Criteria in Solid Tumors (RECIST) Guidelines.(8) In preclinical studies, additional measures of efficacy such as changes in mean tumor volume and number of lesions were collected. The primary indicator of efficacy, complete response, was used as the primary outcome regardless of reporting within the individual study, in order to assess the continuity of evidence along the research spectrum. The secondary outcome of

1  
2  
3 interest was safety, for which we collected data on all adverse events in preclinical and clinical  
4  
5 studies.  
6  
7

## 8 **Literature Search**

9

10  
11 In collaboration with a medical information specialist (Risa Shorr, Learning Services, The Ottawa  
12  
13 Hospital) a search strategy was designed to identify all relevant preclinical and clinical studies.  
14  
15 Searches were conducted in the following databases: Embase, Embase Classic, and OvidMedline  
16  
17 from inception until May 2016. This time frame was chosen to ensure all published studies that  
18  
19 contributed T-VECs FDA approval in 2015 were included. Search terms included: Talimogen  
20  
21 laherparepvec, Tvec, OncoVEX and Imlygic. Additional terms pertaining to preclinical studies  
22  
23 (e.g. animal experiment/model) and oncology (e.g. cancer, neoplasm, oncolytic virus) were also  
24  
25 included. Studies were also screened for inclusion based on reference tracking, by scanning the  
26  
27 bibliography of included primary studies and relevant review articles. We did not impose any  
28  
29 restrictions on language or publication type. A grey literature search was not performed. The  
30  
31 finalized search strategy can be found in online supplementary file 1.  
32  
33  
34  
35  
36

## 37 **Study Selection Process**

38

39  
40 Studies identified by our literature search were collated and duplicates were removed. Titles and  
41  
42 abstracts were independently screened for inclusion by two reviewers using DistillerSR (Evidence  
43  
44 Partners, Ottawa, ON). Those deemed potentially relevant were recorded, and full-text articles  
45  
46 were obtained. The same reviewers screened full articles for final eligibility. Disagreements at  
47  
48 any stage were resolved by discussion or by consultation with a senior team member when  
49  
50 necessary. The study selection process was documented using a PRISMA flow diagram (Figure  
51  
52  
53  
54 1).  
55  
56  
57  
58  
59  
60

## Data Extraction

All data extraction was completed independently and in duplicate, using a standardized and piloted data extraction form, with disagreements resolved as mentioned above. Data pertaining to general and intervention characteristics of the included studies were extracted (e.g. study design, country, type of malignancy, dosing of intervention and comparator treatments). For clinical studies, data was collected on patient characteristics (e.g. age, sex, cancer staging, HSV status). For preclinical studies, characteristics on the animal model were extracted (e.g. type of species, cell line used, disease induction method, age, sex, weight).

## Risk of bias – assessment to risk of internal validity

Clinical studies that met inclusion criteria were assessed for risk of bias in duplicate, according to the recommended methodology of the Cochrane Collaboration.<sup>(9)</sup> Five types of biases (selection, performance, detection, attrition, reporting biases) were assessed using six domains: randomization, allocation concealment, blinding of participants/personnel, outcome assessment blinding, incomplete outcome reporting, and selective outcome reporting. Additional domains assessed for risk of bias were: i) reported conflicts of interest, ii.) sample size calculation, and iii.) funding. Each domain was given a score of “high”, “unclear”, or “low” risk of bias for each study. Risk of bias assessment for preclinical studies were assessed using a modified Cochrane Risk of Bias tool and assessed the same domains as indicated for clinical studies.<sup>(10)</sup>

## Assessment of threats to construct validity

Construct validity is the concept in how much a preclinical experiment (i.e. animal studies) corresponds to the clinical entity it is intended to model. There are various threats to construct validity that can be introduced from the preclinical study design. The items evaluated in duplicate



1  
2  
3 for each preclinical study include: i.) use of adult animals, ii.) use of animals with advanced stage  
4 disease (defined as the presence of multiple visceral lesions and/or clinical/histological signs of  
5 malignant progression), iii.) immune status of animals to HSV, iv.) whether a xenograft model was  
6 used, and v.) the use of a humanized immune system model. Each of these items was given a score  
7 of “yes”, “no”, or “unclear” for every preclinical study.  
8  
9  
10  
11  
12  
13

### 14 15 **Statistical Analysis**

16  
17  
18 Efficacy was expressed as proportions with accompanying 95% confidence intervals. If confidence  
19 intervals were not present within the individual study, they were calculated via standard  
20 methods.<sup>(11)</sup> To assess the continuity between preclinical and clinical studies, the efficacy of  
21 studies was plotted as percentage response.  
22  
23  
24  
25  
26  
27

### 28 **Deviations from Protocol**

29  
30  
31 We were unable to assess safety as we could not acquire patient-level safety data. Furthermore,  
32 our primary efficacy outcome stated in protocol was durable response rate. However, this was  
33 changed to complete response as most clinical studies did not report durable response. Subgroup  
34 analyses, meta-analyses, Egger’s test, and pooling of data could not be conducted due to the limited  
35 available data.  
36  
37  
38  
39  
40  
41  
42

### 43 **Patient and Public Involvement**

44  
45  
46 Patients and the public were not involved in this research.  
47  
48

## 49 **RESULTS**

50  
51  
52 Upon removal of duplicates, a total of 8,852 references were identified by the electronic search.  
53  
54 During the review of titles and abstracts, 7,890 references were excluded. Following full text  
55  
56  
57  
58  
59  
60

1  
2  
3 screening, a total of 7 clinical studies,(12-18) and 5 preclinical studies(19-23) were included in  
4  
5 our review (Figure 1).  
6

### 7 ***Characteristics of Included Trials***

8  
9  
10 Characteristics of included studies are shown in Table 1. Preclinical studies were published  
11  
12 between 2003 and 2016 and sample sizes ranged from 20 to 90. Of the 5 preclinical studies, three  
13  
14 used a lymphoma model, one used a colorectal model, and one used a melanoma model. All studies  
15  
16 were performed in mice. The duration of follow-up was reported by two studies and ranged from  
17  
18 10 days to 35 days. The dose of T-VEC used ranged from  $3 \times 10^4$  plaque forming units (PFU) to  
19  
20  $5 \times 10^6$  PFU. One frequency of T-VEC administration varied from, every three days for one week,  
21  
22 every three days for nine days, a single dose given only once, and every other day for five days.  
23  
24 Specific details of study and intervention characteristics for each preclinical study can be found in  
25  
26 online supplementary files 2 and 3.  
27  
28  
29

30  
31 Clinical studies were published between 2006 and 2016 and took place in seven countries. Sample  
32  
33 sizes ranged from 17 to 295. Of the seven clinical studies, four were in melanoma patients, one  
34  
35 was in pancreatic cancer patients, one in head and neck cancer patients and one studied a mix of  
36  
37 breast, colorectal, melanoma and head and neck cancer patients. Six were either Phase I or II, and  
38  
39 one trial was a Phase III evaluation. The primary outcome was efficacy in two studies, safety in  
40  
41 three studies and a combination of efficacy and safety in the other two studies. The duration of  
42  
43 follow-up ranged from six weeks to 44 months.  
44  
45  
46

47  
48 T-VEC was administered alone in four studies, while it was administered adjuvant to  
49  
50 chemotherapy in 3 studies. The dose of T-VEC administered ranged from  $10^4$  PFU/mL to  $10^8$   
51  
52 PFU/mL. In the large, Phase III study, T-VEC was administered at  $\leq 4 \text{ mL} \times 10^6$  PFU/mL once, and  
53  
54 then three weeks later,  $\leq 4 \text{ mL} \times 10^8$  PFU/mL was administered every two weeks for a median of 23  
55  
56  
57  
58  
59  
60

1  
2  
3 weeks. A similar dosing regimen was used in three other trials. The other three trials were dose-  
4 finding in nature and had multiple trial arms receiving increasing doses of T-VEC. In-depth study  
5 details, as well as participant and intervention details for each study can be found in online  
6 supplementary files 4, 5, and 6.  
7  
8  
9  
10  
11  
12

### 13 ***Efficacy of Treatment***

14  
15  
16 Treatment efficacy for each study is summarized in Table 1 and Figure 2. Preclinical studies  
17 reported complete regression rates up to 100% for injected tumors and 80% for contralateral  
18 tumors (see also online supplementary file 7). In comparison, the first published Phase I T-VEC  
19 clinical trial reported a complete response of 0% for cutaneous lesions caused by malignancies of  
20 head and neck, breast, colorectal, and melanoma. Of the multiple malignancies treated, melanoma  
21 had the best response in this trial. Subsequent Phase I/II melanoma trials were then conducted and  
22 demonstrated complete response rates of 20-22%. This was followed by the Phase III OPTIM  
23 melanoma trial, which had a complete response rate of 10.8%. Studies involving non-melanoma  
24 cancers varied with efficacies between 0-24%  
25  
26  
27  
28  
29  
30  
31  
32  
33  
34  
35  
36

### 37 ***Safety of treatment***

38  
39  
40 We attempted to assess safety across clinical studies, however we were unable to obtain patient  
41 level data from any of the studies. The definitions of adverse events, and the manner in which they  
42 were classified, was found to be highly heterogenous across studies. Studies did not specify what  
43 percent of adverse events were repeated adverse events from the same patient(s), used different  
44 criteria for recording and reporting adverse events, categorized them differently, etc. Therefore,  
45 we were unable to pool adverse events or interpret findings reliably.  
46  
47  
48  
49  
50  
51  
52  
53  
54  
55  
56  
57  
58  
59  
60

### Validity Assessments

Construct validity, the concept of how well an animal model represents the clinical entity it is intended to mimic, was first assessed through the following domains: the use of appropriately-aged mice, advanced stage of disease, HSV-immunity, and types of mouse models. None of the preclinical studies fully reported or used methodologies to reduce threats to construct validity domains (Table 2). No studies declared using adult animal models, no studies used animals with late stage disease, only one study used animals immune to HSV, no studies used a xenograft model, and no studies reported using an animal model with a humanized immune system.

We also assessed internal validity (i.e. risk of bias) and found that all preclinical studies had high or unclear risk of bias across the assessed domains: randomization sequence, allocation concealment, blinding, incomplete reporting, sample size calculation, and funding source (Table 3). For clinical studies, early phase trials had high or unclear risk of bias across at least six of nine domains whereas the more robust Phase III OPTIM trial had the lowest risk of bias and also the lowest efficacy of any of the published melanoma clinical trials (Table 4). Reporting of key methodological elements was lacking.

### DISCUSSION

We hoped to synthesize the evidence to produce a clear road map of T-VEC's translation in the published literature to follow the journey of a successful biotherapeutic. Yet, we were unable to paint a clear picture of how the evidence was utilized in proceeding to melanoma clinical trials. Rather, our assessment uncovered a disconnect between *in vivo* preclinical and clinical findings. Furthermore, the road map was plagued with poor reporting, high risk of bias, and insufficient data along the translational path. Overall, we were surprised by the pace and magnitude of diminishing

1  
2  
3 efficacy as T-VEC moved from bench to bedside and then towards later phase clinical trials (i.e.  
4 Phase I to III). Although T-VEC was successful in terms of gaining regulatory approval, its  
5 translational path is complicated, and the pieces of the evidence puzzle do not easily fit together.  
6  
7 While we appreciate that translation is not a predictable linear process, it is difficult to learn from  
8 the example of T-VEC given the available and reported pre-clinical and clinical evidence.  
9  
10  
11  
12  
13

14  
15 While many novel therapeutics are under intellectual property rights, details of study design and  
16 results should be transparently reported for scientists, clinicians, and patients to evaluate findings.  
17  
18 The fact that the only FDA approved oncolytic virus therapy is not clearly reported illustrates the  
19 issues plaguing the success of cancer therapeutics. Nonetheless, T-VEC has shown some efficacy  
20 in treating refractory melanoma and numerous clinical trials are underway to assess its use in  
21 combination with other cancer regimens and in treating other malignancies.  
22  
23  
24  
25  
26  
27  
28  
29

30 Perhaps the largest discrepancy noted was that only a single preclinical study used a melanoma  
31 model, whereas all but two clinical studies administered T-VEC to melanoma patients. Conversely,  
32 lymphoma, which was used in three preclinical studies, was not assessed in clinical studies.  
33  
34 Interestingly, our subsequent searches found that Amgen's FDA filing (STN# 125518.000) (24)  
35 for T-VEC did not appear to report on any *in vivo* melanoma models, whereas the EMA report did  
36 (EMA/734400/2015).(25) Thus, the majority of animal models were off-target from the  
37 malignancies studied in clinical trials and may have poorly represented melanoma in the clinical  
38 setting. Coupled with these findings was the fact that the majority of our studies were found to be  
39 at a high risk of bias. Such threats to internal validity can bias results and may help explain T-  
40 VEC's superior preclinical efficacy compared to later phase clinical trials. A lack of randomization  
41 and blinding in preclinical studies has been associated with inflated effect sizes,(26, 27) thus this  
42 may partially explain the preclinical to clinical discrepancy of T-VEC.  
43  
44  
45  
46  
47  
48  
49  
50  
51  
52  
53  
54  
55  
56  
57  
58  
59  
60

1  
2  
3 Reporting of methods and findings was incomplete in most of the studies included. Only one full  
4 preclinical article on T-VEC was published, and solely aggregate patient data for later phase trials  
5 was available. Poor reporting and study design are major contributors to the ongoing  
6 reproducibility crisis in preclinical research.(28) Thus, in hopes of presenting a clearer picture of  
7 T-VEC's successful translation, we contacted *Amgen* to obtain preclinical *in vivo* melanoma data,  
8 patient-level safety data, and any additional efficacy data. Patient-level data would afford the  
9 ability to combine data across T-VEC's clinical development and also provide clarification into  
10 the categorization of adverse events. Recently, release of individual patient data to third parties  
11 has been advocated by the Institute of Medicine, journal editors, and others as it enhances  
12 transparency, enables re-analyses of data, and helps address reproducibility.(29) The reporting of  
13 harms in clinical trials remains an issue in the scientific community,(30-32) and represents a  
14 roadblock to translational success. Some basic steps required to improve the reporting of safety in  
15 translational research include the development of standardized scales and instruments, instituting  
16 active rather than passive surveillance for toxicity, including detailed information on participant  
17 withdrawals due to toxicity, reporting the timing, frequency, and duration of clinically relevant  
18 events, and the publication of raw data.(33, 34) *Amgen*, however, was unwilling to enter a data  
19 sharing agreement, as they stated that there was little value to compel a transparent data release  
20 for our proposed analyses. This lack of transparency and incomplete reporting is disappointing,  
21 especially considering that it was *Amgen* that previously highlighted poor reporting as contributing  
22 to its own failure to reproduce 47 of 53 high-impact preclinical cancer studies.(35) Their findings  
23 fuelled a call by the NIH and other stakeholders to enhance the reproducibility and transparency  
24 of preclinical research.(36)

1  
2  
3 As stated, we recognize that translation is not a linear process, but we should observe consistent  
4 and coherent patterns. Moving forward, we suggest that preclinical and clinical studies for  
5 emerging therapies should be fully reported and attention should be given to validities in order to  
6 develop more precise estimates of effect early in development. Investigators should carefully  
7 match their preclinical model to the intended clinical population; when possible, both disease states  
8 and outcomes measured should have high construct validity. Following successful exploratory  
9 preclinical studies, investigators should consider preclinical systematic reviews(37) and designing  
10 methodologically rigorous confirmatory and/or multicenter preclinical studies.(38) These steps  
11 may allow preclinical testing to more accurately forecast downstream clinical results in human  
12 patients.(27) Within the trajectory of clinical development (i.e. once clinical trials have been  
13 initiated), careful consideration of methods to reduce bias should also be considered (although,  
14 this may not be possible for the earliest phase trials). We believe these steps will provide unbiased  
15 and valuable information that will ultimately provide patients with cancer therapies that match  
16 their preclinical and early clinical promise.  
17  
18  
19  
20  
21  
22  
23  
24  
25  
26  
27  
28  
29  
30  
31  
32  
33  
34  
35  
36  
37  
38

## 39 CONCLUSIONS

40  
41  
42 The findings from our systematic review demonstrate that even successful biotherapeutics may  
43 not demonstrate a clear translational road map. The magnitude of efficacy of T-VEC demonstrated  
44 in preclinical studies was considerably larger when T-VEC was moved to the clinic, and the most  
45 methodologically rigorous trial included in our review demonstrated the smallest degree of  
46 efficacy. Methodologically rigorous studies should be performed earlier on in the translational  
47 pathway, which may help to get a realistic estimate of treatment efficacy prior to clinical  
48 translation.  
49  
50  
51  
52  
53  
54  
55  
56  
57  
58  
59  
60

## DECLARATIONS

*Ethics approval:* Not applicable.

*Consent for publication:* Not applicable.

*Availability of data:* The datasets used and/or analysed during the current study are available from the corresponding author on reasonable request.

*Competing interests:* The authors declare that they have no competing interests.

*Funding:* Biotherapeutics for Cancer Treatment (BioCanRx) supported the conduct of this study by a Catalyst grant. BioCanRx is a Government of Canada funded Networks of Centres of Excellence and was not involved in any other aspect of the project, such as the design of the project's protocol and analysis plan, the collection of data and analyses. CB was also supported by a BioCanRx studentship. ML is supported by The Ottawa Hospital Anesthesia Alternate Funds Association and the Scholarship Protected Time Program, Department of Anesthesiology and Pain Medicine, uOttawa.

*Author contributions:* MML and DAF conceptualized the study. MML, RA, DAF, and GJL contributed to the study design. GJL, YYD, and CB conducted data extraction. All authors analysed and interpreted the data. MML and GJL were responsible for drafting the manuscript. All authors critically reviewed the manuscript and provided intellectual content. All authors approve the final version of the manuscript.

*Acknowledgments:* We thank Risa Shorr (Ottawa Hospital Research Institute librarian) for systematic search assistance. MML is supported by The Ottawa Hospital Anesthesia Alternate Funds Association and the Scholarship Protected Time Program, Department of Anesthesiology and Pain Medicine, uOttawa.



## REFERENCES

1. Freedman LP, Cockburn IM, Simcoe TS. The Economics of Reproducibility in Preclinical Research. *PLoS Biol.* 2015;13(6):e1002165.
2. Contopoulos-Ioannidis DG, Ntzani E, Ioannidis JP. Translation of highly promising basic science research into clinical applications. *Am J Med.* 2003;114(6):477-84.
3. Morris ZS, Wooding S, Grant J. The answer is 17 years, what is the question: understanding time lags in translational research. *J R Soc Med.* 2011;104(12):510-20.
4. Use of Laboratory Animals in Biomedical and Behavioral Research. Washington (DC)1988.
5. Umscheid CA, Margolis DJ, Grossman CE. Key concepts of clinical trials: a narrative review. *Postgrad Med.* 2011;123(5):194-204.
6. Rehman H, Silk AW, Kane MP, Kaufman HL. Into the clinic: Talimogene laherparepvec (T-VEC), a first-in-class intratumoral oncolytic viral therapy. *J Immunother Cancer.* 2016;4:53.
7. Moher D, Liberati A, Tetzlaff J, Altman DG, Group P. Preferred reporting items for systematic reviews and meta-analyses: the PRISMA statement. *J Clin Epidemiol.* 2009;62(10):1006-12.
8. Eisenhauer EA, Therasse P, Bogaerts J, Schwartz LH, Sargent D, Ford R, et al. New response evaluation criteria in solid tumours: revised RECIST guideline (version 1.1). *Eur J Cancer.* 2009;45(2):228-47.
9. Higgins JP, Altman DG, Gotzsche PC, Juni P, Moher D, Oxman AD, et al. The Cochrane Collaboration's tool for assessing risk of bias in randomised trials. *BMJ.* 2011;343:d5928.
10. Hooijmans CR, Rovers MM, de Vries RBM, Leenaars M, Ritskes-Hoitinga M, Langendam MW. SYRCLE's risk of bias tool for animal studies. *BMC Medical Research Methodology.* 2014;14(1):43.
11. Newcombe RG. Two-sided confidence intervals for the single proportion: comparison of seven methods. *Statistics in medicine.* 1998;17(8):857-72.
12. Hu JC, Coffin RS, Davis CJ, Graham NJ, Groves N, Guest PJ, et al. A phase I study of OncoVEXGM-CSF, a second-generation oncolytic herpes simplex virus expressing granulocyte macrophage colony-stimulating factor. *Clinical cancer research : an official journal of the American Association for Cancer Research.* 2006;12(22):6737-47.
13. Senzer NN, Kaufman HL, Amatruda T, Nemunaitis M, Reid T, Daniels G, et al. Phase II clinical trial of a granulocyte-macrophage colony-stimulating factor-encoding, second-generation oncolytic herpesvirus in patients with unresectable metastatic melanoma. *J Clin Oncol.* 2009;27(34):5763-71.
14. Andtbacka RHI, Kaufman HL, Collichio F, Amatruda T, Senzer N, Chesney J, et al. Talimogene Laherparepvec Improves Durable Response Rate in Patients With Advanced Melanoma. *Journal of Clinical Oncology.* 2015;33(25):2780-8.
15. Long GV, Dummer R, Ribas A, Puzanov I, Michielin O, Vanderwalde A, et al. 24LBA Safety data from the phase 1b part of the MASTERKEY-265 study combining talimogene laherparepvec (T-VEC) and pembrolizumab for unresectable stage IIIB-IV melanoma. *European Journal of Cancer.* 2015;51:S722.
16. Puzanov I, Milhem MM, Minor D, Hamid O, Li A, Chen L, et al. Talimogene Laherparepvec in Combination With Ipilimumab in Previously Untreated, Unresectable Stage IIIB-IV Melanoma. *J Clin Oncol.* 2016;34(22):2619-26.

17. Harrington KJ, Hingorani M, Tanay MA, Hickey J, Bhide SA, Clarke PM, et al. Phase I/II study of oncolytic HSV GM-CSF in combination with radiotherapy and cisplatin in untreated stage III/IV squamous cell cancer of the head and neck. *Clinical cancer research : an official journal of the American Association for Cancer Research*. 2010;16(15):4005-15.
18. Chang KJ, Senzer NN, Binmoeller K, Goldsweig H, Coffin R. Phase I dose-escalation study of talimogene laherparepvec (T-VEC) for advanced pancreatic cancer (ca). *Journal of Clinical Oncology*. 2012;30(15\_suppl):e14546-e.
19. Liu BL, Robinson M, Han ZQ, Branston RH, English C, Reay P, et al. ICP34.5 deleted herpes simplex virus with enhanced oncolytic, immune stimulating, and anti-tumour properties. *Gene Ther*. 2003;10(4):292-303.
20. Piasecki J, Tiep L, Zhou J, Beers C. Talimogene laherparepvec generates systemic T-cell-mediated anti-tumor immunity. *Journal for ImmunoTherapy of Cancer*. 2013;1(1):P198.
21. Cooke K, Rottman J, Zhan J, Mitchell P, Ikotun O, Yerby B, et al. Oncovex MGM-CSF –mediated regression of contralateral (non-injected) tumors in the A20 murine lymphoma model does not involve direct viral oncolysis. *Journal for Immunotherapy of Cancer*. 2015;3(Suppl 2):P336-P.
22. Piasecki J, le T, Ponce R, Beers C. Abstract 258: Talimogene laherparepvec increases the anti-tumor efficacy of the anti-PD-1 immune checkpoint blockade. *Cancer Research*. 2015;75(15 Supplement):258-.
23. Cooke K, Estrada J, Zhan J, Mitchell P, Bulliard Y, Beltran PJ. Abstract 2351: Development of a B16F10 cell line expressing mNectin1 to study the activity of OncoVEXmGM-CSF in murine syngeneic melanoma models. *Cancer Research*. 2016;76(14 Supplement):2351-.
24. US Food and Drug Administration. IMLYGIC (talimogene laherparepvec) 2015 [Available from: <https://www.fda.gov/vaccines-blood-biologics/cellular-gene-therapy-products/imlygic-talimogene-laherparepvec>].
25. European Medicines Agency. Assessment report Imlygic International non-proprietary name: talimogene laherparepvec 2015 [Available from: [https://www.ema.europa.eu/en/documents/assessment-report/imlygic-epar-public-assessment-report\\_en.pdf](https://www.ema.europa.eu/en/documents/assessment-report/imlygic-epar-public-assessment-report_en.pdf)].
26. Hirst JA, Howick J, Aronson JK, Roberts N, Perera R, Koshiaris C, et al. The need for randomization in animal trials: an overview of systematic reviews. *PLoS One*. 2014;9(6):e98856.
27. Macleod MR, van der Worp HB, Sena ES, Howells DW, Dirnagl U, Donnan GA. Evidence for the efficacy of NXY-059 in experimental focal cerebral ischaemia is confounded by study quality. *Stroke*. 2008;39(10):2824-9.
28. Landis SC, Amara SG, Asadullah K, Austin CP, Blumenstein R, Bradley EW, et al. A call for transparent reporting to optimize the predictive value of preclinical research. *Nature*. 2012;490(7419):187-91.
29. Zarin DA, Tse T. Sharing Individual Participant Data (IPD) within the Context of the Trial Reporting System (TRS). *PLoS Med*. 2016;13(1):e1001946.
30. Hodkinson A, Kirkham JJ, Tudur-Smith C, Gamble C. Reporting of harms data in RCTs: a systematic review of empirical assessments against the CONSORT harms extension. *BMJ Open*. 2013;3(9):e003436.
31. Rodgers MA, Brown JV, Heirs MK, Higgins JP, Mannion RJ, Simmonds MC, et al. Reporting of industry funded study outcome data: comparison of confidential and published data on the safety and effectiveness of rhBMP-2 for spinal fusion. *BMJ*. 2013;346:f3981.

- 1
- 2
- 3 32. Jureidini JN, McHenry LB, Mansfield PR. Clinical trials and drug promotion: selective reporting of
- 4 study 329. *International Journal of Risk & Safety in Medicine*. 2008;20(1-2):73-81.
- 5
- 6 33. Ioannidis JP, Lau J. Improving safety reporting from randomised trials. *Drug Saf*. 2002;25(2):77-84.
- 7
- 8 34. Lineberry N, Berlin JA, Mansi B, Glasser S, Berkwits M, Klem C, et al. Recommendations to
- 9 improve adverse event reporting in clinical trial publications: a joint pharmaceutical industry/journal
- 10 editor perspective. *BMJ*. 2016;355:i5078.
- 11
- 12 35. Begley CG, Ellis LM. Drug development: Raise standards for preclinical cancer research. *Nature*.
- 13 2012;483(7391):531-3.
- 14
- 15 36. Collins FS, Tabak LA. Policy: NIH plans to enhance reproducibility. *Nature*. 2014;505(7485):612-3.
- 16
- 17 37. Lalu MM, Sullivan KJ, Mei SH, Moher D, Straus A, Fergusson DA, et al. Evaluating mesenchymal
- 18 stem cell therapy for sepsis with preclinical meta-analyses prior to initiating a first-in-human trial.
- 19 *Elife*. 2016;5.
- 20
- 21 38. Llovera G, Hofmann K, Roth S, Salas-Perdomo A, Ferrer-Ferrer M, Perego C, et al. Results of a
- 22 preclinical randomized controlled multicenter trial (pRCT): Anti-CD49d treatment for acute brain
- 23 ischemia. *Science translational medicine*. 2015;7(299):299ra121.
- 24
- 25
- 26
- 27
- 28
- 29
- 30
- 31
- 32
- 33
- 34
- 35
- 36
- 37
- 38
- 39
- 40
- 41
- 42
- 43
- 44
- 45
- 46
- 47
- 48
- 49
- 50
- 51
- 52
- 53
- 54
- 55
- 56
- 57
- 58
- 59
- 60

## Figure Legends

### Figure 1. Study selection flow diagram

**Figure 2. Preclinical and clinical efficacy of T-VEC.** Four preclinical studies using mice demonstrated efficacy rates of 20-100% and clinical studies (3 melanoma and 2 mixed malignancy studies) demonstrated efficacy rates from 0-23.5%. Non-melanoma/mixed studies are represented by blue bars whereas melanoma studies are represented by orange bars. Where possible, complete regression rates of contralateral tumors for mice were used in preclinical studies and complete response was used for clinical studies. Efficacy rates decrease in the preclinical to clinical translation and upon more rigorous study design in later phase clinical trials. If possible, error bars are plotted and represent 95% confidence intervals. Some studies were not included in this analysis due to no reporting of outcome for CR.

**Table 1A.** Study characteristics of included preclinical studies of T-VEC.

| Preclinical Study            | Treatment                         | Total Number of Animals Used | Type of Cancer/Model                           | Efficacy Measures*                                                                         | Risk of Bias (9**) |
|------------------------------|-----------------------------------|------------------------------|------------------------------------------------|--------------------------------------------------------------------------------------------|--------------------|
| Liu, 2003 <sup>14</sup>      | T-VEC; HSV1 wildtype immunization | 90                           | Lymphoma (A20 murine lymphoma mouse model)     | CR: 100% (n=10) (injected)                                                                 | 9                  |
| Piasecki, 2013 <sup>15</sup> | T-VEC                             | NR                           | Lymphoma (A20 murine lymphoma mouse model)     | CR: 70-100% of injected, 50-60% of contralateral                                           | 9                  |
| Piasecki, 2015 <sup>17</sup> | T-VEC + Anti-PD-1                 | NR                           | Colorectal (MC-38 colon carcinoma mouse model) | CR: 80.0% (44.2-96.5%) (injected)<br>n=10<br>CR: 20.0% (3.5-55.8%) (contralateral)<br>n=10 | 9                  |
| Cooke, 2015 <sup>16</sup>    | T-VEC                             | 40                           | Lymphoma (A20 murine lymphoma mouse model)     | CR: 100% (65.5-100%) (injected)<br>n=10<br>CR: 50% (23.7-76.3%) (contralateral)            | 9                  |
| Cooke, 2016 <sup>18</sup>    | T-VEC                             | 20                           | Melanoma (B16F10 melanoma model)               | NR – statistically significant tumor reduction and survival noted.                         | 9                  |

**Table 2B.** Study characteristics of included clinical studies of T-VEC.

| Clinical Study                                              | Treatment             | Total N         | Type of Cancer                              | Efficacy Measures*                                                                                  | Risk of Bias (/9**) |
|-------------------------------------------------------------|-----------------------|-----------------|---------------------------------------------|-----------------------------------------------------------------------------------------------------|---------------------|
| Hu, 2006 <sup>7</sup><br><i>Non-controlled Phase I</i>      | T-VEC                 | 30 (9 melanoma) | Breast, colorectal, melanoma, head and neck | CR: 0% (0-14.1%)<br>PR: 0% (0-14.1%)                                                                | 7                   |
| Senzer, 2009 <sup>8</sup><br><i>Non-controlled Phase II</i> | T-VEC                 | 50              | Melanoma                                    | OR: 26.0% (15.1-40.6%)<br>CR: 20.0% (10.5-34.1%)<br>PR: 10.0% (3.7-22.6%)                           | 7                   |
| Harrington, 2010 <sup>12</sup><br><i>Phase I/II</i>         | T-VEC + cisplatin     | 17              | Head and neck                               | CR: 23.5% (7.8-50.2%)<br>PR: 58.8% (33.5-80.6%)<br>OR: 82.4% (55.8-95.3%)                           | 6                   |
| Chang, 2012 <sup>13</sup><br><i>Phase I</i>                 | T-VEC                 | 17              | Pancreatic                                  | OR: 0% (0-22.9%)                                                                                    | 6                   |
| Andtbacka, 2015 <sup>9</sup><br><i>Phase III</i>            | T-VEC                 | 295             | Melanoma                                    | DR: 16.3% (12.1-20.5%)<br>OR: 26.4% (21.4-31.5%)<br>PR: 15.6% (11.7-20.3%)<br>CR: 10.8% (7.6-15.1%) | 3                   |
|                                                             | GM-CSF (control)      | 141             |                                             | DR: 2.1% (0-4.5%)<br>OR: 5.7% (1.9-9.5%)<br>PR: 5.0% (1.3-8.5%)<br>CR: < 1%                         |                     |
| Long, 2015 <sup>10</sup><br><i>Phase Ib</i>                 | T-VEC + pembrolizumab | 21              | Melanoma                                    | -                                                                                                   | 6                   |
| Puzanov, 2016 <sup>11</sup><br><i>Phase Ib</i>              | T-VEC + IPI           | 18              | Melanoma                                    | DR: 44.4% (22.4-68.7%)<br>OR: 50.0% (29.0-70.9%)<br>CR: 22.2% (7.4-48.1%)<br>PR: 27.8% (10.7-53.6%) | 6                   |

\* DR – durable response; OR – objective response; CR – complete response/complete regression; PR – partial response; DR/OR/CR/PR definitions were based on RECIST guidelines for clinical studies. \*\*Total number of domains that were assessed a score of high risk or unclear (maximum = 9). The nine domains include randomization, allocation concealment, blinding of participants/personnel, outcome assessment blinding, incomplete outcome reporting, selective outcome reporting, reported conflicts of interest, sample size calculation, funding.

1  
2  
3  
4  
5  
6  
7  
8  
9  
10  
11  
12  
13  
14  
15  
16  
17  
18  
19  
20  
21  
22  
23  
24  
25  
26  
27  
28  
29  
30  
31  
32  
33  
34  
35  
36  
37  
38  
39  
40  
41  
42  
43  
44  
45  
46  
47

**Table 3.** Construct validity assessment for preclinical studies

| <b>Author, Year</b> | <b>Adult Used</b> | <b>Animals with Advanced Stage Disease</b> | <b>Animals Immune to HSV</b> | <b>Xenograft Model Used</b> | <b>Used Model with a Humanized Immune System</b> |
|---------------------|-------------------|--------------------------------------------|------------------------------|-----------------------------|--------------------------------------------------|
| Cooke, 2016         | Unclear           | No                                         | Unclear                      | No                          | Unclear                                          |
| Cooke, 2015         | Unclear           | No                                         | Unclear                      | No                          | Unclear                                          |
| Piasecki, 2015      | Unclear           | Unclear                                    | Unclear                      | No                          | Unclear                                          |
| Piasecki, 2013      | Unclear           | Unclear                                    | Unclear                      | No                          | Unclear                                          |
| Liu, 2003           | Unclear           | No                                         | Yes                          | No                          | Unclear                                          |

er review only

**Table 4.** Risk of bias assessment for preclinical studies

| <b>Author,<br/>Year</b> | <b>Random<br/>Sequence<br/>Generation</b> | <b>Allocation<br/>Concealment</b> | <b>Blinding of<br/>Personnel</b> | <b>Blinded<br/>Outcome<br/>Assessment</b> | <b>Incomplete<br/>Outcomes<br/>Addressed</b> | <b>Selective<br/>Outcome<br/>Reporting</b> | <b>Conflicts<br/>of Interest</b> | <b>A Priori<br/>Sample<br/>Size<br/>Calculation</b> | <b>Funding</b> |
|-------------------------|-------------------------------------------|-----------------------------------|----------------------------------|-------------------------------------------|----------------------------------------------|--------------------------------------------|----------------------------------|-----------------------------------------------------|----------------|
| Cooke,<br>2016          | High Risk                                 | High Risk                         | Unclear                          | Unclear                                   | High Risk                                    | High Risk                                  | Unclear                          | Unclear                                             | High Risk      |
| Cooke,<br>2015          | High Risk                                 | High Risk                         | Unclear                          | Unclear                                   | High Risk                                    | High Risk                                  | Unclear                          | Unclear                                             | High Risk      |
| Piasecki,<br>2015       | Unclear                                   | Unclear                           | Unclear                          | Unclear                                   | High Risk                                    | High Risk                                  | Unclear                          | Unclear                                             | High Risk      |
| Piasecki,<br>2013       | Unclear                                   | Unclear                           | Unclear                          | Unclear                                   | High Risk                                    | High Risk                                  | Unclear                          | Unclear                                             | High Risk      |
| Liu, 2003               | Unclear                                   | Unclear                           | Unclear                          | Unclear                                   | High Risk                                    | Unclear                                    | Unclear                          | Unclear                                             | High Risk      |



1  
2  
3  
4  
5  
6  
7  
8  
9  
10  
11  
12  
13  
14  
15  
16  
17  
18  
19  
20  
21  
22  
23  
24  
25  
26  
27  
28  
29  
30  
31  
32  
33  
34  
35  
36  
37  
38  
39  
40  
41  
42  
43  
44  
45  
46  
47

**Table 5.** Risk of bias assessment for clinical studies

| <b>Author, Year</b> | <b>Random Sequence Generation</b> | <b>Allocation Concealment</b> | <b>Blinding of Participants and Personnel</b> | <b>Blinding of Outcome Assessors</b> | <b>Incomplete Outcome Data Addressed</b> | <b>Selective Reporting</b> | <b>Conflicts of Interest</b> | <b>Funding</b> | <b>Sample Size Calculation</b> |
|---------------------|-----------------------------------|-------------------------------|-----------------------------------------------|--------------------------------------|------------------------------------------|----------------------------|------------------------------|----------------|--------------------------------|
| Andtbacka, 2015     | Low Risk                          | Low Risk                      | High Risk                                     | Low Risk                             | Low Risk                                 | Low Risk                   | High Risk                    | High Risk      | Low Risk                       |
| Long, 2015          | High Risk                         | N/A                           | High Risk                                     | Unclear                              | Low Risk                                 | Low Risk                   | High Risk                    | High Risk      | Unclear                        |
| Puzanov, 2016       | High Risk                         | N/A                           | High Risk                                     | Unclear                              | Low Risk                                 | Low Risk                   | High Risk                    | High Risk      | Unclear                        |
| Chang, 2012         | High Risk                         | N/A                           | High Risk                                     | Unclear                              | Low Risk                                 | Low Risk                   | High Risk                    | High Risk      | Unclear                        |
| Harrington, 2010    | High Risk                         | N/A                           | Unclear                                       | High Risk                            | Low Risk                                 | Low Risk                   | High Risk                    | High Risk      | Unclear                        |
| Senzer, 2009        | High Risk                         | N/A                           | High Risk                                     | Unclear                              | Low Risk                                 | High Risk                  | High Risk                    | High Risk      | Unclear                        |
| Hu, 2006            | High Risk                         | N/A                           | Unclear                                       | Unclear                              | Low Risk                                 | Unclear                    | High Risk                    | High Risk      | Unclear                        |

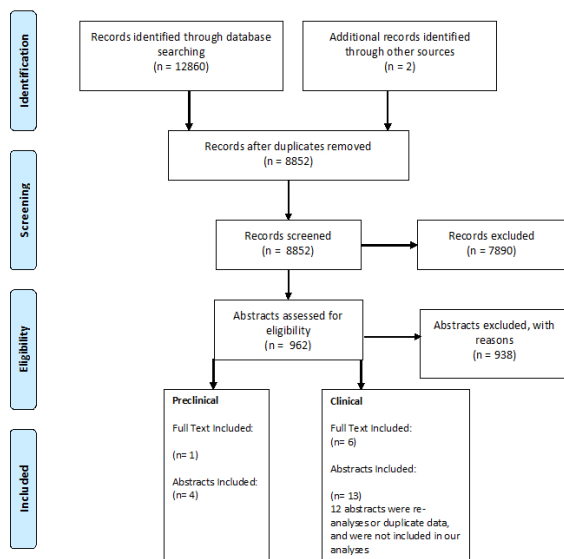

Figure 1. Study selection flow diagram

304x209mm (96 x 96 DPI)



Figure 2. Preclinical and clinical efficacy of T-VEC. Four preclinical studies using mice demonstrated efficacy rates of 20-100% and clinical studies (3 melanoma and 2 mixed malignancy studies) demonstrated efficacy rates from 0-23.5%. Non-melanoma/mixed studies are represented by blue bars whereas melanoma studies are represented by orange bars. Where possible, complete regression rates of contralateral tumors for mice were used in preclinical studies and complete response was used for clinical studies. Efficacy rates decrease in the preclinical to clinical translation and upon more rigorous study design in later phase clinical trials. If possible, error bars are plotted and represent 95% confidence intervals. Some studies were not included in this analysis due to no reporting of outcome for CR.

304x209mm (96 x 96 DPI)

### Online Supplementary File 1: Search Strategy

Database: Ovid MEDLINE(R) In-Process & Other Non-Indexed Citations and Ovid MEDLINE(R) <1946 to Present>

Search Strategy:

-----

- 1 Talimogen\* laherparepvec.mp. (28)
- 2 t vec.mp. (24)
- 3 OncoVEX\*.mp. (15)
- 4 Imlygic.mp. (2)
- 5 JS1 34\*.tw. (5)
- 6 or/1-5 (51)
- 7 Oncolytic Virotherapy/ or Oncolytic Viruses/ or cancer vaccines/tu (7016)
- 8 (cancer adj2 (vaccine\* or virus\* or virotherap\* or viral therap\*).tw. (5206)
- 9 exp neoplasms/ or cancer.tw. (3097511)
- 10 or/7-9 (3097684)
- 11 simplexvirus/ or herpesvirus 1, human/ or Herpes Simplex/ (32955)
- 12 (hsv1 or hsv or herpesvirus or Herpes).tw. (72684)
- 13 11 or 12 (77360)
- 14 10 and 13 (12929)
- 15 ((oncolyt\* or cancer or tumor or tumour) adj3 (hsv1 or hsv or hsv or herpesvirus or Herpes)).tw. (846)
- 16 (oncolyt\* adj3 (virotherap\* or virus\* or viral therap\*).tw. (2183)
- 17 or/14-16 (14671)
- 18 exp animal experimentation/ or exp models, animal/ or animals/ or mammals/ or vertebrates/ or exp fishes/ or exp amphibia/ or exp reptiles/ or exp birds/ or exp hyraxes/ or exp marsupialia/ or exp monotremata/ or exp scandentia/ or exp chiroptera/ or exp carnivora/ or exp cetacea/ or exp Xenarthra/ or exp elephants/ or exp insectivora/ or exp lagomorpha/ or exp rodentia/ or exp sirenia/ or exp Perissodactyla/ or primates/ or exp strepsirhini/ or haplorhini/ or exp tarsii/ or exp platyrrhini/ or catarrhini/ or exp cercopithecidae/ or gorilla gorilla/ or pan paniscus/ or pan troglodytes/ or exp pongo/ or exp hylobatidae/ or hominidae/ (5893175)
- 19 (animal\$1 or chordata or vertebrate\* or fish\$2 or amphibian\* or amphibium\* or reptile\$1 or bird\$1 or mammal\* or dog or dogs or canine\$1 or cat or cats or hyrax\* or marsupial\* or monotrem\* or scandentia or bat or bats or carnivor\* or cetacea or edentata\* or elephant\* or insect or insects or insectivore or lagomorph\* or rodent\$2 or mouse or mice or murine or murinae or muridae or rat or rats or pig or pigs or piglet\$1 or swine or rabbit\$1 or sheep\$1 or goat\$1 or horse\$1 or equus or cow or cows or cattle or calf or calves or bovine or sirenia or ungulate\$1 or primate\$1 or prosimian\* or haplorhini\* or tarsiiiform\* or simian\* or platyrrhini or catarrhini or cercopithecidae or ape or apes or hylobatidae or hominid\* or chimpanzee\* or gorilla\* or orangutan\* or monkey or monkeys or ape or apes).tw. (4149175)
- 20 (preclinic\$ or pre clinic\$).tw. (72274)
- 21 or/18-20 (6474971)
- 22 17 and 21 (6511)
- 23 6 or 22 (6545)

Online Supplementary File 2. Preclinical Study Characteristics

| Author, Year   | Year Study Conducted | Country | Study Design                   | Species | Strain  | Model                             | Type of Cancer | Baseline Tumor Size | Gender | Mean Age | Mean Weight | Co-Interventions            | Duration of Follow Up |
|----------------|----------------------|---------|--------------------------------|---------|---------|-----------------------------------|----------------|---------------------|--------|----------|-------------|-----------------------------|-----------------------|
| Cooke, 2015    | ---                  | USA     | Interventional; Non-Controlled | Mouse   | Balb/c  | A20 Murine Lymphoma               | Lymphoma       | 150 mm <sup>3</sup> | Female | ---      | ---         | N/A                         | ---                   |
| Piasecki, 2015 | ---                  | ---     | Controlled Comparison          | Mouse   | C57Bl/6 | Syngeneic MC-38 Colon Carcinoma   | Colon Cancer   | ---                 | ---    | ---      | ---         | Anti-PD-1                   | ---                   |
| Piasecki, 2013 | ---                  | ---     | Controlled Comparison          | Mouse   | ---     | A20 Syngeneic Contralateral Model | Lymphoma       | ---                 | ---    | ---      | ---         | N/A                         | 10 days               |
| Liu, 2003      | 2002                 | UK      | Controlled Comparison          | Mouse   | Balb/c  | Syngeneic A20 Lymphoma            | Lymphoma       | 0.5 cm diameter     | ---    | ---      | ---         | Immunization wild type HSV1 | 35 days               |

---: not reported  
N/A: not applicable  
Cooke, 2016 did not provide any relevant information

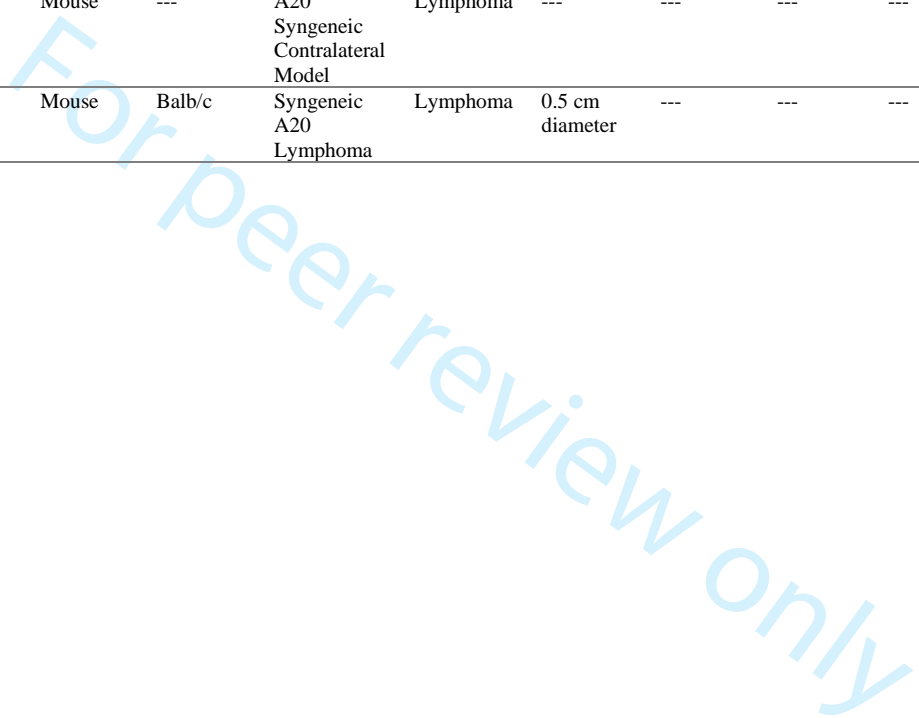

1  
2  
3  
4  
5  
6  
7  
8  
9  
10  
11  
12  
13  
14  
15  
16  
17  
18  
19  
20  
21  
22  
23  
24  
25  
26  
27  
28  
29  
30  
31  
32  
33  
34  
35  
36  
37  
38  
39  
40  
41  
42  
43  
44  
45  
46  
47

Online Supplementary File 3. Preclinical Intervention and Comparator Characteristics

| Author, Year   | Experiment | Group                           | N   | Dose 1                        | Frequency Dose 1 | Duration Dose 1               | Dose 2          | Frequency Dose 2 | Duration Dose 2 | Dose 3 | Frequency Dose 3 | Duration Dose 3 |
|----------------|------------|---------------------------------|-----|-------------------------------|------------------|-------------------------------|-----------------|------------------|-----------------|--------|------------------|-----------------|
| Cooke, 2015    | 1          | Cohort 1: TVEC                  | 10  | 3x10 <sup>4</sup> PFU         | ---              | ---                           | N/A             | N/A              | N/A             | N/A    | N/A              | N/A             |
|                |            | Cohort 2:                       | 10  | ---                           | ---              | ---                           | N/A             | N/A              | N/A             | N/A    | N/A              | N/A             |
|                |            | Cohort 3: TVEC                  | 10  | 3x10 <sup>6</sup> PFU         | Every 3 days     | 1 week                        | N/A             | N/A              | N/A             | N/A    | N/A              | N/A             |
|                |            | Cohort 4:                       | 10  | ---                           | ---              | ---                           | N/A             | N/A              | N/A             | N/A    | N/A              | N/A             |
| Piasecki, 2015 | 1          | Int: OncoVEXmuGM-CSF + Anti-PD1 | --- | T-VEC: ---                    | Every 3 days     | 3 doses                       | Anti-PD-1: ---  | Twice per wk     | ---             | N/A    | N/A              | N/A             |
|                |            | Int: OncoVEXmuGM-CSF            | --- | T-VEC: ---                    | ---              | ---                           | ---             | ---              | ---             | ---    | ---              | ---             |
|                |            | Con: Anti-PD-1                  | --- | Anti-PD-1: ---                | ---              | ---                           | ---             | ---              | ---             | ---    | ---              | ---             |
| Piasecki, 2013 | 1          | Int: T-VEC                      | --- | 5x10 <sup>6</sup> PFU         | single           | single                        | N/A             | N/A              | N/A             | N/A    | N/A              | N/A             |
|                |            | Con: Vehicle                    | --- | ---                           | single           | single                        | N/A             | N/A              | N/A             | N/A    | N/A              | N/A             |
| Liu, 2003      | 1          | Int: JS1/34.5-/47-/mGM-CSF      | 10  | 10 <sup>6</sup> PFU/ml (50µl) | Every other day  | 3 doses – 5 days              | N/A             | N/A              | N/A             | N/A    | N/A              | N/A             |
|                |            |                                 | 10  | 10 <sup>7</sup> PFU/ml (50µl) | Every other day  | 3 doses – 5 days              | N/A             | N/A              | N/A             | N/A    | N/A              | N/A             |
|                |            |                                 | 10  | 10 <sup>8</sup> PFU/ml (50µl) | Every other day  | 3 doses – 5 days              | N/A             | N/A              | N/A             | N/A    | N/A              | N/A             |
|                |            | Int: JS1/34.5-/47-              | 10  | 10 <sup>6</sup> PFU/ml (50µl) | Every other day  | 3 doses – 5 days              | N/A             | N/A              | N/A             | N/A    | N/A              | N/A             |
|                |            |                                 | 10  | 10 <sup>7</sup> PFU/ml (50µl) | Every other day  | 3 doses – 5 days              | N/A             | N/A              | N/A             | N/A    | N/A              | N/A             |
|                |            |                                 | 10  | 10 <sup>8</sup> PFU/ml (50µl) | Every other day  | 3 doses – 5 days              | N/A             | N/A              | N/A             | N/A    | N/A              | N/A             |
|                |            | Con: vehicle                    | 10  | 50µl                          | Every other day  | 3 doses – 5 days              | N/A             | N/A              | N/A             | N/A    | N/A              | N/A             |
|                |            |                                 | 2   | Int: JS1/34.5-/47-/mGM-CSF    | 10               | 10 <sup>8</sup> PFU/ml (50µl) | Every other day | 3 doses – 5 days | N/A             | N/A    | N/A              | N/A             |
|                |            | Con: Vehicle                    | 10  | 50µl                          | Every other day  | 3 doses – 5 days              | N/A             | N/A              | N/A             | N/A    | N/A              |                 |

All doses of T-VEC were given by injection intratumorally

---: not reported

Int: intervention; Con: control; wk: week; PFU: plaque forming units

Cooke, 2016 did not provide any relevant information

## Online Supplementary File 4.. Clinical Study Characteristics

| Author, Year     | Country                            | Year Study Conducted | Study Type                                       | Type of Cancer                              | Primary Outcomes                                                                                   | Secondary Outcomes                                                                                           |
|------------------|------------------------------------|----------------------|--------------------------------------------------|---------------------------------------------|----------------------------------------------------------------------------------------------------|--------------------------------------------------------------------------------------------------------------|
| Andtbacka, 2015  | USA, UK, Canada and South Africa   | 2009-2014            | Interventional; Randomized (OPTiM Trial)         | Melanoma                                    | Efficacy: DRR                                                                                      | Efficacy: ORR<br>OS<br>Best Overall Response<br>Onset and duration of response<br>Time to treatment failure  |
| Long 2015        | USA, Australia, Switzerland, Spain | 2014-2022            | Interventional: Non-randomized, No control       | Melanoma                                    | Safety: Dose Limiting Toxicities                                                                   | Efficacy: DRR<br>OS<br>Progression Free Survival<br>Safety: AEs                                              |
| Puzanov, 2015    | USA                                | 2013-2014            | Interventional: Non-Randomized                   | Melanoma                                    | Safety: Dose Limiting Toxicities                                                                   | Efficacy: ORR<br>Safety: Grade $\geq 3$ AEs                                                                  |
| Chang, 2012      | USA                                | 2006-2008            | Interventional: Non-randomized, No control       | Pancreatic Cancer                           | Efficacy: Detection of T-VEC in blood and urine<br>Presence of Anti-HSV1 Antibodies<br>Safety: AEs | Efficacy: ORR<br>Change in sum of longest tumor diameter<br>Change in pain intensity                         |
| Harrington, 2010 | UK                                 | 2005-2010            | Interventional: Non-randomized, No control       | Squamous Cell Carcinoma                     | Safety: AEs                                                                                        | Efficacy: Antitumor Activity<br>OS*<br>Complete Response*<br>Partial Response*<br>Progression Free Survival* |
| Senzer 2009      | USA                                | 2005-2008            | Interventional; (non-controlled, non randomized) | Melanoma                                    | Efficacy: ORR                                                                                      | Efficacy: OS<br>Safety: AEs                                                                                  |
| Hu, 2006         | USA, UK                            | ---                  | Interventional: Non-randomized, No control       | Breast, Colorectal, Melanoma, Head and Neck | Efficacy: Biodistribution<br>Safety: AEs                                                           | Efficacy: GM-CSF expression<br>HSV antigen associated necrosis<br>Viral Replication<br>Local Reactions       |

---: Not Reported

\*: not reported a priori

AEs - adverse events; CHN- cutaneous head and neck; DRR – durable response rate; ECOG – Eastern Cooperative Oncology Group; ORR- objective response rate; OS – overall survival

**Online Supplementary File 5. Clinical Patient Characteristics**

| Author, Year     | Group                        | Patients (N) | Median Age (range) | Sex (n; F) | Metastasis Stage (n; Stage IVM1b/c) | Line of Therapy (n; first line) | HSV Serostatus (n; Seropositive, n; unknown) |
|------------------|------------------------------|--------------|--------------------|------------|-------------------------------------|---------------------------------|----------------------------------------------|
| Andtbacka, 2015  | T-VEC                        | 295          | 63 (22-94)         | 122        | 131                                 | 138                             | 175, 23                                      |
| Long, 2015       | T-VEC + Pembrolizumab        | 21           | 58                 | 13         | 11                                  | ---                             | ---                                          |
| Puzanov, 2015    | T-VEC + Ipilimumab           | 18           | ---                | ---        | ---                                 | 18                              | ---                                          |
| Chang, 2012      | T-VEC                        | 17           | 54                 | 6          | ---                                 | ---                             | ---                                          |
| Harrington, 2010 | T-VEC and Chemo radiotherapy | 17           | 58 (41-74)         | 2          | 3                                   | ---                             | ---                                          |
| Senzer, 2009     | T-VEC                        | 50           | 62 (34-88)         | 28         | 24                                  | 0                               | 36, 1                                        |
| Hu, 2006         | T-VEC                        | 30           | 55 (30-80)         | 23         | ---                                 | 0                               | 19                                           |

--- : Not Reported

For peer review only



## Online Supplementary File 6. Clinical Intervention and Comparator Characteristics

| Author, Year     | Arm                 | Dose 1                              | Time of Dose 1 | Frequency of Dose 1         | Dose 2                              | Time of Dose 2 | Frequency of Dose 2 | Dose 3                          | Time of Dose 3 | Frequency of Dose 3 | Intervention Window                        | Follow Up Duration         |
|------------------|---------------------|-------------------------------------|----------------|-----------------------------|-------------------------------------|----------------|---------------------|---------------------------------|----------------|---------------------|--------------------------------------------|----------------------------|
| Andtbacka, 2015  | T-VEC               | 10 <sup>6</sup> PFU/ml (≤4ml)       | Week 1         | single                      | 10 <sup>8</sup> PFU/ml (≤4ml)       | Week 4         | Q2W                 | N/A                             | N/A            | N/A                 | Median: 23 wks (0.1-79 wks)                | Median: 44 mo (32-58 mo)   |
|                  | GM-CSF              | 125 µg/m <sup>2</sup>               | Week 1         | Once daily 14/28 day cycles | N/A                                 | N/A            | N/A                 | N/A                             | N/A            | N/A                 | Median: 10 wks (0.6 to 72 wks)             | ---                        |
| Long, 2015       | T-VEC + Pemb.       | TVEC: 10 <sup>6</sup> PFU/ml        | Day 1          | single                      | T-VEC: 10 <sup>8</sup> PFU/ml       | Day 22         | Q2W                 | Pemb: 200 mg                    | Day 36         | Q2W                 | Median TVEC: 13 wks<br>Median Pemb: 10 wks | ---                        |
| Puzanov, 2015    | T-VEC + Ipilimumab  | TVEC: 10 <sup>6</sup> PFU/ml (≤4ml) | Week 1         | single                      | TVEC: 10 <sup>8</sup> PFU/ml (≤4ml) | Week 4         | Q2W                 | Ipilimumab: 3mg/kg              | Week 6         | Q3W                 | TVEC: until DLT<br>Ipi: 12 wks             | 17 mo minimum              |
| Chang, 2012      | Cohort 1            | 10 <sup>4</sup> PFU/ml              | Week 1*        | single                      | 10 <sup>5</sup> PFU/ml              | Week 4*        | Q3W*                | N/A                             | N/A            | N/A                 | up to 15 wks                               | ---                        |
|                  | Cohort 2            | 10 <sup>5</sup> PFU/ml              | Week 1         | single                      | 10 <sup>6</sup> PFU/ml              | Week 4         | Q3W                 | N/A                             | N/A            | N/A                 | up to 15 wks                               | ---                        |
|                  | Cohort 3            | 10 <sup>6</sup> PFU/ml              | Week 1         | single                      | 10 <sup>7</sup> PFU/ml              | Week 4         | Q3W                 | N/A                             | N/A            | N/A                 | up to 15 wks                               | ---                        |
| Harrington, 2010 | Cohort 1            | T-VEC: 10 <sup>6</sup> PFU/ml       | Day 1          | Q3W                         | Cisplatin: 100mg/m <sup>2</sup>     | Day 1          | Q3W                 | N/A                             | N/A            | N/A                 | Up to 9 weeks                              | Median: 29mo (19-40mo)     |
|                  | Cohort 2            | T-VEC: 10 <sup>6</sup> PFU/ml       | Day 1          | single                      | T-VEC: 10 <sup>7</sup> PFU/ml       | Day 22         | Q3W                 | Cisplatin: 100mg/m <sup>2</sup> | Day 1          | Q3W                 | Up to 9 weeks                              | Median: 29mo (19-40mo)     |
|                  | Cohort 3            | T-VEC: 10 <sup>6</sup> PFU/ml       | Day 1          | single                      | T-VEC: 10 <sup>8</sup> PFU/ml       | Day 22         | Q3W                 | Cisplatin: 100mg/m <sup>2</sup> | Day 1          | Q3W                 | Up to 9 weeks                              | Median: 29mo (19-40mo)     |
|                  | Cohort 4            | T-VEC: 10 <sup>6</sup> PFU/ml       | Day 1          | single                      | T-VEC: 10 <sup>8</sup> PFU/ml       | Day 22         | Q3W                 | Cisplatin: 100mg/m <sup>2</sup> | Day 1          | Q3W                 | Up to 9 weeks                              | Median: 29mo (19-40mo)     |
| Senzer, 2009     | T-VEC               | 10 <sup>6</sup> PFU/ml (≤4ml)       | Week 1         | Single                      | 10 <sup>8</sup> PFU/ml (≤4ml)       | Week 4         | Q2W                 | N/A                             | N/A            | N/A                 | Max: 48 wks<br>Median: 11 wks              | Median: 18 mo (11-36 mo)   |
| Hu, 2006         | Single Dose Group 1 | 10 <sup>6</sup> PFU/ml              | ---            | single                      | N/A                                 | N/A            | N/A                 | N/A                             | N/A            | N/A                 | Single dose                                | 6 wks                      |
|                  | Single Dose Group 2 | 10 <sup>7</sup> PFU/ml              | ---            | single                      | N/A                                 | N/A            | N/A                 | N/A                             | N/A            | N/A                 | Single dose                                | 6 wks                      |
|                  | Single Dose Group 3 | 10 <sup>8</sup> PFU/ml              | ---            | single                      | N/A                                 | N/A            | N/A                 | N/A                             | N/A            | N/A                 | Single dose                                | 6 wks                      |
|                  | Multi-dose Group 1  | 10 <sup>6</sup> PFU/ml              | ---            | single                      | 10 <sup>7</sup> PFU/ml              | ---            | Q1-3W               | N/A                             | N/A            | N/A                 | 3-9 wks*                                   | 6 wks post final injection |
|                  | Multi-dose Group 2  | 10 <sup>6</sup> PFU/ml              | ---            | single                      | 10 <sup>8</sup> PFU/ml              | ---            | Q1-3W               | N/A                             | N/A            | N/A                 | 3-9 wks*                                   | 6 wks post final injection |

| Author, Year | Arm                | Dose 1                 | Time of Dose 1 | Frequency of Dose 1 | Dose 2 | Time of Dose 2 | Frequency of Dose 2 | Dose 3 | Time of Dose 3 | Frequency of Dose 3 | Intervention Window | Follow Up Duration        |
|--------------|--------------------|------------------------|----------------|---------------------|--------|----------------|---------------------|--------|----------------|---------------------|---------------------|---------------------------|
|              | Multi-dose Group 3 | 10 <sup>8</sup> PFU/ml | ---            | Q1-3W               | N/A    | N/A            | N/A                 | N/A    | N/A            | N/A                 | 3-9 wks*            | 6wks post final injection |

DLT: Dose Limiting Toxicity; Pemb: Pembrolizumab; Q2W: every two weeks Q3W: every three weeks; Q1-3W: every 1-3 weeks; Q6W every 6 weeks

--- : not reported

T-VEC was given by intra-tumoral injection in all studies

For peer review only

Online Supplementary File 7. Preclinical Efficacy Data

| Author, Year   | Experiment | Group                                  | N – Animals Studied | N – Lesions Studied | Baseline Mean Tumor Measure (Standard Error of Mean) | Final Mean Tumor Measure (Standard Error of Mean) | CR - Injected | CR - Contralateral | Duration of Follow Up |
|----------------|------------|----------------------------------------|---------------------|---------------------|------------------------------------------------------|---------------------------------------------------|---------------|--------------------|-----------------------|
| Cooke, 2015    | 1          | INT: TVEC 3x10 <sup>4</sup> PFU        | 10                  | ---                 | ---                                                  | ---                                               | ---           | ---                | ---                   |
|                |            | INT: TVEC 3x10 <sup>6</sup> PFU        | 10                  | 10                  | ~150mm <sup>3</sup>                                  | ---                                               | 10/10         | 5/10               | ---                   |
|                |            | ---                                    | 10                  | ---                 | ---                                                  | ---                                               | ---           | ---                | ---                   |
|                |            | ---                                    | 10                  | ---                 | ---                                                  | ---                                               | ---           | ---                | ---                   |
| Piasecki, 2015 | 1          | INT: OncoVexmuGM-CSF                   | ---                 | ---                 | ---                                                  | ---                                               | ---           | ---                | ---                   |
|                |            | INT: OncoVexmuGM-CSF + Anti-PD-1       | ---                 | 20                  | ---                                                  | ---                                               | 8/10          | 2/10               | ---                   |
|                |            | CON: Anti Pd-1                         | ---                 | ---                 | ---                                                  | ---                                               | ---           | ---                | ---                   |
| Piasecki, 2013 | 1          | INT: T-VEC                             | ---                 | ---                 | ---                                                  | ---                                               | 70-100%       | 50-60%             | 10 days               |
|                |            | CON: Vehicle                           | ---                 | ---                 | ---                                                  | ---                                               | ---           | ---                | ---                   |
| Liu, 2003      | 1          | INT: JS1/34.5-/47-/mGM-CSF; injected   | 10                  | N/A                 | 5.2mm (0.34)                                         | 0.004mm (0.31)                                    | N/A           | N/A                | 22 days               |
|                |            | INT: JS1/34.5-/47-/mGM-CSF; injected   | 10                  | N/A                 | 5.7mm (0.29)                                         | 1.1 mm (0.73)                                     | N/A           | N/A                | 22 days               |
|                |            | INT: JS1/34.5-/47-/mGM-CSF; uninjected | (same as injected)  | N/A                 | ---                                                  | ---                                               | ---           | ---                | ---                   |
|                |            | INT: JS1/34.5-/47-; injected           | 10                  | N/A                 | 5.4mm (0.37)                                         | 1.4 mm (1.36)                                     | N/A           | N/A                | 22 days               |
|                |            | INT: JS1/34.5-/47-; uninjected         | 10                  | N/A                 | 6.2mm (0.29)                                         | 5.4mm (2.01)                                      | N/A           | N/A                | 22 days               |
|                |            | CON: Vehicle; injected                 | 10                  | N/A                 | 5.4mm (0.40)                                         | 11.9mm (2.69)                                     | N/A           | N/A                | 22 days               |
|                |            | CON: Vehicle; uninjected               | 10                  | N/A                 | 5.6mm (0.46)                                         | 13.2mm (2.76)                                     | N/A           | N/A                | 22 days               |
|                |            | CON: Vehicle; injected                 | (same as injected)  | N/A                 | ---                                                  | ---                                               | ---           | ---                | ---                   |
|                | 2          | INT: JS1/34.5-/47-/mGM-CSF             | 10                  | N/A                 | 5.5mm (0.34)                                         | 2.2mm (1.6)                                       | N/A           | N/A                | 21 days               |
|                |            | CON: Vehicle                           | 10                  | N/A                 | 5.6mm (0.23)                                         | 13.8mm (1.2)                                      | N/A           | N/A                | 21 days               |

--- : not reported  
 INT: intervention  
 CON: control

Liu 2003 data from experiment 1 taken from 10<sup>8</sup> dose  
 Cooke, 2016 did not provide any relevant information



# PRISMA 2009 Checklist

| Section/topic                      | #  | Checklist item                                                                                                                                                                                                                                                                                              | Reported on page # |
|------------------------------------|----|-------------------------------------------------------------------------------------------------------------------------------------------------------------------------------------------------------------------------------------------------------------------------------------------------------------|--------------------|
| <b>TITLE</b>                       |    |                                                                                                                                                                                                                                                                                                             |                    |
| Title                              | 1  | Identify the report as a systematic review, meta-analysis, or both.                                                                                                                                                                                                                                         | 1                  |
| <b>ABSTRACT</b>                    |    |                                                                                                                                                                                                                                                                                                             |                    |
| Structured summary                 | 2  | Provide a structured summary including, as applicable: background; objectives; data sources; study eligibility criteria, participants, and interventions; study appraisal and synthesis methods; results; limitations; conclusions and implications of key findings; systematic review registration number. | 2-3                |
| <b>INTRODUCTION</b>                |    |                                                                                                                                                                                                                                                                                                             |                    |
| Rationale                          | 3  | Describe the rationale for the review in the context of what is already known.                                                                                                                                                                                                                              | 3                  |
| Objectives                         | 4  | Provide an explicit statement of questions being addressed with reference to participants, interventions, comparisons, outcomes, and study design (PICOS).                                                                                                                                                  | 3                  |
| <b>METHODS</b>                     |    |                                                                                                                                                                                                                                                                                                             |                    |
| Protocol and registration          | 5  | Indicate if a review protocol exists, if and where it can be accessed (e.g., Web address), and, if available, provide registration information including registration number.                                                                                                                               | 4                  |
| Eligibility criteria               | 6  | Specify study characteristics (e.g., PICOS, length of follow-up) and report characteristics (e.g., years considered, language, publication status) used as criteria for eligibility, giving rationale.                                                                                                      | 4                  |
| Information sources                | 7  | Describe all information sources (e.g., databases with dates of coverage, contact with study authors to identify additional studies) in the search and date last searched.                                                                                                                                  | 5                  |
| Search                             | 8  | Present full electronic search strategy for at least one database, including any limits used, such that it could be repeated.                                                                                                                                                                               | 5                  |
| Study selection                    | 9  | State the process for selecting studies (i.e., screening, eligibility, included in systematic review, and, if applicable, included in the meta-analysis).                                                                                                                                                   | 5                  |
| Data collection process            | 10 | Describe method of data extraction from reports (e.g., piloted forms, independently, in duplicate) and any processes for obtaining and confirming data from investigators.                                                                                                                                  | 5-6                |
| Data items                         | 11 | List and define all variables for which data were sought (e.g., PICOS, funding sources) and any assumptions and simplifications made.                                                                                                                                                                       | 5-6                |
| Risk of bias in individual studies | 12 | Describe methods used for assessing risk of bias of individual studies (including specification of whether this was done at the study or outcome level), and how this information is to be used in any data synthesis.                                                                                      | 6                  |
| Summary measures                   | 13 | State the principal summary measures (e.g., risk ratio, difference in means).                                                                                                                                                                                                                               | 7                  |
| Synthesis of results               | 14 | Describe the methods of handling data and combining results of studies, if done, including measures of consistency (e.g., I <sup>2</sup> ) for each meta-analysis.                                                                                                                                          | 7                  |

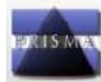

# PRISMA 2009 Checklist

Page 1 of 2

| Section/topic                 | #  | Checklist item                                                                                                                                                                                           | Reported on page # |
|-------------------------------|----|----------------------------------------------------------------------------------------------------------------------------------------------------------------------------------------------------------|--------------------|
| Risk of bias across studies   | 15 | Specify any assessment of risk of bias that may affect the cumulative evidence (e.g., publication bias, selective reporting within studies).                                                             | 6                  |
| Additional analyses           | 16 | Describe methods of additional analyses (e.g., sensitivity or subgroup analyses, meta-regression), if done, indicating which were pre-specified.                                                         | N/A                |
| <b>RESULTS</b>                |    |                                                                                                                                                                                                          |                    |
| Study selection               | 17 | Give numbers of studies screened, assessed for eligibility, and included in the review, with reasons for exclusions at each stage, ideally with a flow diagram.                                          | 7                  |
| Study characteristics         | 18 | For each study, present characteristics for which data were extracted (e.g., study size, PICOS, follow-up period) and provide the citations.                                                             | 7-8                |
| Risk of bias within studies   | 19 | Present data on risk of bias of each study and, if available, any outcome level assessment (see item 12).                                                                                                | 9-10               |
| Results of individual studies | 20 | For all outcomes considered (benefits or harms), present, for each study: (a) simple summary data for each intervention group (b) effect estimates and confidence intervals, ideally with a forest plot. | 8-9                |
| Synthesis of results          | 21 | Present results of each meta-analysis done, including confidence intervals and measures of consistency.                                                                                                  | 8-9                |
| Risk of bias across studies   | 22 | Present results of any assessment of risk of bias across studies (see Item 15).                                                                                                                          | 9-10               |
| Additional analysis           | 23 | Give results of additional analyses, if done (e.g., sensitivity or subgroup analyses, meta-regression [see Item 16]).                                                                                    | N/A                |
| <b>DISCUSSION</b>             |    |                                                                                                                                                                                                          |                    |
| Summary of evidence           | 24 | Summarize the main findings including the strength of evidence for each main outcome; consider their relevance to key groups (e.g., healthcare providers, users, and policy makers).                     | 11-12              |
| Limitations                   | 25 | Discuss limitations at study and outcome level (e.g., risk of bias), and at review-level (e.g., incomplete retrieval of identified research, reporting bias).                                            | 12-13              |
| Conclusions                   | 26 | Provide a general interpretation of the results in the context of other evidence, and implications for future research.                                                                                  | 13                 |
| <b>FUNDING</b>                |    |                                                                                                                                                                                                          |                    |
| Funding                       | 27 | Describe sources of funding for the systematic review and other support (e.g., supply of data); role of funders for the systematic review.                                                               | 14                 |

From: Moher D, Liberati A, Tetzlaff J, Altman DG, The PRISMA Group (2009). Preferred Reporting Items for Systematic Reviews and Meta-Analyses: The PRISMA Statement. PLoS Med 6(7): e1000097. doi:10.1371/journal.pmed1000097

For more information, visit: [www.prisma-statement.org](http://www.prisma-statement.org).

Page 2 of 2

For peer review only - <http://bmjopen.bmj.com/site/about/guidelines.xhtml>

# BMJ Open

## Mapping the preclinical to clinical evidence and development trajectory of the oncolytic virus talimogene laherparepvec (T-VEC): a systematic review

|                                 |                                                                                                                                                                                                                                                                                                                                                                                                                                                                                                                                        |
|---------------------------------|----------------------------------------------------------------------------------------------------------------------------------------------------------------------------------------------------------------------------------------------------------------------------------------------------------------------------------------------------------------------------------------------------------------------------------------------------------------------------------------------------------------------------------------|
| Journal:                        | <i>BMJ Open</i>                                                                                                                                                                                                                                                                                                                                                                                                                                                                                                                        |
| Manuscript ID                   | bmjopen-2019-029475.R2                                                                                                                                                                                                                                                                                                                                                                                                                                                                                                                 |
| Article Type:                   | Original research                                                                                                                                                                                                                                                                                                                                                                                                                                                                                                                      |
| Date Submitted by the Author:   | 01-Nov-2019                                                                                                                                                                                                                                                                                                                                                                                                                                                                                                                            |
| Complete List of Authors:       | Lalu, Manoj; Ottawa Hospital Research Institute, Clinical Epidemiology<br>Leung, Garvin; Ottawa Hospital Research Institute, Clinical Epidemiology<br>Dong, Yuan Yi; Ottawa Hospital Research Institute, Clinical Epidemiology<br>Montroy, Joshua; Ottawa Hospital Research Institute, Clinical Epidemiology<br>Butler, Claire; Ottawa Hospital Research Institute, Clinical Epidemiology<br>Auer, Rebecca; Ottawa Hospital Research Institute, Clinical Epidemiology<br>Fergusson, Dean; Ottawa Hospital Research Institute, Medicine |
| <b>Primary Subject Heading</b>: | Epidemiology                                                                                                                                                                                                                                                                                                                                                                                                                                                                                                                           |
| Secondary Subject Heading:      | Oncology                                                                                                                                                                                                                                                                                                                                                                                                                                                                                                                               |
| Keywords:                       | TVEC, oncolytic virus, cancer, translation, review                                                                                                                                                                                                                                                                                                                                                                                                                                                                                     |
|                                 |                                                                                                                                                                                                                                                                                                                                                                                                                                                                                                                                        |

SCHOLARONE™  
Manuscripts

1  
2  
3 **Mapping the preclinical to clinical evidence and development trajectory of the oncolytic**  
4 **virus talimogene laherparepvec (T-VEC): a systematic review**  
5  
6  
7

8 **Manoj M. Lalu† MD, PhD, FRCPC<sup>1,2,3,4</sup>, Garvin J. Leung† MPH<sup>2,5</sup>, Yuan Yi Dong<sup>2,5</sup>,**  
9 **Joshua Montroy MSc,<sup>2</sup> Claire Butler<sup>2</sup>, Rebecca C. Auer MD, MSc, FRCSC<sup>7,8</sup>,**  
10 **Dean A. Fergusson PhD, MHA<sup>\*2,6,7</sup>**  
11  
12  
13

14 <sup>1</sup>Department of Anesthesiology and Pain Medicine, The Ottawa Hospital, University of Ottawa,  
15 Ottawa, ON, Canada

16 <sup>2</sup>Blueprint Translational Research Group, Clinical Epidemiology Program, Ottawa Hospital  
17 Research Institute, Ottawa, ON, Canada

18 <sup>3</sup> Regenerative Medicine Program, Ottawa Hospital Research Institute, Ottawa, ON, Canada

19 <sup>4</sup>Department of Cellular and Molecular Medicine, University of Ottawa, Ottawa, ON, Canada

20 <sup>5</sup>Faculty of Medicine, University of Ottawa, Ottawa, ON, Canada

21 <sup>6</sup>School of Epidemiology and Public Health, University of Ottawa, Ottawa, ON, Canada

22 <sup>7</sup>Department of Surgery, The Ottawa Hospital, University of Ottawa, Ottawa, ON, Canada

23 <sup>8</sup>Cancer Therapeutics Program, Ottawa Hospital Research Institute, Ottawa, ON, Canada

24 † These authors contributed equally to this work  
25  
26  
27

28 Emails: MML: [mlalu@toh.ca](mailto:mlalu@toh.ca); GJL: [garvin.leung@uottawa.ca](mailto:garvin.leung@uottawa.ca); YYD: [ydong044@uottawa.ca](mailto:ydong044@uottawa.ca);  
29 JM: [jmontroy@ohri.ca](mailto:jmontroy@ohri.ca); CB: [clbutler@toh.ca](mailto:clbutler@toh.ca); RCA: [rauer@toh.ca](mailto:rauer@toh.ca); DAF: [dafergusson@ohri.ca](mailto:dafergusson@ohri.ca)  
30  
31

32 \*Corresponding author:

33 Dean A. Fergusson email: [dafergusson@ohri.ca](mailto:dafergusson@ohri.ca)

34 Centre for Practice-Changing Research,

35 Office L1298a

36 501 Smyth Road, Box 201B

37 Ottawa, Ontario, Canada K1H 8L6

38 Tel. 1-613-737-8480

39 Fax. 1-613-739-6938  
40  
41  
42  
43  
44

45 Running Head: The efficacy of T-VEC: A systematic review  
46  
47

48 Word count: 3276  
49  
50  
51  
52  
53  
54  
55  
56  
57  
58  
59  
60

## ABSTRACT

**Objective:** This study aimed to conduct a systematic review of preclinical and clinical evidence to chart the successful trajectory of Talimogene laherparepvec (T-VEC), from the bench to the clinic.

**Design:** This study was a systematic review. The primary outcome of interest was the efficacy of treatment, determined by complete response. Abstract and full-text selection as well as data extraction was done by two independent reviewers. The Cochrane risk of bias tool was used to assess the risk of bias in studies.

**Setting:** Embase, Embase Classic, and OvidMedline were searched from inception until May 2016 to assess its development trajectory to approval in 2015.

**Participants:** Preclinical and clinical controlled comparison studies, as well as observational studies.

**Interventions:** T-VEC for treatment of any malignancy.

**Results:** 8,852 records were screened and five preclinical (n=150 animals) and seven clinical studies (n=589 patients) were included. We saw large decreases in T-VEC's efficacy as studies moved from the laboratory to patients, and as studies became more methodologically rigorous. Preclinical studies reported complete regression rates up to 100% for injected tumors and 80% for contralateral tumors, while the highest degree of efficacy seen in the clinical setting was a 24% complete response rate, with one study experiencing a complete response rate of 0%. We were unable to reliably assess safety due to the lack of reporting, as well as the heterogeneity seen in adverse event definitions. All preclinical studies had high or unclear risk of bias, and all clinical studies were at a high risk of bias in at least one domain.



1  
2  
3 **Conclusions:** Our findings illustrate that even successful biotherapeutics may not demonstrate a  
4 clear translational road map. This emphasizes the need to consider increasing rigour and  
5  
6  
7  
8 transparency along the translational pathway.  
9

10 **PROSPERO Registration Number:** CRD42016043541  
11

12  
13 **Keywords:** T-VEC, oncolytic virus, cancer, translation, review  
14  
15

### 16 17 18 19 **Strengths and limitations of this study** 20

- 21 • Comprehensive, up-to-date review of the efficacy and safety of T-VEC
- 22 • Threats to both internal validity and construct validity were performed
- 23 • Reporting of methods and findings was incomplete in most of the studies included
- 24 • Poor reporting and study design are major contributors to the ongoing reproducibility crisis
- 25  
26  
27  
28  
29  
30  
31  
32 in preclinical research  
33  
34  
35  
36  
37  
38  
39  
40  
41  
42  
43  
44  
45  
46  
47  
48  
49  
50  
51  
52  
53  
54  
55  
56  
57  
58  
59  
60

## BACKGROUND

Preclinical research receives approximately half of the world's biomedical research funding, yet very few of its findings translate clinically. This represents an enormous waste of resources with an estimated 28 billion dollars per year in the US alone being spent on biomedical research which is not reproducible and therefore not translatable.(1) One study found that only 5% of highly efficacious preclinical therapeutics were clinically translated.(2) These successes often take almost twenty years to become successfully translated across the research spectrum. (2, 3)

Although the process of clinical translation is complicated, the transition from bench-to-bedside often starts with preclinical research. These investigations (usually on animals or cells), are aimed at studying efficacy, pharmacokinetics and dynamics, as well as detailing safety.(4) Next, a drug is tested in a phase I clinical trial, which usually contains a small number of participants and is aimed at studying the safety of the drug. If a drug is safe, it may proceed to phase II which are larger than phase I studies and are designed to test safety, pharmacokinetics, pharmacodynamics, and optimal dosing regimens. They may also offer preliminary evidence of drug efficacy. Finally, a methodologically rigorous phase III study is performed. These studies are designed and powered to test efficacy in the patient population of interest (usually against a comparator such as placebo), as well as identify rarer adverse events which may have gone unnoticed in a smaller phase I or II study.(5)

Given the high failure rate in translating therapies across this spectrum, as well as significant time-lags associated with translation, it is important that we examine the few agents that have successfully crossed the preclinical-to-clinical bridge in order to learn from and replicate their success. Thus, we conducted a comprehensive evaluation of available evidence supporting the successful translation of Talimogene laherparepvec (T-VEC). T-VEC is a modified HSV-1 virus

1  
2  
3 produced by *Amgen* and it is the first, and only, FDA approved oncolytic virus therapy; it is  
4 currently approved to treat advanced melanoma.(6) Oncolytic viruses are an emerging cancer  
5 therapy that work by preferentially targeting and infecting cancer cells.(6) Upon infection,  
6 oncolytic viruses can induce an anti-tumor immune response that reduces tumor burden. TVEC  
7 was chosen as a model due to the fact that it is the only approved oncolytic virus therapy to date,  
8 despite the multitude of agents under investigation.(7)  
9  
10  
11  
12  
13  
14  
15  
16

17 Through a careful evaluation of T-VEC development we hoped to identify factors that may  
18 contribute to bench-to-bedside success. This may serve an exemplar for other therapies as they  
19 move along the translational continuum. Thus, the purpose of this systematic review was to map  
20 the successful preclinical to clinical trajectory of T-VEC to inform the development paths of future  
21 biotherapeutics.  
22  
23  
24  
25  
26  
27  
28  
29  
30  
31  
32  
33  
34  
35  
36  
37  
38  
39  
40  
41  
42  
43  
44  
45  
46  
47  
48  
49  
50  
51  
52  
53  
54  
55  
56  
57  
58  
59  
60

## METHODS

Our review was registered in full on PROSPERO, the international prospective register of systematic reviews (no. CRD42016043541). The review is reported in accordance to the PRISMA guidelines.(8)

### Eligibility Criteria

We included all clinical and preclinical *in vivo* controlled comparison studies of T-VEC for treatment of any malignancy (randomized, pseudo-randomized, and non-randomized studies), as well as observational studies such as case-control, case-series and case reports. Studies reporting only *ex vivo* or *in vitro* experiments were excluded. For both preclinical and clinical studies, we included studies that administered T-VEC as a monotherapy or in combination with other therapies for treatment of malignancy. We had no exclusions on comparison treatments, which include standard line therapy or no treatment.

### Outcomes

The primary outcome of interest was the efficacy of treatment. Our primary indicator of efficacy was complete response. Other measures of efficacy such as survival, response rates (durable, partial, objective), time to treatment failure, and disease stability were also collected. Such measures were based on the Response Evaluation Criteria in Solid Tumors (RECIST) Guidelines.(9) In preclinical studies, additional measures of efficacy such as changes in mean tumor volume and number of lesions were collected. The primary indicator of efficacy, complete response, was used as the primary outcome regardless of reporting within the individual study, in order to assess the continuity of evidence along the research spectrum. The secondary outcome of

1  
2  
3 interest was safety, for which we collected data on all adverse events in preclinical and clinical  
4  
5 studies.  
6  
7

## 8 **Literature Search**

9

10  
11 In collaboration with a medical information specialist (Risa Shorr, Learning Services, The Ottawa  
12  
13 Hospital) a search strategy was designed to identify all relevant preclinical and clinical studies.  
14  
15 Searches were conducted in the following databases: Embase, Embase Classic, and OvidMedline  
16  
17 from inception until May 2016. This time frame was chosen to ensure all published studies that  
18  
19 contributed T-VECs FDA approval in 2015 were included. Search terms included: Talimogen  
20  
21 laherparepvec, Tvec, OncoVEX and Imlygic. Additional terms pertaining to preclinical studies  
22  
23 (e.g. animal experiment/model) and oncology (e.g. cancer, neoplasm, oncolytic virus) were also  
24  
25 included. Studies were also screened for inclusion based on reference tracking, by scanning the  
26  
27 bibliography of included primary studies and relevant review articles. We did not impose any  
28  
29 restrictions on language or publication type. A grey literature search was not performed. The  
30  
31 finalized search strategy can be found in online supplementary file 1.  
32  
33  
34  
35  
36

## 37 **Study Selection Process**

38

39  
40 Studies identified by our literature search were collated and duplicates were removed. Titles and  
41  
42 abstracts were independently screened for inclusion by two reviewers using DistillerSR (Evidence  
43  
44 Partners, Ottawa, ON). Those deemed potentially relevant were recorded, and full-text articles  
45  
46 were obtained. The same reviewers screened full articles for final eligibility. Disagreements at  
47  
48 any stage were resolved by discussion or by consultation with a senior team member when  
49  
50 necessary. The study selection process was documented using a PRISMA flow diagram (Figure  
51  
52  
53  
54 1).  
55  
56  
57  
58  
59  
60

## Data Extraction

All data extraction was completed independently and in duplicate, using a standardized and piloted data extraction form, with disagreements resolved as mentioned above. Data pertaining to general and intervention characteristics of the included studies were extracted (e.g. study design, country, type of malignancy, dosing of intervention and comparator treatments). For clinical studies, data was collected on patient characteristics (e.g. age, sex, cancer staging, HSV status). For preclinical studies, characteristics on the animal model were extracted (e.g. type of species, cell line used, disease induction method, age, sex, weight).

## Risk of bias – assessment to risk of internal validity

Clinical studies that met inclusion criteria were assessed for risk of bias in duplicate, according to the recommended methodology of the Cochrane Collaboration.<sup>(10)</sup> Five types of biases (selection, performance, detection, attrition, reporting biases) were assessed using six domains: randomization, allocation concealment, blinding of participants/personnel, outcome assessment blinding, incomplete outcome reporting, and selective outcome reporting. Additional domains assessed for risk of bias were: i) reported conflicts of interest, ii.) sample size calculation, and iii.) funding. Each domain was given a score of “high”, “unclear”, or “low” risk of bias for each study. Risk of bias assessment for preclinical studies were assessed using a modified Cochrane Risk of Bias tool and assessed the same domains as indicated for clinical studies.<sup>(11)</sup>

## Assessment of threats to construct validity

Construct validity is the concept in how much a preclinical experiment (i.e. animal studies) corresponds to the clinical entity it is intended to model. There are various threats to construct validity that can be introduced from the preclinical study design. The items evaluated in duplicate

1  
2  
3 for each preclinical study include: i.) use of adult animals, ii.) use of animals with advanced stage  
4 disease (defined as the presence of multiple visceral lesions and/or clinical/histological signs of  
5 malignant progression), iii.) immune status of animals to HSV, iv.) whether a xenograft model was  
6 used, and v.) the use of a humanized immune system model. Each of these items was given a score  
7 of “yes”, “no”, or “unclear” for every preclinical study.  
8  
9  
10  
11  
12  
13

### 14 15 **Statistical Analysis**

16  
17  
18 Efficacy was expressed as proportions with accompanying 95% confidence intervals. If confidence  
19 intervals were not present within the individual study, they were calculated via standard  
20 methods.<sup>(12)</sup> To assess the continuity between preclinical and clinical studies, the efficacy of  
21 studies was plotted as percentage response.  
22  
23  
24  
25  
26  
27

### 28 **Deviations from Protocol**

29  
30  
31 We were unable to assess safety as we could not acquire patient-level safety data. Furthermore,  
32 our primary efficacy outcome stated in protocol was durable response rate. However, this was  
33 changed to complete response as most clinical studies did not report durable response and we  
34 needed to track TVEC’s trajectory over several studies. We acknowledge the limitation of this  
35 approach, given the FDA approved TVEC based on the OPTIM trial,<sup>(13)</sup> the primary endpoint of  
36 which was durable response rate. Subgroup analyses, meta-analyses, Egger’s test, and pooling of  
37 data could not be conducted due to the limited available data.  
38  
39  
40  
41  
42  
43  
44  
45  
46  
47

### 48 **Patient and Public Involvement**

49  
50  
51 Patients and the public were not involved in this research.  
52

## 53 **RESULTS**

1  
2  
3 Upon removal of duplicates, a total of 8,852 references were identified by the electronic search.  
4  
5 During the review of titles and abstracts, 7,890 references were excluded. Following full text  
6  
7 screening, another 938 articles were excluded for reasons such as wrong study design (i.e. review  
8  
9 article), or wrong study intervention (i.e. a different cancer therapeutic). A total of 7 clinical  
10  
11 studies,(13-19) and 5 preclinical studies(20-24) were included in our review (Figure 1).  
12  
13

### 14 ***Characteristics of Included Trials***

15  
16 Characteristics of included studies are shown in Table 1. Preclinical studies were published  
17  
18 between 2003 and 2016 and sample sizes ranged from 20 to 90. Of the 5 preclinical studies, three  
19  
20 used a lymphoma model, one used a colorectal model, and one used a melanoma model. All studies  
21  
22 were performed in mice. The duration of follow-up was reported by two studies and ranged from  
23  
24 10 days to 35 days. The dose of T-VEC used ranged from  $3 \times 10^4$  plaque forming units (PFU) to  
25  
26  $5 \times 10^6$  PFU. One frequency of T-VEC administration varied from, every three days for one week,  
27  
28 every three days for nine days, a single dose given only once, and every other day for five days.  
29  
30 Specific details of study and intervention characteristics for each preclinical study can be found in  
31  
32 online supplementary files 2 and 3.  
33  
34  
35  
36  
37

38  
39 Clinical studies were published between 2006 and 2016 and took place in seven countries. Sample  
40  
41 sizes ranged from 17 to 295. Of the seven clinical studies, four were in melanoma patients, one  
42  
43 was in pancreatic cancer patients, one in head and neck cancer patients and one studied a mix of  
44  
45 breast, colorectal, melanoma and head and neck cancer patients. Six were either Phase I or II, and  
46  
47 one trial was a Phase III evaluation. The primary outcome was efficacy in two studies, safety in  
48  
49 three studies and a combination of efficacy and safety in the other two studies. The duration of  
50  
51 follow-up ranged from six weeks to 44 months.  
52  
53  
54  
55  
56  
57  
58  
59  
60



1  
2  
3 T-VEC was administered alone in four studies, while it was administered immediately following  
4  
5 to systemic therapy in 3 studies. The dose of T-VEC administered ranged from  $10^4$  PFU/mL to  $10^8$   
6  
7 PFU/mL. In the large, Phase III study, T-VEC was administered at  $\leq 4\text{mL} \times 10^6$  PFU/mL once, and  
8  
9 then three weeks later,  $\leq 4\text{mL} \times 10^8$  PFU/mL was administered every two weeks for a median of 23  
10  
11 weeks. A similar dosing regimen was used in three other trials. The other three trials were dose-  
12  
13 finding in nature and had multiple trial arms receiving increasing doses of T-VEC. In-depth study  
14  
15 details, as well as participant and intervention details for each study can be found in online  
16  
17 supplementary files 4, 5, and 6.  
18  
19  
20  
21

### 22 ***Efficacy of Treatment***

23  
24  
25 Treatment efficacy for each study is summarized in Table 1 and Figure 2. Preclinical studies  
26  
27 reported complete regression rates up to 100% for injected tumors and 80% for contralateral  
28  
29 tumors (see also online supplementary file 7). In comparison, the first published Phase I T-VEC  
30  
31 clinical trial reported a complete response of 0% for cutaneous lesions caused by malignancies of  
32  
33 head and neck, breast, colorectal, and melanoma. Of the multiple malignancies treated, melanoma  
34  
35 had the best response in this trial. Subsequent Phase I/II melanoma trials were then conducted and  
36  
37 demonstrated complete response rates of 20-22%. This was followed by the Phase III OPTIM  
38  
39 melanoma trial, which had a complete response rate of 10.8%. Studies involving non-melanoma  
40  
41 cancers varied with efficacies between 0-24%  
42  
43  
44  
45

### 46 ***Safety of treatment***

47  
48  
49 We attempted to assess safety across clinical studies, however we were unable to obtain patient  
50  
51 level data from any of the studies. The definitions of adverse events, and the manner in which they  
52  
53 were classified, was found to be highly heterogenous across studies. Studies did not specify what  
54  
55  
56  
57  
58  
59  
60

1  
2  
3 percent of adverse events were repeated adverse events from the same patient(s), used different  
4 criteria for recording and reporting adverse events, categorized them differently, etc. Therefore,  
5  
6 we were unable to pool adverse events or interpret findings reliably.  
7  
8  
9

### 10 *Validity Assessments*

11  
12  
13 Construct validity, the concept of how well an animal model represents the clinical entity it is  
14 intended to mimic, was first assessed through the following domains: the use of appropriately-  
15 aged mice, advanced stage of disease, HSV-immunity, and types of mouse models. None of the  
16 preclinical studies fully reported or used methodologies to reduce threats to construct validity  
17 domains (Table 2). No studies declared using adult animal models, no studies used animals with  
18 late stage disease, only one study used animals immune to HSV, no studies used a xenograft model,  
19 and no studies reported using an animal model with a humanized immune system.  
20  
21  
22  
23  
24  
25  
26  
27  
28

29  
30 We also assessed internal validity (i.e. risk of bias) and found that all preclinical studies had high  
31 or unclear risk of bias across the assessed domains: randomization sequence, allocation  
32 concealment, blinding, incomplete reporting, sample size calculation, and funding source (Table  
33 3). For clinical studies, early phase trials had high or unclear risk of bias across at least six of nine  
34 domains whereas the more robust Phase III OPTIM trial had the lowest risk of bias and also the  
35 lowest efficacy of any of the published melanoma clinical trials (Table 4). Reporting of key  
36 methodological elements was lacking.  
37  
38  
39  
40  
41  
42  
43  
44  
45  
46

## 47 **DISCUSSION**

48  
49  
50 We hoped to synthesize the evidence to produce a clear road map of T-VEC's translation in the  
51 published literature to follow the journey of a successful biotherapeutic, to be used as a blueprint  
52 for similar efforts in the future. Yet, we were unable to paint a clear picture of how the evidence  
53  
54  
55  
56  
57  
58  
59  
60

1  
2  
3 was utilized in proceeding to melanoma clinical trials. Rather, our assessment uncovered a  
4 disconnect between *in vivo* preclinical and clinical findings. Furthermore, the road map was  
5 plagued with poor reporting, high risk of bias, and insufficient data along the translational path.  
6  
7 Overall, we were surprised by the pace and magnitude of diminishing efficacy as T-VEC moved  
8 from bench to bedside and then towards later phase clinical trials (i.e. Phase I to III). Although T-  
9 VEC was successful in terms of gaining regulatory approval, its translational path is complicated,  
10 and the pieces of the evidence puzzle do not easily fit together. While we appreciate that translation  
11 is not a predictable linear process, it is difficult to learn from the example of T-VEC given the  
12 available and reported pre-clinical and clinical evidence.  
13  
14

15 While many novel therapeutics are under intellectual property rights, details of study design and  
16 results should be transparently reported for scientists, clinicians, and patients to evaluate findings.  
17  
18 The fact that the only FDA approved oncolytic virus therapy is not clearly reported illustrates the  
19 issues plaguing the success of cancer therapeutics. Nonetheless, T-VEC has shown some efficacy  
20 in treating refractory melanoma(25) and numerous clinical trials are underway to assess its use in  
21 combination with other cancer regimens and in treating other malignancies. It is also the  
22 recommended treatment by the National Comprehensive Cancer Center for patients with in-transit  
23 melanoma.(26)  
24  
25

26 Perhaps the largest discrepancy noted was that only a single preclinical study used a melanoma  
27 model, whereas all but two clinical studies administered T-VEC to melanoma patients. Conversely,  
28 lymphoma, which was used in three preclinical studies, was not assessed in clinical studies.  
29  
30 Interestingly, our subsequent searches found that Amgen's FDA filing (STN# 125518.000) (27)  
31 for T-VEC did not appear to report on any *in vivo* melanoma models, whereas the EMA report did  
32 (EMA/734400/2015).(28) Thus, the majority of animal models were off-target from the  
33  
34  
35  
36  
37  
38  
39  
40  
41  
42  
43  
44  
45  
46  
47  
48  
49  
50  
51  
52  
53  
54  
55  
56  
57  
58  
59  
60

1  
2  
3 malignancies studied in clinical trials and may have poorly represented melanoma in the clinical  
4 setting. Coupled with these findings was the fact that the majority of our studies were found to be  
5  
6 at a high risk of bias. Such threats to internal validity can bias results and may help explain T-  
7  
8 VEC's superior preclinical efficacy compared to later phase clinical trials. A lack of randomization  
9  
10 and blinding in preclinical studies has been associated with inflated effect sizes,(29, 30) thus this  
11  
12 may partially explain the preclinical to clinical discrepancy of T-VEC.  
13  
14  
15

16  
17 Reporting of methods and findings was incomplete in most of the studies included. Only one full  
18  
19 preclinical article on T-VEC was published, and solely aggregate patient data for later phase trials  
20  
21 was available. Poor reporting and study design are major contributors to the ongoing  
22  
23 reproducibility crisis in preclinical research.(31) Thus, in hopes of presenting a clearer picture of  
24  
25 T-VEC's successful translation, we contacted *Amgen* to obtain preclinical *in vivo* melanoma data,  
26  
27 patient-level safety data, and any additional efficacy data. Patient-level data would afford the  
28  
29 ability to combine data across T-VEC's clinical development and also provide clarification into  
30  
31 the categorization of adverse events. Recently, release of individual patient data to third parties  
32  
33 has been advocated by the Institute of Medicine, journal editors, and others as it enhances  
34  
35 transparency, enables re-analyses of data, and helps address reproducibility.(32) The reporting of  
36  
37 harms in clinical trials remains an issue in the scientific community,(33-35) and represents a  
38  
39 roadblock to translational success. Some basic steps required to improve the reporting of safety in  
40  
41 translational research include the development of standardized scales and instruments, instituting  
42  
43 active rather than passive surveillance for toxicity, including detailed information on participant  
44  
45 withdrawals due to toxicity, reporting the timing, frequency, and duration of clinically relevant  
46  
47 events, and the publication of raw data.(36, 37) *Amgen*, however, was unwilling to enter a data  
48  
49 sharing agreement, as they stated that there was little value to compel a transparent data release  
50  
51  
52  
53  
54  
55  
56  
57  
58  
59  
60

1  
2  
3 for our proposed analyses. This lack of transparency and incomplete reporting is disappointing,  
4 especially considering that it was *Amgen* that previously highlighted poor reporting as contributing  
5 to its own failure to reproduce 47 of 53 high-impact preclinical cancer studies.(38) Their findings  
6 fuelled a call by the NIH and other stakeholders to enhance the reproducibility and transparency  
7 of preclinical research.(39)

14  
15 As stated, we recognize that translation is not a linear process, but we should observe consistent  
16 and coherent patterns. Moving forward, we suggest that preclinical and clinical studies for  
17 emerging therapies should be fully reported and attention should be given to validities in order to  
18 develop more precise estimates of effect early in development. Investigators should carefully  
19 match their preclinical model to the intended clinical population; when possible, both disease states  
20 and outcomes measured should have high construct validity. Following successful exploratory  
21 preclinical studies, investigators should consider preclinical systematic reviews(40) and designing  
22 methodologically rigorous confirmatory and/or multicenter preclinical studies.(41) These steps  
23 may allow preclinical testing to more accurately forecast downstream clinical results in human  
24 patients.(30) Within the trajectory of clinical development (i.e. once clinical trials have been  
25 initiated), careful consideration of methods to reduce bias should also be considered (although,  
26 this may not be possible for the earliest phase trials). We believe these steps will provide unbiased  
27 and valuable information that will ultimately provide patients with cancer therapies that match  
28 their preclinical and early clinical promise.

## 51 CONCLUSIONS

52  
53  
54  
55  
56  
57  
58  
59  
60

1  
2  
3 The findings from our systematic review demonstrate that even successful biotherapeutics may  
4 not demonstrate a clear translational road map. The magnitude of efficacy of T-VEC demonstrated  
5 in preclinical studies was considerably larger when T-VEC was moved to the clinic, and the most  
6 methodologically rigorous trial included in our review demonstrated the smallest degree of  
7 efficacy. Methodologically rigorous studies should be performed earlier on in the translational  
8 pathway, which may help to get a realistic estimate of treatment efficacy prior to clinical  
9 translation.  
10  
11  
12  
13  
14  
15  
16  
17  
18  
19

## 20 **DECLARATIONS**

21  
22  
23 *Ethics approval:* Not applicable.

24  
25 *Consent for publication:* Not applicable.

26  
27  
28 *Availability of data:* The datasets used and/or analysed during the current study are available  
29 from the corresponding author on reasonable request.

30  
31  
32 *Competing interests:* The authors declare that they have no competing interests.

33  
34  
35 *Funding:* Biotherapeutics for Cancer Treatment (BioCanRx) supported the conduct of this study  
36 by a Catalyst grant. BioCanRx is a Government of Canada funded Networks of Centres of  
37 Excellence and was not involved in any other aspect of the project, such as the design of the  
38 project's protocol and analysis plan, the collection of data and analyses. CB was also supported  
39 by a BioCanRx studentship. ML is supported by The Ottawa Hospital Anesthesia Alternate  
40 Funds Association and the Scholarship Protected Time Program, Department of Anesthesiology  
41 and Pain Medicine, uOttawa.  
42  
43  
44  
45  
46  
47  
48  
49

50  
51 *Author contributions:* MML and DAF conceptualized the study. MML, RA, DAF, and GJL  
52 contributed to the study design. GJL, YYD, JM, and CB conducted data extraction. All authors  
53 analysed and interpreted the data. MML and GJL were responsible for drafting the manuscript.  
54  
55  
56  
57  
58  
59  
60

1  
2  
3 All authors critically reviewed the manuscript and provided intellectual content. All authors  
4  
5 approve the final version of the manuscript.  
6

7  
8 *Acknowledgments:* We thank Risa Shorr (Ottawa Hospital Research Institute librarian) for  
9  
10 systematic search assistance. MML is supported by The Ottawa Hospital Anesthesia Alternate  
11  
12 Funds Association and the Scholarship Protected Time Program, Department of Anesthesiology  
13  
14 and Pain Medicine, uOttawa.  
15  
16  
17  
18  
19  
20  
21  
22  
23  
24  
25  
26  
27  
28  
29  
30  
31  
32  
33  
34  
35  
36  
37  
38  
39  
40  
41  
42  
43  
44  
45  
46  
47  
48  
49  
50  
51  
52  
53  
54  
55  
56  
57  
58  
59  
60

## REFERENCES

1. Freedman LP, Cockburn IM, Simcoe TS. The Economics of Reproducibility in Preclinical Research. *PLoS Biol.* 2015;13(6):e1002165.
2. Contopoulos-Ioannidis DG, Ntzani E, Ioannidis JP. Translation of highly promising basic science research into clinical applications. *Am J Med.* 2003;114(6):477-84.
3. Morris ZS, Wooding S, Grant J. The answer is 17 years, what is the question: understanding time lags in translational research. *J R Soc Med.* 2011;104(12):510-20.
4. Use of Laboratory Animals in Biomedical and Behavioral Research. Washington (DC)1988.
5. Umscheid CA, Margolis DJ, Grossman CE. Key concepts of clinical trials: a narrative review. *Postgrad Med.* 2011;123(5):194-204.
6. Rehman H, Silk AW, Kane MP, Kaufman HL. Into the clinic: Talimogene laherparepvec (T-VEC), a first-in-class intratumoral oncolytic viral therapy. *J Immunother Cancer.* 2016;4:53.
7. Fergusson DA, Wesch NL, Leung GJ, MacNeil JL, Conic I, Presseau J, et al. Assessing the Completeness of Reporting in Preclinical Oncolytic Virus Therapy Studies. *Mol Ther Oncolytics.* 2019;14:179-87.
8. Moher D, Liberati A, Tetzlaff J, Altman DG, Group P. Preferred reporting items for systematic reviews and meta-analyses: the PRISMA statement. *J Clin Epidemiol.* 2009;62(10):1006-12.
9. Eisenhauer EA, Therasse P, Bogaerts J, Schwartz LH, Sargent D, Ford R, et al. New response evaluation criteria in solid tumours: revised RECIST guideline (version 1.1). *Eur J Cancer.* 2009;45(2):228-47.
10. Higgins JP, Altman DG, Gotzsche PC, Juni P, Moher D, Oxman AD, et al. The Cochrane Collaboration's tool for assessing risk of bias in randomised trials. *BMJ.* 2011;343:d5928.
11. Hooijmans CR, Rovers MM, de Vries RBM, Leenaars M, Ritskes-Hoitinga M, Langendam MW. SYRCLE's risk of bias tool for animal studies. *BMC Medical Research Methodology.* 2014;14(1):43.
12. Newcombe RG. Two-sided confidence intervals for the single proportion: comparison of seven methods. *Statistics in medicine.* 1998;17(8):857-72.
13. Andtbacka RH, Kaufman HL, Collichio F, Amatruda T, Senzer N, Chesney J, et al. Talimogene Laherparepvec Improves Durable Response Rate in Patients With Advanced Melanoma. *J Clin Oncol.* 2015;33(25):2780-8.
14. Hu JC, Coffin RS, Davis CJ, Graham NJ, Groves N, Guest PJ, et al. A phase I study of OncoVEXGM-CSF, a second-generation oncolytic herpes simplex virus expressing granulocyte macrophage colony-stimulating factor. *Clinical cancer research : an official journal of the American Association for Cancer Research.* 2006;12(22):6737-47.
15. Senzer NN, Kaufman HL, Amatruda T, Nemunaitis M, Reid T, Daniels G, et al. Phase II clinical trial of a granulocyte-macrophage colony-stimulating factor-encoding, second-



- 1  
2  
3 generation oncolytic herpesvirus in patients with unresectable metastatic melanoma. *J Clin*  
4 *Oncol.* 2009;27(34):5763-71.  
5
- 6 16. Long GV, Dummer R, Ribas A, Puzanov I, Michielin O, Vanderwalde A, et al. 24LBA  
7 Safety data from the phase 1b part of the MASTERKEY-265 study combining talimogene  
8 laherparepvec (T-VEC) and pembrolizumab for unresectable stage IIIB-IV melanoma.  
9 *European Journal of Cancer.* 2015;51:S722.  
10
- 11 17. Puzanov I, Milhem MM, Minor D, Hamid O, Li A, Chen L, et al. Talimogene  
12 Laherparepvec in Combination With Ipilimumab in Previously Untreated, Unresectable  
13 Stage IIIB-IV Melanoma. *J Clin Oncol.* 2016;34(22):2619-26.  
14
- 15 18. Harrington KJ, Hingorani M, Tanay MA, Hickey J, Bhide SA, Clarke PM, et al. Phase I/II  
16 study of oncolytic HSV GM-CSF in combination with radiotherapy and cisplatin in  
17 untreated stage III/IV squamous cell cancer of the head and neck. *Clinical cancer research :  
18 an official journal of the American Association for Cancer Research.* 2010;16(15):4005-15.  
19
- 20 19. Chang KJ, Senzer NN, Binmoeller K, Goldsweig H, Coffin R. Phase I dose-escalation study  
21 of talimogene laherparepvec (T-VEC) for advanced pancreatic cancer (ca). *Journal of  
22 Clinical Oncology.* 2012;30(15\_suppl):e14546-e.  
23
- 24 20. Liu BL, Robinson M, Han ZQ, Branston RH, English C, Reay P, et al. ICP34.5 deleted  
25 herpes simplex virus with enhanced oncolytic, immune stimulating, and anti-tumour  
26 properties. *Gene Ther.* 2003;10(4):292-303.  
27
- 28 21. Piasecki J, Tiep L, Zhou J, Beers C. Talimogene laherparepvec generates systemic T-cell-  
29 mediated anti-tumor immunity. *Journal for ImmunoTherapy of Cancer.* 2013;1(1):P198.  
30
- 31 22. Cooke K, Rottman J, Zhan J, Mitchell P, Ikotun O, Yerby B, et al. Oncovex MGM-CSF –  
32 mediated regression of contralateral (non-injected) tumors in the A20 murine lymphoma  
33 model does not involve direct viral oncolysis. *Journal for Immunotherapy of Cancer.*  
34 2015;3(Suppl 2):P336-P.  
35
- 36 23. Piasecki J, le T, Ponce R, Beers C. Abstract 258: Talimogene laherparepvec increases the  
37 anti-tumor efficacy of the anti-PD-1 immune checkpoint blockade. *Cancer Research.*  
38 2015;75(15 Supplement):258-.  
39
- 40 24. Cooke K, Estrada J, Zhan J, Mitchell P, Bulliard Y, Beltran PJ. Abstract 2351: Development  
41 of a B16F10 cell line expressing mNectin1 to study the activity of OncoVEXmGM-CSF in  
42 murine syngeneic melanoma models. *Cancer Research.* 2016;76(14 Supplement):2351-.  
43
- 44 25. Louie RJ, Perez MC, Jajja MR, Sun J, Collichio F, Delman KA, et al. Real-World Outcomes  
45 of Talimogene Laherparepvec Therapy: A Multi-Institutional Experience. *J Am Coll Surg.*  
46 2019;228(4):644-9.  
47
- 48 26. National Comprehensive Cancer Center. Guidelines for Patients: Melanoma2018.  
49
- 50 27. US Food and Drug Administration. IMLYGIC (talimogene laherparepvec) 2015 [Available  
51 from: [https://www.fda.gov/vaccines-blood-biologics/cellular-gene-therapy-  
52 products/imlygic-talimogene-laherparepvec](https://www.fda.gov/vaccines-blood-biologics/cellular-gene-therapy-products/imlygic-talimogene-laherparepvec).  
53
- 54 28. European Medicines Agency. Assessment report Imlygic International non-proprietary  
55 name: talimogene laherparepvec 2015 [Available from:  
56  
57  
58  
59  
60

[https://www.ema.europa.eu/en/documents/assessment-report/imlygic-epar-public-assessment-report\\_en.pdf](https://www.ema.europa.eu/en/documents/assessment-report/imlygic-epar-public-assessment-report_en.pdf).

29. Hirst JA, Howick J, Aronson JK, Roberts N, Perera R, Koshiaris C, et al. The need for randomization in animal trials: an overview of systematic reviews. *PLoS One*. 2014;9(6):e98856.
30. Macleod MR, van der Worp HB, Sena ES, Howells DW, Dirnagl U, Donnan GA. Evidence for the efficacy of NXY-059 in experimental focal cerebral ischaemia is confounded by study quality. *Stroke*. 2008;39(10):2824-9.
31. Landis SC, Amara SG, Asadullah K, Austin CP, Blumenstein R, Bradley EW, et al. A call for transparent reporting to optimize the predictive value of preclinical research. *Nature*. 2012;490(7419):187-91.
32. Zarin DA, Tse T. Sharing Individual Participant Data (IPD) within the Context of the Trial Reporting System (TRS). *PLoS Med*. 2016;13(1):e1001946.
33. Hodkinson A, Kirkham JJ, Tudur-Smith C, Gamble C. Reporting of harms data in RCTs: a systematic review of empirical assessments against the CONSORT harms extension. *BMJ Open*. 2013;3(9):e003436.
34. Rodgers MA, Brown JV, Heirs MK, Higgins JP, Mannion RJ, Simmonds MC, et al. Reporting of industry funded study outcome data: comparison of confidential and published data on the safety and effectiveness of rhBMP-2 for spinal fusion. *BMJ*. 2013;346:f3981.
35. Jureidini JN, McHenry LB, Mansfield PR. Clinical trials and drug promotion: selective reporting of study 329. *International Journal of Risk & Safety in Medicine*. 2008;20(1-2):73-81.
36. Ioannidis JP, Lau J. Improving safety reporting from randomised trials. *Drug Saf*. 2002;25(2):77-84.
37. Lineberry N, Berlin JA, Mansi B, Glasser S, Berkwits M, Klem C, et al. Recommendations to improve adverse event reporting in clinical trial publications: a joint pharmaceutical industry/journal editor perspective. *BMJ*. 2016;355:i5078.
38. Begley CG, Ellis LM. Drug development: Raise standards for preclinical cancer research. *Nature*. 2012;483(7391):531-3.
39. Collins FS, Tabak LA. Policy: NIH plans to enhance reproducibility. *Nature*. 2014;505(7485):612-3.
40. Lalu MM, Sullivan KJ, Mei SH, Moher D, Straus A, Fergusson DA, et al. Evaluating mesenchymal stem cell therapy for sepsis with preclinical meta-analyses prior to initiating a first-in-human trial. *Elife*. 2016;5.
41. Llovera G, Hofmann K, Roth S, Salas-Perdomo A, Ferrer-Ferrer M, Perego C, et al. Results of a preclinical randomized controlled multicenter trial (pRCT): Anti-CD49d treatment for acute brain ischemia. *Science translational medicine*. 2015;7(299):299ra121.

1  
2  
3  
4  
5  
6  
7  
8  
9  
10  
11  
12  
13  
14  
15  
16  
17  
18  
19  
20  
21  
22  
23  
24  
25  
26  
27  
28  
29  
30  
31  
32  
33  
34  
35  
36  
37  
38  
39  
40  
41  
42  
43  
44  
45  
46  
47  
48  
49  
50  
51  
52  
53  
54  
55  
56  
57  
58  
59  
60

For peer review only

## Figure Legends

### Figure 1. Study selection flow diagram

**Figure 2. Preclinical and clinical efficacy of T-VEC.** Four preclinical studies using mice demonstrated efficacy rates of 20-100% and clinical studies (3 melanoma and 2 mixed malignancy studies) demonstrated efficacy rates from 0-23.5%. Non-melanoma/mixed studies are represented by blue bars whereas melanoma studies are represented by orange bars. Where possible, complete regression rates of contralateral tumors for mice were used in preclinical studies and complete response was used for clinical studies. Efficacy rates decrease in the preclinical to clinical translation and upon more rigorous study design in later phase clinical trials. If possible, error bars are plotted and represent 95% confidence intervals. Some studies were not included in this analysis due to no reporting of outcome for CR.

**Table 1A.** Study characteristics of included preclinical studies of T-VEC.

| Preclinical Study              | Treatment                         | Total Number of Animals Used | Type of Cancer/Model                           | Efficacy Measures*                                                                         | Risk of Bias (9**) |
|--------------------------------|-----------------------------------|------------------------------|------------------------------------------------|--------------------------------------------------------------------------------------------|--------------------|
| Liu, 2003 <sup>(20)</sup>      | T-VEC; HSV1 wildtype immunization | 90                           | Lymphoma (A20 murine lymphoma mouse model)     | CR: 100% (n=10) (injected)                                                                 | 9                  |
| Piasecki, 2013 <sup>(21)</sup> | T-VEC                             | NR                           | Lymphoma (A20 murine lymphoma mouse model)     | CR: 70-100% of injected, 50-60% of contralateral                                           | 9                  |
| Piasecki, 2015 <sup>(23)</sup> | T-VEC + Anti-PD-1                 | NR                           | Colorectal (MC-38 colon carcinoma mouse model) | CR: 80.0% (44.2-96.5%) (injected)<br>n=10<br>CR: 20.0% (3.5-55.8%) (contralateral)<br>n=10 | 9                  |
| Cooke, 2015 <sup>(22)</sup>    | T-VEC                             | 40                           | Lymphoma (A20 murine lymphoma mouse model)     | CR: 100% (65.5-100%) (injected)<br>n=10<br>CR: 50% (23.7-76.3%) (contralateral)            | 9                  |
| Cooke, 2016 <sup>(24)</sup>    | T-VEC                             | 20                           | Melanoma (B16F10 melanoma model)               | NR – statistically significant tumor reduction and survival noted.                         | 9                  |

**Table 2B.** Study characteristics of included clinical studies of T-VEC.

| Clinical Study                                                 | Treatment             | Total N         | Type of Cancer                              | Efficacy Measures*                                                                                  | Risk of Bias (/9**) |
|----------------------------------------------------------------|-----------------------|-----------------|---------------------------------------------|-----------------------------------------------------------------------------------------------------|---------------------|
| Hu, 2006 <sup>(14)</sup><br><i>Non-controlled Phase I</i>      | T-VEC                 | 30 (9 melanoma) | Breast, colorectal, melanoma, head and neck | CR: 0% (0-14.1%)<br>PR: 0% (0-14.1%)                                                                | 7                   |
| Senzer, 2009 <sup>(15)</sup><br><i>Non-controlled Phase II</i> | T-VEC                 | 50              | Melanoma                                    | OR: 26.0% (15.1-40.6%)<br>CR: 20.0% (10.5-34.1%)<br>PR: 10.0% (3.7-22.6%)                           | 7                   |
| Harrington, 2010 <sup>(18)</sup><br><i>Phase I/II</i>          | T-VEC + cisplatin     | 17              | Head and neck                               | CR: 23.5% (7.8-50.2%)<br>PR: 58.8% (33.5-80.6%)<br>OR: 82.4% (55.8-95.3%)                           | 6                   |
| Chang, 2012 <sup>(19)</sup><br><i>Phase I</i>                  | T-VEC                 | 17              | Pancreatic                                  | OR: 0% (0-22.9%)                                                                                    | 6                   |
| Andtbacka, 2015 <sup>(13)</sup><br><i>Phase III</i>            | T-VEC                 | 295             | Melanoma                                    | DR: 16.3% (12.1-20.5%)<br>OR: 26.4% (21.4-31.5%)<br>PR: 15.6% (11.7-20.3%)<br>CR: 10.8% (7.6-15.1%) | 3                   |
|                                                                | GM-CSF (control)      | 141             |                                             | DR: 2.1% (0-4.5%)<br>OR: 5.7% (1.9-9.5%)<br>PR: 5.0% (1.3-8.5%)<br>CR: < 1%                         |                     |
| Long, 2015 <sup>(16)</sup><br><i>Phase Ib</i>                  | T-VEC + pembrolizumab | 21              | Melanoma                                    | -                                                                                                   | 6                   |
| Puzanov, 2016 <sup>(17)</sup><br><i>Phase Ib</i>               | T-VEC + IPI           | 18              | Melanoma                                    | DR: 44.4% (22.4-68.7%)<br>OR: 50.0% (29.0-70.9%)<br>CR: 22.2% (7.4-48.1%)<br>PR: 27.8% (10.7-53.6%) | 6                   |

\* DR – durable response; OR – objective response; CR – complete response/complete regression; PR – partial response; DR/OR/CR/PR definitions were based on RECIST guidelines for clinical studies. \*\*Total number of domains that were assessed a score of high risk or unclear (maximum = 9). The nine domains include randomization, allocation concealment, blinding of participants/personnel, outcome assessment blinding, incomplete outcome reporting, selective outcome reporting, reported conflicts of interest, sample size calculation, funding.

1  
2  
3  
4  
5  
6  
7  
8  
9  
10  
11  
12  
13  
14  
15  
16  
17  
18  
19  
20  
21  
22  
23  
24  
25  
26  
27  
28  
29  
30  
31  
32  
33  
34  
35  
36  
37  
38  
39  
40  
41  
42  
43  
44  
45  
46  
47

**Table 3.** Construct validity assessment for preclinical studies

| <b>Author, Year</b> | <b>Adult Used</b> | <b>Animals with Advanced Stage Disease</b> | <b>Animals Immune to HSV</b> | <b>Xenograft Model Used</b> | <b>Used Model with a Humanized Immune System</b> |
|---------------------|-------------------|--------------------------------------------|------------------------------|-----------------------------|--------------------------------------------------|
| Cooke, 2016         | Unclear           | No                                         | Unclear                      | No                          | Unclear                                          |
| Cooke, 2015         | Unclear           | No                                         | Unclear                      | No                          | Unclear                                          |
| Piasecki, 2015      | Unclear           | Unclear                                    | Unclear                      | No                          | Unclear                                          |
| Piasecki, 2013      | Unclear           | Unclear                                    | Unclear                      | No                          | Unclear                                          |
| Liu, 2003           | Unclear           | No                                         | Yes                          | No                          | Unclear                                          |

er review only

**Table 4.** Risk of bias assessment for preclinical studies

| <b>Author,<br/>Year</b> | <b>Random<br/>Sequence<br/>Generation</b> | <b>Allocation<br/>Concealment</b> | <b>Blinding of<br/>Personnel</b> | <b>Blinded<br/>Outcome<br/>Assessment</b> | <b>Incomplete<br/>Outcomes<br/>Addressed</b> | <b>Selective<br/>Outcome<br/>Reporting</b> | <b>Conflicts<br/>of Interest</b> | <b>A Priori<br/>Sample<br/>Size<br/>Calculation</b> | <b>Funding</b> |
|-------------------------|-------------------------------------------|-----------------------------------|----------------------------------|-------------------------------------------|----------------------------------------------|--------------------------------------------|----------------------------------|-----------------------------------------------------|----------------|
| Cooke,<br>2016          | High Risk                                 | High Risk                         | Unclear                          | Unclear                                   | High Risk                                    | High Risk                                  | Unclear                          | Unclear                                             | High Risk      |
| Cooke,<br>2015          | High Risk                                 | High Risk                         | Unclear                          | Unclear                                   | High Risk                                    | High Risk                                  | Unclear                          | Unclear                                             | High Risk      |
| Piasecki,<br>2015       | Unclear                                   | Unclear                           | Unclear                          | Unclear                                   | High Risk                                    | High Risk                                  | Unclear                          | Unclear                                             | High Risk      |
| Piasecki,<br>2013       | Unclear                                   | Unclear                           | Unclear                          | Unclear                                   | High Risk                                    | High Risk                                  | Unclear                          | Unclear                                             | High Risk      |
| Liu, 2003               | Unclear                                   | Unclear                           | Unclear                          | Unclear                                   | High Risk                                    | Unclear                                    | Unclear                          | Unclear                                             | High Risk      |



Table 5. Risk of bias assessment for clinical studies

| Author, Year     | Random Sequence Generation | Allocation Concealment | Blinding of Participants and Personnel | Blinding of Outcome Assessors | Incomplete Outcome Data Addressed | Selective Reporting | Conflicts of Interest | Funding   | Sample Size Calculation |
|------------------|----------------------------|------------------------|----------------------------------------|-------------------------------|-----------------------------------|---------------------|-----------------------|-----------|-------------------------|
| Andtbacka, 2015  | Low Risk                   | Low Risk               | High Risk                              | Low Risk                      | Low Risk                          | Low Risk            | High Risk             | High Risk | Low Risk                |
| Long, 2015       | High Risk                  | N/A                    | High Risk                              | Unclear                       | Low Risk                          | Low Risk            | High Risk             | High Risk | Unclear                 |
| Puzanov, 2016    | High Risk                  | N/A                    | High Risk                              | Unclear                       | Low Risk                          | Low Risk            | High Risk             | High Risk | Unclear                 |
| Chang, 2012      | High Risk                  | N/A                    | High Risk                              | Unclear                       | Low Risk                          | Low Risk            | High Risk             | High Risk | Unclear                 |
| Harrington, 2010 | High Risk                  | N/A                    | Unclear                                | High Risk                     | Low Risk                          | Low Risk            | High Risk             | High Risk | Unclear                 |
| Senzer, 2009     | High Risk                  | N/A                    | High Risk                              | Unclear                       | Low Risk                          | High Risk           | High Risk             | High Risk | Unclear                 |
| Hu, 2006         | High Risk                  | N/A                    | Unclear                                | Unclear                       | Low Risk                          | Unclear             | High Risk             | High Risk | Unclear                 |

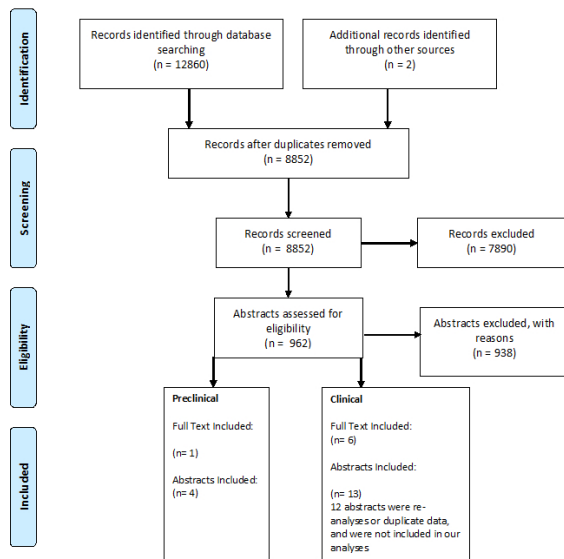

Figure 1. Study selection flow diagram

304x209mm (96 x 96 DPI)

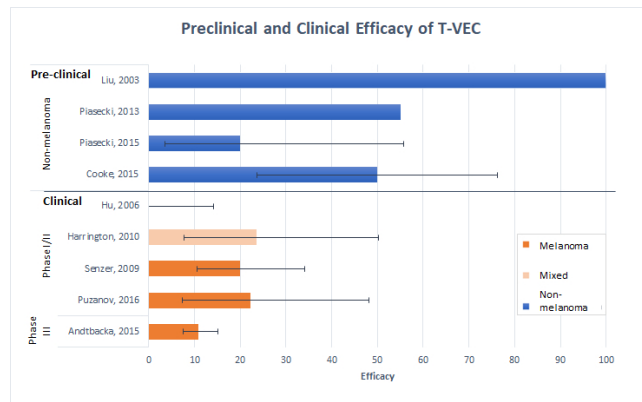

Figure 2. Preclinical and clinical efficacy of T-VEC. Four preclinical studies using mice demonstrated efficacy rates of 20-100% and clinical studies (3 melanoma and 2 mixed malignancy studies) demonstrated efficacy rates from 0-23.5%. Non-melanoma/mixed studies are represented by blue bars whereas melanoma studies are represented by orange bars. Where possible, complete regression rates of contralateral tumors for mice were used in preclinical studies and complete response was used for clinical studies. Efficacy rates decrease in the preclinical to clinical translation and upon more rigorous study design in later phase clinical trials. If possible, error bars are plotted and represent 95% confidence intervals. Some studies were not included in this analysis due to no reporting of outcome for CR.

304x209mm (96 x 96 DPI)

### Online Supplementary File 1: Search Strategy

Database: Ovid MEDLINE(R) In-Process & Other Non-Indexed Citations and Ovid MEDLINE(R) <1946 to Present>

Search Strategy:

-----

- 1 Talimogen\* laherparepvec.mp. (28)
- 2 t vec.mp. (24)
- 3 OncoVEX\*.mp. (15)
- 4 Imlygic.mp. (2)
- 5 JS1 34\*.tw. (5)
- 6 or/1-5 (51)
- 7 Oncolytic Virotherapy/ or Oncolytic Viruses/ or cancer vaccines/tu (7016)
- 8 (cancer adj2 (vaccine\* or virus\* or virotherap\* or viral therap\*)).tw. (5206)
- 9 exp neoplasms/ or cancer.tw. (3097511)
- 10 or/7-9 (3097684)
- 11 simplexvirus/ or herpesvirus 1, human/ or Herpes Simplex/ (32955)
- 12 (hsv1 or hsv or herpesvirus or Herpes).tw. (72684)
- 13 11 or 12 (77360)
- 14 10 and 13 (12929)
- 15 ((oncolyt\* or cancer or tumor or tumour) adj3 (hsv1 or hsv or hsv or herpesvirus or Herpes)).tw. (846)
- 16 (oncolyt\* adj3 (virotherap\* or virus\* or viral therap\*)).tw. (2183)
- 17 or/14-16 (14671)
- 18 exp animal experimentation/ or exp models, animal/ or animals/ or mammals/ or vertebrates/ or exp fishes/ or exp amphibia/ or exp reptiles/ or exp birds/ or exp hyraxes/ or exp marsupialia/ or exp monotremata/ or exp scandentia/ or exp chiroptera/ or exp carnivora/ or exp cetacea/ or exp Xenarthra/ or exp elephants/ or exp insectivora/ or exp lagomorpha/ or exp rodentia/ or exp sirenia/ or exp Perissodactyla/ or primates/ or exp strepsirhini/ or haplorhini/ or exp tarsii/ or exp platyrrhini/ or catarrhini/ or exp cercopithecidae/ or gorilla gorilla/ or pan paniscus/ or pan troglodytes/ or exp pongo/ or exp hylobatidae/ or hominidae/ (5893175)
- 19 (animal\$1 or chordata or vertebrate\* or fish\$2 or amphibian\* or amphibium\* or reptile\$1 or bird\$1 or mammal\* or dog or dogs or canine\$1 or cat or cats or hyrax\* or marsupial\* or monotrem\* or scandentia or bat or bats or carnivor\* or cetacea or edentata\* or elephant\* or insect or insects or insectivore or lagomorph\* or rodent\$2 or mouse or mice or murine or murinae or muridae or rat or rats or pig or pigs or piglet\$1 or swine or rabbit\$1 or sheep\$1 or goat\$1 or horse\$1 or equus or cow or cows or cattle or calf or calves or bovine or sirenia or ungulate\$1 or primate\$1 or prosimian\* or haplorhini\* or tarsiiiform\* or simian\* or platyrrhini or catarrhini or cercopithecidae or ape or apes or hylobatidae or hominid\* or chimpanzee\* or gorilla\* or orangutan\* or monkey or monkeys or ape or apes).tw. (4149175)
- 20 (preclinic\$ or pre clinic\$).tw. (72274)
- 21 or/18-20 (6474971)
- 22 17 and 21 (6511)
- 23 6 or 22 (6545)

Online Supplementary File 2. Preclinical Study Characteristics

| Author, Year   | Year Study Conducted | Country | Study Design                   | Species | Strain  | Model                             | Type of Cancer | Baseline Tumor Size | Gender | Mean Age | Mean Weight | Co-Interventions            | Duration of Follow Up |
|----------------|----------------------|---------|--------------------------------|---------|---------|-----------------------------------|----------------|---------------------|--------|----------|-------------|-----------------------------|-----------------------|
| Cooke, 2015    | ---                  | USA     | Interventional; Non-Controlled | Mouse   | Balb/c  | A20 Murine Lymphoma               | Lymphoma       | 150 mm <sup>3</sup> | Female | ---      | ---         | N/A                         | ---                   |
| Piasecki, 2015 | ---                  | ---     | Controlled Comparison          | Mouse   | C57Bl/6 | Syngeneic MC-38 Colon Carcinoma   | Colon Cancer   | ---                 | ---    | ---      | ---         | Anti-PD-1                   | ---                   |
| Piasecki, 2013 | ---                  | ---     | Controlled Comparison          | Mouse   | ---     | A20 Syngeneic Contralateral Model | Lymphoma       | ---                 | ---    | ---      | ---         | N/A                         | 10 days               |
| Liu, 2003      | 2002                 | UK      | Controlled Comparison          | Mouse   | Balb/c  | Syngeneic A20 Lymphoma            | Lymphoma       | 0.5 cm diameter     | ---    | ---      | ---         | Immunization wild type HSV1 | 35 days               |

---: not reported  
N/A: not applicable  
Cooke, 2016 did not provide any relevant information

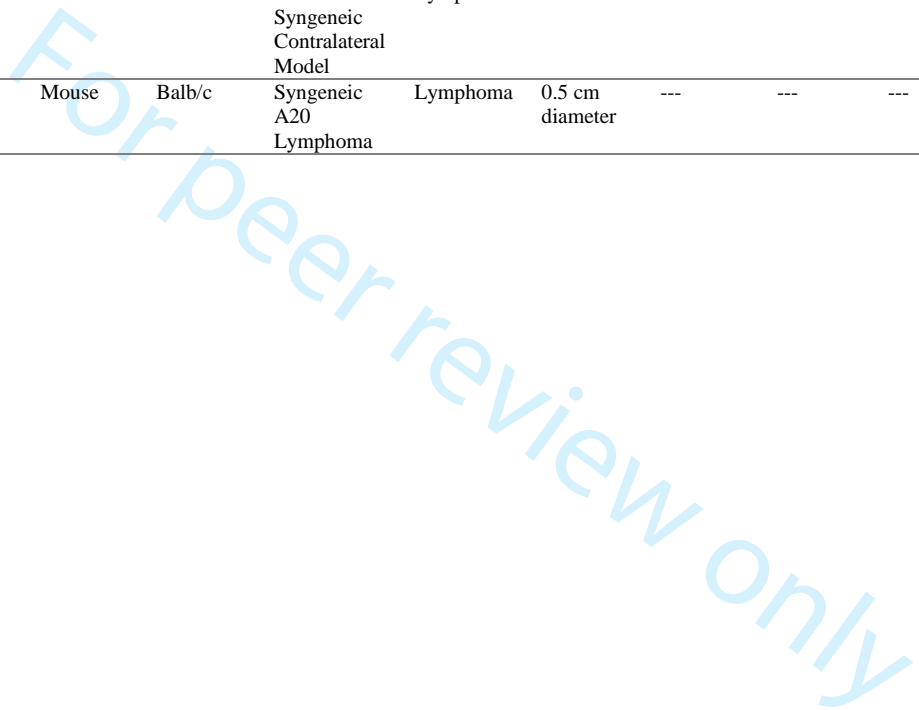

1  
2  
3  
4  
5  
6  
7  
8  
9  
10  
11  
12  
13  
14  
15  
16  
17  
18  
19  
20  
21  
22  
23  
24  
25  
26  
27  
28  
29  
30  
31  
32  
33  
34  
35  
36  
37  
38  
39  
40  
41  
42  
43  
44  
45  
46  
47

Online Supplementary File 3. Preclinical Intervention and Comparator Characteristics

| Author, Year   | Experiment | Group                           | N   | Dose 1                        | Frequency Dose 1 | Duration Dose 1               | Dose 2          | Frequency Dose 2 | Duration Dose 2 | Dose 3 | Frequency Dose 3 | Duration Dose 3 |
|----------------|------------|---------------------------------|-----|-------------------------------|------------------|-------------------------------|-----------------|------------------|-----------------|--------|------------------|-----------------|
| Cooke, 2015    | 1          | Cohort 1: TVEC                  | 10  | 3x10 <sup>4</sup> PFU         | ---              | ---                           | N/A             | N/A              | N/A             | N/A    | N/A              | N/A             |
|                |            | Cohort 2:                       | 10  | ---                           | ---              | ---                           | N/A             | N/A              | N/A             | N/A    | N/A              | N/A             |
|                |            | Cohort 3: TVEC                  | 10  | 3x10 <sup>6</sup> PFU         | Every 3 days     | 1 week                        | N/A             | N/A              | N/A             | N/A    | N/A              | N/A             |
|                |            | Cohort 4:                       | 10  | ---                           | ---              | ---                           | N/A             | N/A              | N/A             | N/A    | N/A              | N/A             |
| Piasecki, 2015 | 1          | Int: OncoVEXmuGM-CSF + Anti-PD1 | --- | T-VEC: ---                    | Every 3 days     | 3 doses                       | Anti-PD-1: ---  | Twice per wk     | ---             | N/A    | N/A              | N/A             |
|                |            | Int: OncoVEXmuGM-CSF            | --- | T-VEC: ---                    | ---              | ---                           | ---             | ---              | ---             | ---    | ---              | ---             |
|                |            | Con: Anti-PD-1                  | --- | Anti-PD-1: ---                | ---              | ---                           | ---             | ---              | ---             | ---    | ---              | ---             |
| Piasecki, 2013 | 1          | Int: T-VEC                      | --- | 5x10 <sup>6</sup> PFU         | single           | single                        | N/A             | N/A              | N/A             | N/A    | N/A              | N/A             |
|                |            | Con: Vehicle                    | --- | ---                           | single           | single                        | N/A             | N/A              | N/A             | N/A    | N/A              | N/A             |
| Liu, 2003      | 1          | Int: JS1/34.5-/47-/mGM-CSF      | 10  | 10 <sup>6</sup> PFU/ml (50µl) | Every other day  | 3 doses – 5 days              | N/A             | N/A              | N/A             | N/A    | N/A              | N/A             |
|                |            |                                 | 10  | 10 <sup>7</sup> PFU/ml (50µl) | Every other day  | 3 doses – 5 days              | N/A             | N/A              | N/A             | N/A    | N/A              | N/A             |
|                |            |                                 | 10  | 10 <sup>8</sup> PFU/ml (50µl) | Every other day  | 3 doses – 5 days              | N/A             | N/A              | N/A             | N/A    | N/A              | N/A             |
|                |            | Int: JS1/34.5-/47-              | 10  | 10 <sup>6</sup> PFU/ml (50µl) | Every other day  | 3 doses – 5 days              | N/A             | N/A              | N/A             | N/A    | N/A              | N/A             |
|                |            |                                 | 10  | 10 <sup>7</sup> PFU/ml (50µl) | Every other day  | 3 doses – 5 days              | N/A             | N/A              | N/A             | N/A    | N/A              | N/A             |
|                |            |                                 | 10  | 10 <sup>8</sup> PFU/ml (50µl) | Every other day  | 3 doses – 5 days              | N/A             | N/A              | N/A             | N/A    | N/A              | N/A             |
|                |            | Con: vehicle                    | 10  | 50µl                          | Every other day  | 3 doses – 5 days              | N/A             | N/A              | N/A             | N/A    | N/A              | N/A             |
|                |            |                                 | 2   | Int: JS1/34.5-/47-/mGM-CSF    | 10               | 10 <sup>8</sup> PFU/ml (50µl) | Every other day | 3 doses – 5 days | N/A             | N/A    | N/A              | N/A             |
|                |            | Con: Vehicle                    | 10  | 50µl                          | Every other day  | 3 doses – 5 days              | N/A             | N/A              | N/A             | N/A    | N/A              |                 |

All doses of T-VEC were given by injection intratumorally

---: not reported

Int: intervention; Con: control; wk: week; PFU: plaque forming units

Cooke, 2016 did not provide any relevant information

Online Supplementary File 4. Clinical Study Characteristics

| Author, Year     | Country                            | Year Study Conducted | Study Type                                       | Type of Cancer                               | Primary Outcomes                                                                                   | Secondary Outcomes                                                                                           |
|------------------|------------------------------------|----------------------|--------------------------------------------------|----------------------------------------------|----------------------------------------------------------------------------------------------------|--------------------------------------------------------------------------------------------------------------|
| Andtbacka, 2015  | USA, UK, Canada and South Africa   | 2009-2014            | Interventional; Randomized (OPTiM Trial)         | Melanoma                                     | Efficacy: DRR                                                                                      | Efficacy: ORR<br>OS<br>Best Overall Response<br>Onset and duration of response<br>Time to treatment failure  |
| Long 2015        | USA, Australia, Switzerland, Spain | 2014-2022            | Interventional: Non-randomized, No control       | Melanoma                                     | Safety: Dose Limiting Toxicities                                                                   | Efficacy: DRR<br>OS<br>Progression Free Survival<br>Safety: AEs                                              |
| Puzanov, 2015    | USA                                | 2013-2014            | Interventional: Non-Randomized                   | Melanoma                                     | Safety: Dose Limiting Toxicities                                                                   | Efficacy: ORR<br>Safety: Grade ≥3 AEs                                                                        |
| Chang, 2012      | USA                                | 2006-2008            | Interventional: Non-randomized, No control       | Pancreatic Cancer                            | Efficacy: Detection of T-VEC in blood and urine<br>Presence of Anti-HSV1 Antibodies<br>Safety: AEs | Efficacy: ORR<br>Change in sum of longest tumor diameter<br>Change in pain intensity                         |
| Harrington, 2010 | UK                                 | 2005-2010            | Interventional: Non-randomized, No control       | Squamous Cell Carcinoma of the head and neck | Safety: AEs                                                                                        | Efficacy: Antitumor Activity<br>OS*<br>Complete Response*<br>Partial Response*<br>Progression Free Survival* |
| Senzer 2009      | USA                                | 2005-2008            | Interventional; (non-controlled, non randomized) | Melanoma                                     | Efficacy: ORR                                                                                      | Efficacy: OS<br>Safety: AEs                                                                                  |
| Hu, 2006         | USA, UK                            | ---                  | Interventional: Non-randomized, No control       | Breast, Colorectal, Melanoma, Head and Neck  | Efficacy: Biodistribution<br>Safety: AEs                                                           | Efficacy: GM-CSF expression<br>HSV antigen associated necrosis<br>Viral Replication<br>Local Reactions       |

---: Not Reported

\*: not reported a priori

AEs - adverse events; CHN- cutaneous head and neck; DRR – durable response rate; ECOG – Eastern Cooperative Oncology Group; ORR- objective response rate; OS – overall survival

**Online Supplementary File 5. Clinical Patient Characteristics**

| Author, Year     | Group                        | Patients (N) | Median Age (range) | Sex (n; F) | Metastasis Stage (n; Stage IVM1b/c) | Line of Therapy (n; first line) | HSV Serostatus (n; Seropositive, n; unknown) |
|------------------|------------------------------|--------------|--------------------|------------|-------------------------------------|---------------------------------|----------------------------------------------|
| Andtbacka, 2015  | T-VEC                        | 295          | 63 (22-94)         | 122        | 131                                 | 138                             | 175, 23                                      |
| Long, 2015       | T-VEC + Pembrolizumab        | 21           | 58                 | 13         | 11                                  | ---                             | ---                                          |
| Puzanov, 2015    | T-VEC + Ipilimumab           | 18           | ---                | ---        | ---                                 | 18                              | ---                                          |
| Chang, 2012      | T-VEC                        | 17           | 54                 | 6          | ---                                 | ---                             | ---                                          |
| Harrington, 2010 | T-VEC and Chemo radiotherapy | 17           | 58 (41-74)         | 2          | 3                                   | ---                             | ---                                          |
| Senzer, 2009     | T-VEC                        | 50           | 62 (34-88)         | 28         | 24                                  | 0                               | 36, 1                                        |
| Hu, 2006         | T-VEC                        | 30           | 55 (30-80)         | 23         | ---                                 | 0                               | 19                                           |

--- : Not Reported

For peer review only



## Online Supplementary File 6. Clinical Intervention and Comparator Characteristics

| Author, Year     | Arm                 | Dose 1                              | Time of Dose 1 | Frequency of Dose 1         | Dose 2                              | Time of Dose 2 | Frequency of Dose 2 | Dose 3                          | Time of Dose 3 | Frequency of Dose 3 | Intervention Window                        | Follow Up Duration         |
|------------------|---------------------|-------------------------------------|----------------|-----------------------------|-------------------------------------|----------------|---------------------|---------------------------------|----------------|---------------------|--------------------------------------------|----------------------------|
| Andtbacka, 2015  | T-VEC               | 10 <sup>6</sup> PFU/ml (≤4ml)       | Week 1         | single                      | 10 <sup>8</sup> PFU/ml (≤4ml)       | Week 4         | Q2W                 | N/A                             | N/A            | N/A                 | Median: 23 wks (0.1-79 wks)                | Median: 44 mo (32-58 mo)   |
|                  | GM-CSF              | 125 µg/m <sup>2</sup>               | Week 1         | Once daily 14/28 day cycles | N/A                                 | N/A            | N/A                 | N/A                             | N/A            | N/A                 | Median: 10 wks (0.6 to 72 wks)             | ---                        |
| Long, 2015       | T-VEC + Pemb.       | TVEC: 10 <sup>6</sup> PFU/ml        | Day 1          | single                      | T-VEC: 10 <sup>8</sup> PFU/ml       | Day 22         | Q2W                 | Pemb: 200 mg                    | Day 36         | Q2W                 | Median TVEC: 13 wks<br>Median Pemb: 10 wks | ---                        |
| Puzanov, 2015    | T-VEC + Ipilimumab  | TVEC: 10 <sup>6</sup> PFU/ml (≤4ml) | Week 1         | single                      | TVEC: 10 <sup>8</sup> PFU/ml (≤4ml) | Week 4         | Q2W                 | Ipilimumab: 3mg/kg              | Week 6         | Q3W                 | TVEC: until DLT<br>Ipi: 12 wks             | 17 mo minimum              |
| Chang, 2012      | Cohort 1            | 10 <sup>4</sup> PFU/ml              | Week 1*        | single                      | 10 <sup>5</sup> PFU/ml              | Week 4*        | Q3W*                | N/A                             | N/A            | N/A                 | up to 15 wks                               | ---                        |
|                  | Cohort 2            | 10 <sup>5</sup> PFU/ml              | Week 1         | single                      | 10 <sup>6</sup> PFU/ml              | Week 4         | Q3W                 | N/A                             | N/A            | N/A                 | up to 15 wks                               | ---                        |
|                  | Cohort 3            | 10 <sup>6</sup> PFU/ml              | Week 1         | single                      | 10 <sup>7</sup> PFU/ml              | Week 4         | Q3W                 | N/A                             | N/A            | N/A                 | up to 15 wks                               | ---                        |
| Harrington, 2010 | Cohort 1            | T-VEC: 10 <sup>6</sup> PFU/ml       | Day 1          | Q3W                         | Cisplatin: 100mg/m <sup>2</sup>     | Day 1          | Q3W                 | N/A                             | N/A            | N/A                 | Up to 9 weeks                              | Median: 29mo (19-40mo)     |
|                  | Cohort 2            | T-VEC: 10 <sup>6</sup> PFU/ml       | Day 1          | single                      | T-VEC: 10 <sup>7</sup> PFU/ml       | Day 22         | Q3W                 | Cisplatin: 100mg/m <sup>2</sup> | Day 1          | Q3W                 | Up to 9 weeks                              | Median: 29mo (19-40mo)     |
|                  | Cohort 3            | T-VEC: 10 <sup>6</sup> PFU/ml       | Day 1          | single                      | T-VEC: 10 <sup>8</sup> PFU/ml       | Day 22         | Q3W                 | Cisplatin: 100mg/m <sup>2</sup> | Day 1          | Q3W                 | Up to 9 weeks                              | Median: 29mo (19-40mo)     |
|                  | Cohort 4            | T-VEC: 10 <sup>6</sup> PFU/ml       | Day 1          | single                      | T-VEC: 10 <sup>8</sup> PFU/ml       | Day 22         | Q3W                 | Cisplatin: 100mg/m <sup>2</sup> | Day 1          | Q3W                 | Up to 9 weeks                              | Median: 29mo (19-40mo)     |
| Senzer, 2009     | T-VEC               | 10 <sup>6</sup> PFU/ml (≤4ml)       | Week 1         | Single                      | 10 <sup>8</sup> PFU/ml (≤4ml)       | Week 4         | Q2W                 | N/A                             | N/A            | N/A                 | Max: 48 wks<br>Median: 11 wks              | Median: 18 mo (11-36 mo)   |
| Hu, 2006         | Single Dose Group 1 | 10 <sup>6</sup> PFU/ml              | ---            | single                      | N/A                                 | N/A            | N/A                 | N/A                             | N/A            | N/A                 | Single dose                                | 6 wks                      |
|                  | Single Dose Group 2 | 10 <sup>7</sup> PFU/ml              | ---            | single                      | N/A                                 | N/A            | N/A                 | N/A                             | N/A            | N/A                 | Single dose                                | 6 wks                      |
|                  | Single Dose Group 3 | 10 <sup>8</sup> PFU/ml              | ---            | single                      | N/A                                 | N/A            | N/A                 | N/A                             | N/A            | N/A                 | Single dose                                | 6 wks                      |
|                  | Multi-dose Group 1  | 10 <sup>6</sup> PFU/ml              | ---            | single                      | 10 <sup>7</sup> PFU/ml              | ---            | Q1-3W               | N/A                             | N/A            | N/A                 | 3-9 wks*                                   | 6 wks post final injection |
|                  | Multi-dose Group 2  | 10 <sup>6</sup> PFU/ml              | ---            | single                      | 10 <sup>8</sup> PFU/ml              | ---            | Q1-3W               | N/A                             | N/A            | N/A                 | 3-9 wks*                                   | 6 wks post final injection |

| Author, Year | Arm                | Dose 1                 | Time of Dose 1 | Frequency of Dose 1 | Dose 2 | Time of Dose 2 | Frequency of Dose 2 | Dose 3 | Time of Dose 3 | Frequency of Dose 3 | Intervention Window | Follow Up Duration        |
|--------------|--------------------|------------------------|----------------|---------------------|--------|----------------|---------------------|--------|----------------|---------------------|---------------------|---------------------------|
|              | Multi-dose Group 3 | 10 <sup>8</sup> PFU/ml | ---            | Q1-3W               | N/A    | N/A            | N/A                 | N/A    | N/A            | N/A                 | 3-9 wks*            | 6wks post final injection |

DLT: Dose Limiting Toxicity; Pemb: Pembrolizumab; Q2W: every two weeks Q3W: every three weeks; Q1-3W: every 1-3 weeks; Q6W every 6 weeks

--- : not reported

T-VEC was given by intra-tumoral injection in all studies

For peer review only

## Online Supplementary File 7. Preclinical Efficacy Data

| Author, Year   | Experiment | Group                                            | N – Animals Studied   | N – Lesions Studied | Baseline Mean Tumor Measure (Standard Error of Mean) | Final Mean Tumor Measure (Standard Error of Mean) | CR - Injected | CR - Contralateral | Duration of Follow Up |
|----------------|------------|--------------------------------------------------|-----------------------|---------------------|------------------------------------------------------|---------------------------------------------------|---------------|--------------------|-----------------------|
| Cooke, 2015    | 1          | INT: TVEC<br>3x10 <sup>4</sup> PFU               | 10                    | ---                 | ---                                                  | ---                                               | ---           | ---                | ---                   |
|                |            | INT: TVEC<br>3x10 <sup>6</sup> PFU               | 10                    | 10                  | ~150mm <sup>3</sup>                                  | ---                                               | 10/10         | 5/10               | ---                   |
|                |            | ---                                              | 10                    | ---                 | ---                                                  | ---                                               | ---           | ---                | ---                   |
|                |            | ---                                              | 10                    | ---                 | ---                                                  | ---                                               | ---           | ---                | ---                   |
| Piasecki, 2015 | 1          | INT:<br>OncoVexmuGM-<br>CSF                      | ---                   | ---                 | ---                                                  | ---                                               | ---           | ---                | ---                   |
|                |            | INT:<br>OncoVexmuGM-<br>CSF + Anti-PD-<br>1      | ---                   | 20                  | ---                                                  | ---                                               | 8/10          | 2/10               | ---                   |
|                |            | CON: Anti Pd-1                                   | ---                   | ---                 | ---                                                  | ---                                               | ---           | ---                | ---                   |
| Piasecki, 2013 | 1          | INT: T-VEC                                       | ---                   | ---                 | ---                                                  | ---                                               | 70-100%       | 50-60%             | 10 days               |
|                |            | CON: Vehicle                                     | ---                   | ---                 | ---                                                  | ---                                               | ---           | ---                | ---                   |
| Liu, 2003      | 1          | INT:<br>JS1/34.5-/47-<br>/mGM-CSF;<br>injected   | 10                    | N/A                 | 5.2mm (0.34)                                         | 0.004mm (0.31)                                    | N/A           | N/A                | 22 days               |
|                |            | INT:<br>JS1/34.5-/47-<br>/mGM-CSF;<br>injected   | 10                    | N/A                 | 5.7mm (0.29)                                         | 1.1 mm (0.73)                                     | N/A           | N/A                | 22 days               |
|                |            | INT:<br>JS1/34.5-/47-<br>/mGM-CSF;<br>uninjected | (same as<br>injected) | N/A                 | ---                                                  | ---                                               | ---           | ---                | ---                   |
|                |            | INT:<br>JS1/34.5-/47-;<br>injected               | 10                    | N/A                 | 5.4mm (0.37)                                         | 1.4 mm (1.36)                                     | N/A           | N/A                | 22 days               |
|                |            | INT:<br>JS1/34.5-/47-;<br>uninjected             | 10                    | N/A                 | 6.2mm (0.29)                                         | 5.4mm (2.01)                                      | N/A           | N/A                | 22 days               |
|                |            | CON:<br>Vehicle; injected                        | 10                    | N/A                 | 5.4mm (0.40)                                         | 11.9mm (2.69)                                     | N/A           | N/A                | 22 days               |
|                |            | CON:<br>Vehicle;<br>uninjected                   | 10                    | N/A                 | 5.6mm (0.46)                                         | 13.2mm (2.76)                                     | N/A           | N/A                | 22 days               |
|                |            | CON: Vehicle                                     | 10                    | N/A                 | 5.6mm (0.23)                                         | 13.8mm (1.2)                                      | N/A           | N/A                | 21 days               |

--- : not reported

INT: intervention

CON: control

Liu 2003 data from experiment 1 taken from 10<sup>8</sup> dose

Cooke, 2016 did not provide any relevant information

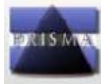

# PRISMA 2009 Checklist

1  
2  
3  
4  
5  
6  
7  
8  
9  
10  
11  
12  
13  
14  
15  
16  
17  
18  
19  
20  
21  
22  
23  
24  
25  
26  
27  
28  
29  
30  
31  
32  
33  
34  
35  
36  
37  
38  
39  
40  
41  
42  
43  
44  
45  
46  
47

| Section/topic                      | #  | Checklist item                                                                                                                                                                                                                                                                                              | Reported on page # |
|------------------------------------|----|-------------------------------------------------------------------------------------------------------------------------------------------------------------------------------------------------------------------------------------------------------------------------------------------------------------|--------------------|
| <b>TITLE</b>                       |    |                                                                                                                                                                                                                                                                                                             |                    |
| Title                              | 1  | Identify the report as a systematic review, meta-analysis, or both.                                                                                                                                                                                                                                         | 1                  |
| <b>ABSTRACT</b>                    |    |                                                                                                                                                                                                                                                                                                             |                    |
| Structured summary                 | 2  | Provide a structured summary including, as applicable: background; objectives; data sources; study eligibility criteria, participants, and interventions; study appraisal and synthesis methods; results; limitations; conclusions and implications of key findings; systematic review registration number. | 2-3                |
| <b>INTRODUCTION</b>                |    |                                                                                                                                                                                                                                                                                                             |                    |
| Rationale                          | 3  | Describe the rationale for the review in the context of what is already known.                                                                                                                                                                                                                              | 3                  |
| Objectives                         | 4  | Provide an explicit statement of questions being addressed with reference to participants, interventions, comparisons, outcomes, and study design (PICOS).                                                                                                                                                  | 3                  |
| <b>METHODS</b>                     |    |                                                                                                                                                                                                                                                                                                             |                    |
| Protocol and registration          | 5  | Indicate if a review protocol exists, if and where it can be accessed (e.g., Web address), and, if available, provide registration information including registration number.                                                                                                                               | 4                  |
| Eligibility criteria               | 6  | Specify study characteristics (e.g., PICOS, length of follow-up) and report characteristics (e.g., years considered, language, publication status) used as criteria for eligibility, giving rationale.                                                                                                      | 4                  |
| Information sources                | 7  | Describe all information sources (e.g., databases with dates of coverage, contact with study authors to identify additional studies) in the search and date last searched.                                                                                                                                  | 5                  |
| Search                             | 8  | Present full electronic search strategy for at least one database, including any limits used, such that it could be repeated.                                                                                                                                                                               | 5                  |
| Study selection                    | 9  | State the process for selecting studies (i.e., screening, eligibility, included in systematic review, and, if applicable, included in the meta-analysis).                                                                                                                                                   | 5                  |
| Data collection process            | 10 | Describe method of data extraction from reports (e.g., piloted forms, independently, in duplicate) and any processes for obtaining and confirming data from investigators.                                                                                                                                  | 5-6                |
| Data items                         | 11 | List and define all variables for which data were sought (e.g., PICOS, funding sources) and any assumptions and simplifications made.                                                                                                                                                                       | 5-6                |
| Risk of bias in individual studies | 12 | Describe methods used for assessing risk of bias of individual studies (including specification of whether this was done at the study or outcome level), and how this information is to be used in any data synthesis.                                                                                      | 6                  |
| Summary measures                   | 13 | State the principal summary measures (e.g., risk ratio, difference in means).                                                                                                                                                                                                                               | 7                  |
| Synthesis of results               | 14 | Describe the methods of handling data and combining results of studies, if done, including measures of consistency (e.g., I <sup>2</sup> ) for each meta-analysis.                                                                                                                                          | 7                  |

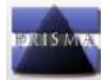

# PRISMA 2009 Checklist

Page 1 of 2

| Section/topic                 | #  | Checklist item                                                                                                                                                                                           | Reported on page # |
|-------------------------------|----|----------------------------------------------------------------------------------------------------------------------------------------------------------------------------------------------------------|--------------------|
| Risk of bias across studies   | 15 | Specify any assessment of risk of bias that may affect the cumulative evidence (e.g., publication bias, selective reporting within studies).                                                             | 6                  |
| Additional analyses           | 16 | Describe methods of additional analyses (e.g., sensitivity or subgroup analyses, meta-regression), if done, indicating which were pre-specified.                                                         | N/A                |
| <b>RESULTS</b>                |    |                                                                                                                                                                                                          |                    |
| Study selection               | 17 | Give numbers of studies screened, assessed for eligibility, and included in the review, with reasons for exclusions at each stage, ideally with a flow diagram.                                          | 7                  |
| Study characteristics         | 18 | For each study, present characteristics for which data were extracted (e.g., study size, PICOS, follow-up period) and provide the citations.                                                             | 7-8                |
| Risk of bias within studies   | 19 | Present data on risk of bias of each study and, if available, any outcome level assessment (see item 12).                                                                                                | 9-10               |
| Results of individual studies | 20 | For all outcomes considered (benefits or harms), present, for each study: (a) simple summary data for each intervention group (b) effect estimates and confidence intervals, ideally with a forest plot. | 8-9                |
| Synthesis of results          | 21 | Present results of each meta-analysis done, including confidence intervals and measures of consistency.                                                                                                  | 8-9                |
| Risk of bias across studies   | 22 | Present results of any assessment of risk of bias across studies (see Item 15).                                                                                                                          | 9-10               |
| Additional analysis           | 23 | Give results of additional analyses, if done (e.g., sensitivity or subgroup analyses, meta-regression [see Item 16]).                                                                                    | N/A                |
| <b>DISCUSSION</b>             |    |                                                                                                                                                                                                          |                    |
| Summary of evidence           | 24 | Summarize the main findings including the strength of evidence for each main outcome; consider their relevance to key groups (e.g., healthcare providers, users, and policy makers).                     | 11-12              |
| Limitations                   | 25 | Discuss limitations at study and outcome level (e.g., risk of bias), and at review-level (e.g., incomplete retrieval of identified research, reporting bias).                                            | 12-13              |
| Conclusions                   | 26 | Provide a general interpretation of the results in the context of other evidence, and implications for future research.                                                                                  | 13                 |
| <b>FUNDING</b>                |    |                                                                                                                                                                                                          |                    |
| Funding                       | 27 | Describe sources of funding for the systematic review and other support (e.g., supply of data); role of funders for the systematic review.                                                               | 14                 |

From: Moher D, Liberati A, Tetzlaff J, Altman DG, The PRISMA Group (2009). Preferred Reporting Items for Systematic Reviews and Meta-Analyses: The PRISMA Statement. PLoS Med 6(7): e1000097. doi:10.1371/journal.pmed1000097

For more information, visit: [www.prisma-statement.org](http://www.prisma-statement.org).

Page 2 of 2

For peer review only - <http://bmjopen.bmj.com/site/about/guidelines.xhtml>
