# Supplementary material for: Mapping the preclinical to clinical evidence and development trajectory of the oncolytic virus talimogene laherparepvec (T-VEC): a systematic review
Source: PubMed Central journal article supplement — BMJ Open. 2019 Dec 2;9(12):e029475. doi: 10.1136/bmjopen-2019-029475 (PMC7003485; doi:10.1136/bmjopen-2019-029475), 2019-12-02
Supplement: bmjopen-2019-029475supp001.pdf [file bmjopen-2019-029475supp001.pdf]

**Online Supplementary File 1: Search Strategy**

Database: Ovid MEDLINE(R) In-Process & Other Non-Indexed Citations and Ovid MEDLINE(R) <1946 to Present>

Search Strategy:

- 
- 1 Talimogen\* laherparepvec.mp. (28)
  - 2 t vec.mp. (24)
  - 3 OncoVEX\*.mp. (15)
  - 4 Imlygic.mp. (2)
  - 5 JS1 34\*.tw. (5)
  - 6 or/1-5 (51)
  - 7 Oncolytic Virotherapy/ or Oncolytic Viruses/ or cancer vaccines/tu (7016)
  - 8 (cancer adj2 (vaccine\* or virus\* or virotherap\* or viral therap\*).tw. (5206)
  - 9 exp neoplasms/ or cancer.tw. (3097511)
  - 10 or/7-9 (3097684)
  - 11 simplexvirus/ or herpesvirus 1, human/ or Herpes Simplex/ (32955)
  - 12 (hsv1 or hsv or herpesvirus or Herpes).tw. (72684)
  - 13 11 or 12 (77360)
  - 14 10 and 13 (12929)
  - 15 ((oncolyt\* or cancer or tumor or tumour) adj3 (hsv1 or hsv or hsv or herpesvirus or Herpes)).tw. (846)
  - 16 (oncolyt\* adj3 (virotherap\* or virus\* or viral therap\*).tw. (2183)
  - 17 or/14-16 (14671)
  - 18 exp animal experimentation/ or exp models, animal/ or animals/ or mammals/ or vertebrates/ or exp fishes/ or exp amphibia/ or exp reptiles/ or exp birds/ or exp hyraxes/ or exp marsupialia/ or exp monotremata/ or exp scandentia/ or exp chiroptera/ or exp carnivora/ or exp cetacea/ or exp Xenarthra/ or exp elephants/ or exp insectivora/ or exp lagomorpha/ or exp rodentia/ or exp sirenia/ or exp Perissodactyla/ or primates/ or exp strepsirhini/ or haplorhini/ or exp tarsii/ or exp platyrrhini/ or catarrhini/ or exp cercopithecidae/ or gorilla gorilla/ or pan paniscus/ or pan troglodytes/ or exp pongo/ or exp hylobatidae/ or hominidae/ (5893175)
  - 19 (animal\$1 or chordata or vertebrate\* or fish\$2 or amphibian\* or amphibium\* or reptile\$1 or bird\$1 or mammal\* or dog or dogs or canine\$1 or cat or cats or hyrax\* or marsupial\* or monotrem\* or scandentia or bat or bats or carnivor\* or cetacea or edentata\* or elephant\* or insect or insects or insectivore or lagomorph\* or rodent\$2 or mouse or mice or murine or murinae or muridae or rat or rats or pig or pigs or piglet\$1 or swine or rabbit\$1 or sheep\$1 or goat\$1 or horse\$1 or equus or cow or cows or cattle or calf or calves or bovine or sirenia or ungulate\$1 or primate\$1 or prosimian\* or haplorhini\* or tarsiiiform\* or simian\* or platyrrhini or catarrhini or cercopithecidae or ape or apes or hylobatidae or hominid\* or chimpanzee\* or gorilla\* or orangutan\* or monkey or monkeys or ape or apes).tw. (4149175)
  - 20 (preclinic\$ or pre clinic\$).tw. (72274)
  - 21 or/18-20 (6474971)
  - 22 17 and 21 (6511)
  - 23 6 or 22 (6545)

## Online Supplementary File 2. Preclinical Study Characteristics

| Author, Year   | Year Study Conducted | Country | Study Design                   | Species | Strain  | Model                             | Type of Cancer | Baseline Tumor Size | Gender | Mean Age | Mean Weight | Co-Interventions            | Duration of Follow Up |
|----------------|----------------------|---------|--------------------------------|---------|---------|-----------------------------------|----------------|---------------------|--------|----------|-------------|-----------------------------|-----------------------|
| Cooke, 2015    | ---                  | USA     | Interventional; Non-Controlled | Mouse   | Balb/c  | A20 Murine Lymphoma               | Lymphoma       | 150 mm <sup>3</sup> | Female | ---      | ---         | N/A                         | ---                   |
| Piasecki, 2015 | ---                  | ---     | Controlled Comparison          | Mouse   | C57Bl/6 | Syngeneic MC-38 Colon Carcinoma   | Colon Cancer   | ---                 | ---    | ---      | ---         | Anti-PD-1                   | ---                   |
| Piasecki, 2013 | ---                  | ---     | Controlled Comparison          | Mouse   | ---     | A20 Syngeneic Contralateral Model | Lymphoma       | ---                 | ---    | ---      | ---         | N/A                         | 10 days               |
| Liu, 2003      | 2002                 | UK      | Controlled Comparison          | Mouse   | Balb/c  | Syngeneic A20 Lymphoma            | Lymphoma       | 0.5 cm diameter     | ---    | ---      | ---         | Immunization wild type HSV1 | 35 days               |

---: not reported

N/A: not applicable

Cooke, 2016 did not provide any relevant information

## Online Supplementary File 3. Preclinical Intervention and Comparator Characteristics

| Author, Year   | Experiment | Group                           | N   | Dose 1                        | Frequency Dose 1 | Duration Dose 1               | Dose 2          | Frequency Dose 2 | Duration Dose 2 | Dose 3 | Frequency Dose 3 | Duration Dose 3 |     |
|----------------|------------|---------------------------------|-----|-------------------------------|------------------|-------------------------------|-----------------|------------------|-----------------|--------|------------------|-----------------|-----|
| Cooke, 2015    | 1          | Cohort 1: TVEC                  | 10  | 3x10 <sup>4</sup> PFU         | ---              | ---                           | N/A             | N/A              | N/A             | N/A    | N/A              | N/A             |     |
|                |            | Cohort 2:                       | 10  | ---                           | ---              | ---                           | N/A             | N/A              | N/A             | N/A    | N/A              | N/A             |     |
|                |            | Cohort 3: TVEC                  | 10  | 3x10 <sup>6</sup> PFU         | Every 3 days     | 1 week                        | N/A             | N/A              | N/A             | N/A    | N/A              | N/A             | N/A |
|                |            | Cohort 4:                       | 10  | ---                           | ---              | ---                           | N/A             | N/A              | N/A             | N/A    | N/A              | N/A             | N/A |
| Piasecki, 2015 | 1          | Int: OncoVEXmuGM-CSF + Anti-PD1 | --- | T-VEC: ---                    | Every 3 days     | 3 doses                       | Anti-PD-1: ---  | Twice per wk     | ---             | N/A    | N/A              | N/A             |     |
|                |            | Int: OncoVEXmuGM-CSF            | --- | T-VEC: ---                    | ---              | ---                           | ---             | ---              | ---             | ---    | ---              | ---             |     |
|                |            | Con: Anti-PD-1                  | --- | Anti-PD-1: ---                | ---              | ---                           | ---             | ---              | ---             | ---    | ---              | ---             |     |
| Piasecki, 2013 | 1          | Int: T-VEC                      | --- | 5x10 <sup>6</sup> PFU         | single           | single                        | N/A             | N/A              | N/A             | N/A    | N/A              | N/A             |     |
|                |            | Con: Vehicle                    | --- | ---                           | single           | single                        | N/A             | N/A              | N/A             | N/A    | N/A              | N/A             | N/A |
| Liu, 2003      | 1          | Int: JS1/34.5-/47-/mGM-CSF      | 10  | 10 <sup>6</sup> PFU/ml (50µl) | Every other day  | 3 doses – 5 days              | N/A             | N/A              | N/A             | N/A    | N/A              | N/A             |     |
|                |            |                                 | 10  | 10 <sup>7</sup> PFU/ml (50µl) | Every other day  | 3 doses – 5 days              | N/A             | N/A              | N/A             | N/A    | N/A              | N/A             |     |
|                |            |                                 | 10  | 10 <sup>8</sup> PFU/ml (50µl) | Every other day  | 3 doses – 5 days              | N/A             | N/A              | N/A             | N/A    | N/A              | N/A             |     |
|                |            | Int: JS1/34.5-/47-              | 10  | 10 <sup>6</sup> PFU/ml (50µl) | Every other day  | 3 doses – 5 days              | N/A             | N/A              | N/A             | N/A    | N/A              | N/A             | N/A |
|                |            |                                 | 10  | 10 <sup>7</sup> PFU/ml (50µl) | Every other day  | 3 doses – 5 days              | N/A             | N/A              | N/A             | N/A    | N/A              | N/A             | N/A |
|                |            |                                 | 10  | 10 <sup>8</sup> PFU/ml (50µl) | Every other day  | 3 doses – 5 days              | N/A             | N/A              | N/A             | N/A    | N/A              | N/A             | N/A |
|                |            | Con: vehicle                    | 10  | 50µl                          | Every other day  | 3 doses – 5 days              | N/A             | N/A              | N/A             | N/A    | N/A              | N/A             | N/A |
|                |            |                                 | 2   | Int: JS1/34.5-/47-/mGM-CSF    | 10               | 10 <sup>8</sup> PFU/ml (50µl) | Every other day | 3 doses – 5 days | N/A             | N/A    | N/A              | N/A             | N/A |
|                |            | Con: Vehicle                    | 10  | 50µl                          | Every other day  | 3 doses – 5 days              | N/A             | N/A              | N/A             | N/A    | N/A              | N/A             |     |

All doses of T-VEC were given by injection intratumorally

---: not reported

Int: intervention; Con: control; wk: week; PFU: plaque forming units

Cooke, 2016 did not provide any relevant information

## Online Supplementary File 4. Clinical Study Characteristics

| Author, Year     | Country                            | Year Study Conducted | Study Type                                       | Type of Cancer                               | Primary Outcomes                                                                                   | Secondary Outcomes                                                                                           |
|------------------|------------------------------------|----------------------|--------------------------------------------------|----------------------------------------------|----------------------------------------------------------------------------------------------------|--------------------------------------------------------------------------------------------------------------|
| Andtbacka, 2015  | USA, UK, Canada and South Africa   | 2009-2014            | Interventional; Randomized (OPTiM Trial)         | Melanoma                                     | Efficacy: DRR                                                                                      | Efficacy: ORR<br>OS<br>Best Overall Response<br>Onset and duration of response<br>Time to treatment failure  |
| Long 2015        | USA, Australia, Switzerland, Spain | 2014-2022            | Interventional: Non-randomized, No control       | Melanoma                                     | Safety: Dose Limiting Toxicities                                                                   | Efficacy: DRR<br>OS<br>Progression Free Survival<br>Safety: AEs                                              |
| Puzanov, 2015    | USA                                | 2013-2014            | Interventional: Non-Randomized                   | Melanoma                                     | Safety: Dose Limiting Toxicities                                                                   | Efficacy: ORR<br>Safety: Grade $\geq 3$ AEs                                                                  |
| Chang, 2012      | USA                                | 2006-2008            | Interventional: Non-randomized, No control       | Pancreatic Cancer                            | Efficacy: Detection of T-VEC in blood and urine<br>Presence of Anti-HSV1 Antibodies<br>Safety: AEs | Efficacy: ORR<br>Change in sum of longest tumor diameter<br>Change in pain intensity                         |
| Harrington, 2010 | UK                                 | 2005-2010            | Interventional: Non-randomized, No control       | Squamous Cell Carcinoma of the head and neck | Safety: AEs                                                                                        | Efficacy: Antitumor Activity<br>OS*<br>Complete Response*<br>Partial Response*<br>Progression Free Survival* |
| Senzer 2009      | USA                                | 2005-2008            | Interventional; (non-controlled, non randomized) | Melanoma                                     | Efficacy: ORR                                                                                      | Efficacy: OS<br>Safety: AEs                                                                                  |
| Hu, 2006         | USA, UK                            | ---                  | Interventional: Non-randomized, No control       | Breast, Colorectal, Melanoma, Head and Neck  | Efficacy: Biodistribution<br>Safety: AEs                                                           | Efficacy: GM-CSF expression<br>HSV antigen associated necrosis<br>Viral Replication<br>Local Reactions       |

---: Not Reported

\*: not reported a priori

AEs - adverse events; CHN- cutaneous head and neck; DRR – durable response rate; ECOG – Eastern Cooperative Oncology Group; ORR- objective response rate; OS – overall survival

**Online Supplementary File 5. Clinical Patient Characteristics**

| Author, Year     | Group                        | Patients (N) | Median Age (range) | Sex (n; F) | Metastasis Stage (n; Stage IVM1b/c) | Line of Therapy (n; first line) | HSV Serostatus (n; Seropositive, n; unknown) |
|------------------|------------------------------|--------------|--------------------|------------|-------------------------------------|---------------------------------|----------------------------------------------|
| Andtbacka, 2015  | T-VEC                        | 295          | 63 (22-94)         | 122        | 131                                 | 138                             | 175, 23                                      |
| Long, 2015       | T-VEC + Pembrolizumab        | 21           | 58                 | 13         | 11                                  | ---                             | ---                                          |
| Puzanov, 2015    | T-VEC + Ipilimumab           | 18           | ---                | ---        | ---                                 | 18                              | ---                                          |
| Chang, 2012      | T-VEC                        | 17           | 54                 | 6          | ---                                 | ---                             | ---                                          |
| Harrington, 2010 | T-VEC and Chemo radiotherapy | 17           | 58 (41-74)         | 2          | 3                                   | ---                             | ---                                          |
| Senzer, 2009     | T-VEC                        | 50           | 62 (34-88)         | 28         | 24                                  | 0                               | 36, 1                                        |
| Hu, 2006         | T-VEC                        | 30           | 55 (30-80)         | 23         | ---                                 | 0                               | 19                                           |

--- : Not Reported

## Online Supplementary File 6. Clinical Intervention and Comparator Characteristics

| Author, Year     | Arm                 | Dose 1                              | Time of Dose 1 | Frequency of Dose 1         | Dose 2                              | Time of Dose 2 | Frequency of Dose 2 | Dose 3                          | Time of Dose 3 | Frequency of Dose 3 | Intervention Window                        | Follow Up Duration         |
|------------------|---------------------|-------------------------------------|----------------|-----------------------------|-------------------------------------|----------------|---------------------|---------------------------------|----------------|---------------------|--------------------------------------------|----------------------------|
| Andtbacka, 2015  | T-VEC               | 10 <sup>6</sup> PFU/ml (≤4ml)       | Week 1         | single                      | 10 <sup>8</sup> PFU/ml (≤4ml)       | Week 4         | Q2W                 | N/A                             | N/A            | N/A                 | Median: 23 wks (0.1-79 wks)                | Median: 44 mo (32-58 mo)   |
|                  | GM-CSF              | 125 µg/m <sup>2</sup>               | Week 1         | Once daily 14/28 day cycles | N/A                                 | N/A            | N/A                 | N/A                             | N/A            | N/A                 | Median: 10 wks (0.6 to 72 wks)             | ---                        |
| Long, 2015       | T-VEC + Pemb.       | TVEC: 10 <sup>6</sup> PFU/ml        | Day 1          | single                      | T-VEC: 10 <sup>8</sup> PFU/ml       | Day 22         | Q2W                 | Pemb: 200 mg                    | Day 36         | Q2W                 | Median TVEC: 13 wks<br>Median Pemb: 10 wks | ---                        |
| Puzanov, 2015    | T-VEC + Ipilimumab  | TVEC: 10 <sup>6</sup> PFU/ml (≤4ml) | Week 1         | single                      | TVEC: 10 <sup>8</sup> PFU/ml (≤4ml) | Week 4         | Q2W                 | Ipilimumab: 3mg/kg              | Week 6         | Q3W                 | TVEC: until DLT<br>Ipi: 12 wks             | 17 mo minimum              |
| Chang, 2012      | Cohort 1            | 10 <sup>4</sup> PFU/ml              | Week 1*        | single                      | 10 <sup>5</sup> PFU/ml              | Week 4*        | Q3W*                | N/A                             | N/A            | N/A                 | up to 15 wks                               | ---                        |
|                  | Cohort 2            | 10 <sup>5</sup> PFU/ml              | Week 1         | single                      | 10 <sup>6</sup> PFU/ml              | Week 4         | Q3W                 | N/A                             | N/A            | N/A                 | up to 15 wks                               | ---                        |
|                  | Cohort 3            | 10 <sup>6</sup> PFU/ml              | Week 1         | single                      | 10 <sup>7</sup> PFU/ml              | Week 4         | Q3W                 | N/A                             | N/A            | N/A                 | up to 15 wks                               | ---                        |
| Harrington, 2010 | Cohort 1            | T-VEC: 10 <sup>6</sup> PFU/ml       | Day 1          | Q3W                         | Cisplatin: 100mg/m <sup>2</sup>     | Day 1          | Q3W                 | N/A                             | N/A            | N/A                 | Up to 9 weeks                              | Median: 29mo (19-40mo)     |
|                  | Cohort 2            | T-VEC: 10 <sup>6</sup> PFU/ml       | Day 1          | single                      | T-VEC: 10 <sup>7</sup> PFU/ml       | Day 22         | Q3W                 | Cisplatin: 100mg/m <sup>2</sup> | Day 1          | Q3W                 | Up to 9 weeks                              | Median: 29mo (19-40mo)     |
|                  | Cohort 3            | T-VEC: 10 <sup>6</sup> PFU/ml       | Day 1          | single                      | T-VEC: 10 <sup>8</sup> PFU/ml       | Day 22         | Q3W                 | Cisplatin: 100mg/m <sup>2</sup> | Day 1          | Q3W                 | Up to 9 weeks                              | Median: 29mo (19-40mo)     |
|                  | Cohort 4            | T-VEC: 10 <sup>6</sup> PFU/ml       | Day 1          | single                      | T-VEC: 10 <sup>8</sup> PFU/ml       | Day 22         | Q3W                 | Cisplatin: 100mg/m <sup>2</sup> | Day 1          | Q3W                 | Up to 9 weeks                              | Median: 29mo (19-40mo)     |
| Senzer, 2009     | T-VEC               | 10 <sup>6</sup> PFU/ml (≤4ml)       | Week 1         | Single                      | 10 <sup>8</sup> PFU/ml (≤4ml)       | Week 4         | Q2W                 | N/A                             | N/A            | N/A                 | Max: 48 wks<br>Median: 11 wks              | Median: 18 mo (11-36 mo)   |
| Hu, 2006         | Single Dose Group 1 | 10 <sup>6</sup> PFU/ml              | ---            | single                      | N/A                                 | N/A            | N/A                 | N/A                             | N/A            | N/A                 | Single dose                                | 6 wks                      |
|                  | Single Dose Group 2 | 10 <sup>7</sup> PFU/ml              | ---            | single                      | N/A                                 | N/A            | N/A                 | N/A                             | N/A            | N/A                 | Single dose                                | 6 wks                      |
|                  | Single Dose Group 3 | 10 <sup>8</sup> PFU/ml              | ---            | single                      | N/A                                 | N/A            | N/A                 | N/A                             | N/A            | N/A                 | Single dose                                | 6 wks                      |
|                  | Multi-dose Group 1  | 10 <sup>6</sup> PFU/ml              | ---            | single                      | 10 <sup>7</sup> PFU/ml              | ---            | Q1-3W               | N/A                             | N/A            | N/A                 | 3-9 wks*                                   | 6 wks post final injection |
|                  | Multi-dose Group 2  | 10 <sup>6</sup> PFU/ml              | ---            | single                      | 10 <sup>8</sup> PFU/ml              | ---            | Q1-3W               | N/A                             | N/A            | N/A                 | 3-9 wks*                                   | 6 wks post final injection |

| Author, Year | Arm                | Dose 1                 | Time of Dose 1 | Frequency of Dose 1 | Dose 2 | Time of Dose 2 | Frequency of Dose 2 | Dose 3 | Time of Dose 3 | Frequency of Dose 3 | Intervention Window | Follow Up Duration        |
|--------------|--------------------|------------------------|----------------|---------------------|--------|----------------|---------------------|--------|----------------|---------------------|---------------------|---------------------------|
|              | Multi-dose Group 3 | 10 <sup>8</sup> PFU/ml | ---            | Q1-3W               | N/A    | N/A            | N/A                 | N/A    | N/A            | N/A                 | 3-9 wks*            | 6wks post final injection |

DLT: Dose Limiting Toxicity; Pemb: Pembrolizumab; Q2W: every two weeks Q3W: every three weeks; Q1-3W: every 1-3 weeks; Q6W every 6 weeks

--- : not reported

T-VEC was given by intra-tumoral injection in all studies

## Online Supplementary File 7. Preclinical Efficacy Data

| Author, Year   | Experiment | Group                                  | N – Animals Studied        | N – Lesions Studied | Baseline Mean Tumor Measure (Standard Error of Mean) | Final Mean Tumor Measure (Standard Error of Mean) | CR - Injected | CR - Contralateral | Duration of Follow Up |         |
|----------------|------------|----------------------------------------|----------------------------|---------------------|------------------------------------------------------|---------------------------------------------------|---------------|--------------------|-----------------------|---------|
| Cooke, 2015    | 1          | INT: TVEC 3x10 <sup>4</sup> PFU        | 10                         | ---                 | ---                                                  | ---                                               | ---           | ---                | ---                   |         |
|                |            | INT: TVEC 3x10 <sup>6</sup> PFU        | 10                         | 10                  | ~150mm <sup>3</sup>                                  | ---                                               | 10/10         | 5/10               | ---                   |         |
|                |            | ---                                    | 10                         | ---                 | ---                                                  | ---                                               | ---           | ---                | ---                   |         |
| Piasecki, 2015 | 1          | INT: OncoVexmuGM-CSF                   | ---                        | ---                 | ---                                                  | ---                                               | ---           | ---                | ---                   |         |
|                |            | INT: OncoVexmuGM-CSF + Anti-PD-1       | ---                        | 20                  | ---                                                  | ---                                               | 8/10          | 2/10               | ---                   |         |
|                |            | CON: Anti Pd-1                         | ---                        | ---                 | ---                                                  | ---                                               | ---           | ---                | ---                   |         |
| Piasecki, 2013 | 1          | INT: T-VEC                             | ---                        | ---                 | ---                                                  | ---                                               | 70-100%       | 50-60%             | 10 days               |         |
|                |            | CON: Vehicle                           | ---                        | ---                 | ---                                                  | ---                                               | ---           | ---                | ---                   |         |
| Liu, 2003      | 1          | INT: JS1/34.5-/47-/mGM-CSF; injected   | 10                         | N/A                 | 5.2mm (0.34)                                         | 0.004mm (0.31)                                    | N/A           | N/A                | 22 days               |         |
|                |            | INT: JS1/34.5-/47-/mGM-CSF; uninjected | 10 (same as injected)      | N/A                 | 5.7mm (0.29)                                         | 1.1 mm (0.73)                                     | N/A           | N/A                | 22 days               |         |
|                |            | INT: JS1/34.5-/47-; injected           | 10                         | N/A                 | 5.4mm (0.37)                                         | 1.4 mm (1.36)                                     | N/A           | N/A                | 22 days               |         |
|                |            | INT: JS1/34.5-/47-; uninjected         | 10 (same as injected)      | N/A                 | 6.2mm (0.29)                                         | 5.4mm (2.01)                                      | N/A           | N/A                | 22 days               |         |
|                |            | CON: Vehicle; injected                 | 10                         | N/A                 | 5.4mm (0.40)                                         | 11.9mm (2.69)                                     | N/A           | N/A                | 22 days               |         |
|                |            | CON: Vehicle; uninjected               | 10 (same as injected)      | N/A                 | 5.6mm (0.46)                                         | 13.2mm (2.76)                                     | N/A           | N/A                | 22 days               |         |
|                |            | 2                                      | INT: JS1/34.5-/47-/mGM-CSF | 10                  | N/A                                                  | 5.5mm (0.34)                                      | 2.2mm (1.6)   | N/A                | N/A                   | 21 days |
|                |            |                                        | CON: Vehicle               | 10                  | N/A                                                  | 5.6mm (0.23)                                      | 13.8mm (1.2)  | N/A                | N/A                   | 21 days |

--- : not reported

INT: intervention

CON: control

Liu 2003 data from experiment 1 taken from 10<sup>8</sup> dose

Cooke, 2016 did not provide any relevant information
